# Supplementary material for: Trends in socioeconomic inequalities in five major risk factors for cardiovascular disease in the Korean population: a cross-sectional study using data from the Korea National Health and Nutrition Examination Survey, 2001–2014
Source: PubMed Central journal article supplement — BMJ Open. 2017 May 17;7(5):e014070. doi: 10.1136/bmjopen-2016-014070 (PMC5623416; doi:10.1136/bmjopen-2016-014070), 2017-05-17
Supplement: bmjopen-2016-014070.draft_revisions.pdf [file bmjopen-2016-014070.draft_revisions.pdf]

# BMJ Open

## Gender differences in trends in socioeconomic inequalities in five major risk factors for cardiovascular disease in the Korean population: results from the Korea National Health and Nutrition Examination Survey, 2001-2014

|                                 |                                                                                                                                                                                                                                                                                                                                                                                                                                                                                                                                                                                                                                                                                                                                                                                                                                                                                                                     |
|---------------------------------|---------------------------------------------------------------------------------------------------------------------------------------------------------------------------------------------------------------------------------------------------------------------------------------------------------------------------------------------------------------------------------------------------------------------------------------------------------------------------------------------------------------------------------------------------------------------------------------------------------------------------------------------------------------------------------------------------------------------------------------------------------------------------------------------------------------------------------------------------------------------------------------------------------------------|
| Journal:                        | <i>BMJ Open</i>                                                                                                                                                                                                                                                                                                                                                                                                                                                                                                                                                                                                                                                                                                                                                                                                                                                                                                     |
| Manuscript ID                   | bmjopen-2016-014070                                                                                                                                                                                                                                                                                                                                                                                                                                                                                                                                                                                                                                                                                                                                                                                                                                                                                                 |
| Article Type:                   | Research                                                                                                                                                                                                                                                                                                                                                                                                                                                                                                                                                                                                                                                                                                                                                                                                                                                                                                            |
| Date Submitted by the Author:   | 29-Aug-2016                                                                                                                                                                                                                                                                                                                                                                                                                                                                                                                                                                                                                                                                                                                                                                                                                                                                                                         |
| Complete List of Authors:       | Kim, Yoon Jung; Hallym University Kangdong Sacred Heart Hospital, Department of Internal Medicine<br>Lee, Ji Sung; Asan Medical Center, University of Ulsan College of Medicine, Clinical Research Center<br>Park, Juri; Hallym University Kangdong Sacred Heart Hospital, Division of Endocrinology and Metabolism, Department of Internal Medicine<br>Choi, Dong Seop; Korea University College of Medicine, Department of Internal Medicine<br>Kim, Doo Man; Hallym University Kangdong Sacred Heart Hospital, Division of Endocrinology and Metabolism, Department of Internal Medicine<br>Lee, Kee-Hyoung ; Korea University College of Medicine, Pediatrics<br>Kim, Ho Yeon ; Inha University Hospital, Department of Obstetrics and Gynecology<br>Kim, Sin Gon; Korea University College of Medicine, Department of Internal Medicine<br>Lee, Juneyoung; Korea University College of Medicine, Biostatistics |
| <b>Primary Subject Heading</b>: | Epidemiology                                                                                                                                                                                                                                                                                                                                                                                                                                                                                                                                                                                                                                                                                                                                                                                                                                                                                                        |
| Secondary Subject Heading:      | Cardiovascular medicine, Health policy, Public health                                                                                                                                                                                                                                                                                                                                                                                                                                                                                                                                                                                                                                                                                                                                                                                                                                                               |
| Keywords:                       | Health inequality, cardiovascular disease, trend                                                                                                                                                                                                                                                                                                                                                                                                                                                                                                                                                                                                                                                                                                                                                                                                                                                                    |
|                                 |                                                                                                                                                                                                                                                                                                                                                                                                                                                                                                                                                                                                                                                                                                                                                                                                                                                                                                                     |

SCHOLARONE™  
Manuscripts

1  
2  
3  
4 **Gender differences in trends in socioeconomic inequalities in five major**  
5 **risk factors for cardiovascular disease in the Korean population: results**  
6 **from the Korea National Health and Nutrition Examination Survey, 2001-**  
7 **2014**  
8  
9  
10  
11  
12  
13

14  
15  
16  
17  
18 Yoon Jung Kim<sup>1\*</sup>, Ji Sung Lee<sup>2\*</sup>, Juri Park<sup>1</sup>, Dong Seop Choi<sup>3</sup>, Doo Man Kim<sup>1</sup>, Kee-Hyoung  
19 Lee<sup>4</sup>, Ho Yeon Kim<sup>5</sup>, Sin Gon Kim<sup>3†</sup>, Juneyoung Lee<sup>6†</sup>  
20  
21  
22

23  
24  
25 YJK\* and JSL\* contributed equally to this study.  
26

27  
28 SGK<sup>†</sup> and JL<sup>†</sup> contributed equally to this study.  
29  
30  
31

32  
33 <sup>1</sup>Division of Endocrinology and Metabolism, Department of Internal Medicine, Hallym  
34 University Kangdong Sacred Heart Hospital, Seoul, Korea  
35  
36

37  
38 <sup>2</sup>Clinical Research Center, Asan Medical Center, University of Ulsan College of Medicine,  
39 Seoul, Korea  
40  
41

42  
43 <sup>3</sup>Division of Endocrinology and Metabolism, Department of Internal Medicine, Korea  
44 University College of Medicine, Seoul, Korea  
45  
46

47  
48 <sup>4</sup>Department of Pediatrics, Korea University College of Medicine, Seoul, Korea  
49

50  
51 <sup>5</sup>Department of Obstetrics and Gynecology, Inha University Hospital, Incheon, Korea  
52

53  
54 <sup>6</sup>Department of Biostatistics, Korea University College of Medicine, Seoul, Korea  
55  
56

1  
2  
3  
4  
5  
6  
7 **Correspondence to:** 1) Juneyoung Lee, PhD

8  
9  
10 Department of Biostatistics, Korea University College of Medicine, Anam-dong 5-ga,  
11  
12 Seongbuk-gu, Seoul 136-701, Korea

13  
14  
15 Tel: 82-2-920-6436; Fax: 82-2-953-6439; E-mail: [jyleeuf@korea.ac.kr](mailto:jyleeuf@korea.ac.kr)  
16  
17

18  
19  
20  
21 2) Sin Gon Kim, MD, PhD

22  
23 Division of Endocrinology and Metabolism, Department of Internal Medicine, Korea  
24  
25 University, College of Medicine, 126-1, Anam-dong 5-ga, Seongbuk-gu, Seoul 136-705,  
26  
27  
28 Korea

29  
30  
31 Tel: 82-2-920-5890, Fax: 82-2-953-9355, E-mail: [k50367@korea.ac.kr](mailto:k50367@korea.ac.kr)  
32  
33

34  
35  
36 Word count:2984  
37  
38  
39  
40  
41  
42  
43  
44  
45  
46  
47  
48  
49  
50  
51  
52  
53  
54  
55  
56  
57  
58  
59  
60

## ABSTRACT

**Objectives:** To examine the trends in socioeconomic inequalities in major CVD risk factors (smoking, obesity, diabetes, hypertension, hypercholesterolemia)

**Design:** Cross-sectional study

**Setting:** A nationally representative population survey data

**Participants:** A total of 42,725 Koreans, aged 25-64 years, using data from the Korean National Health and Nutrition Examination Survey II (2001) to VI (2013-2014).

**Main outcome measures:** Trends in socioeconomic inequalities in five major CVD risk factors (smoking, obesity, diabetes, hypertension, hypercholesterolemia)

**Results** Gender differences were noted in the time trends in socioeconomic inequalities in smoking, obesity, diabetes and hypertension. Among men, low SES was associated with higher prevalence of smoking, but not with obesity, diabetes or hypertension. Indeed, magnitudes of socioeconomic inequalities in smoking, obesity and diabetes remained unchanged, and the magnitude of the inequality in hypertension decreased over time. However, among women low SES was associated with high prevalences of smoking, obesity, diabetes and hypertension. Time trends towards increasing socioeconomic inequalities, measured by income, in smoking, obesity and diabetes were found in women. Unlike the other CVD risk factors, hypercholesterolemia was not associated with socioeconomic inequalities.

**Conclusions** SES had a stronger impact on major CVD risk factors among Korean women than men. Moreover, socioeconomic inequalities in smoking, obesity and diabetes worsened

1  
2  
3  
4 among Korean women over time. Public policies to prevent smoking, obesity and diabetes in  
5  
6 women in lower SES groups are needed to address inequalities.  
7

8  
9 Keywords: Trend, health inequality, cardiovascular disease  
10

### 11 12 13 14 **Strengths and limitations of the study** 15

- 16  
17  
18 - This study shows that SES has stronger impact on major CVD risk factors (smoking,  
19  
20 obesity, hypertension, diabetes mellitus) among Korean women than men.  
21
- 22  
23 - Among Korean women, socioeconomic inequalities in smoking, obesity and diabetes  
24  
25 has been worsened over past fourteen years.  
26  
27
- 28 - It is difficult to determine causal relationships between SES and CVD risk factors  
29  
30 because of the cross-sectional design of the study.  
31  
32  
33  
34  
35  
36  
37  
38  
39  
40  
41  
42  
43  
44  
45  
46  
47  
48  
49  
50  
51  
52  
53  
54  
55  
56  
57  
58  
59  
60

## INTRODUCTION

Socioeconomic status (SES) has shown inverse associations with cardiovascular disease (CVD) in most industrialised Western countries, such that disadvantaged groups experience higher risks for CVD.[1-2] A considerable portion of the association between SES and CVD has been attributed to the combined effects of inequalities in health-related behaviours, environmental conditions, social structures and contact with and delivery of healthcare services.[3] As CVD mortality and morbidity contribute sizeable proportions to overall health inequality, attempts to reduce these causes of death are public health concerns.[4] Previous studies have shown that a greater decline in the prevalence of CVD risk factors among higher SES groups widened the gap between different SES groups over time in the US over time.[5-6] However, studies in England and Australia failed to provide strong evidence of that socioeconomic inequalities in CVD risk factors had increased in recent decades.[7-8]

Korea, a recently developed country, has experienced rapid socioeconomic growth during the last 50 years. There has been a 10-fold increase in the per capita gross national income over the past 30 years (to \$27,000 US in 2015), but, at the same time, there has also been a widening gap in socioeconomic circumstances.[9-10] Thus, it remains unclear whether the increased overall wealth has resulted in improved health status across all segments of the population.

To our knowledge, no previous study has examined time trends in socioeconomic inequalities with regard to major CVD risk factors in Koreans. The purpose of this study was to examine recent national trends in socioeconomic inequalities in five major CVD risk factors (smoking, obesity, diabetes, hypertension, hypercholesterolemia) by gender using a nationwide survey data.

## METHODS

### Study participants

This study was based on data from five consecutive Korean National Health and Nutrition Examination Surveys (KNHANES) conducted from 2001 to 2014. A detailed description of the survey design and data collection in the KNHANES has been published before.[11] The KNHANES was initiated in 1998 and has been conducted as a series of surveys. We excluded the data from KNHANES I (1998) due to a lack of reliability.[12-13] Representative households of non-institutionalised Koreans residing in Korea were selected using a stratified and multi-stage clustered probability sampling method. The response rates in the target population ranged from 70.2% to 86.5%. In this study, the study population was limited to adults aged 25-64 years old to examine trends in socioeconomic inequalities. Considering the applicability of socioeconomic measures (such as education level and household income), we excluded survey participants aged younger than 25 who may not have completed their education or have no job and those older than 64 because they were mostly economically inactive. The total number of participants in the analysis was 42,725; 6,673 for the KNHANES II (2001), 6,134 for the KNHANES III (2005), 12,366 for the KNHANES IV (2007-2009), 12,911 for the KNHANES V (2010-2012), and 7,812 for the KNHANES VI (2013-2014).

### Health interview and health examination survey

The KNHANES consists of three components: a health interview, a health examination, and a

1  
2  
3  
4 nutrition survey. The health interview survey collects detailed information on SES (e.g.  
5 education level, household income), smoking and drinking behaviours, and healthcare  
6 utilisation. Prior diagnosis of diabetes and hypertension by a physician and current use of  
7 anti-hypertensive and anti-hyperglycaemic agents are included in the questionnaire. Height to  
8 the nearest 0.1 cm was measured using portable stadiometers. Weight to the nearest 0.1 kg  
9 was measured using a portable electronic scale. According to the standard protocol, systolic  
10 blood pressure (SBP) and diastolic blood pressure (DBP) were measured by trained nurses  
11 using a mercury sphygmomanometer (Baumanometer Desk model; Baum, NY, USA) on the  
12 right arm of the subject while sitting after at least 5 min of rest.  
13  
14  
15  
16  
17  
18  
19  
20  
21  
22  
23

### 24 25 26 27 **Blood sample collection and biochemical analysis**

28  
29  
30 Venous blood samples were obtained from each participant in the morning after fasting for at  
31 least 8 h. All samples were processed according to the protocols of KNHANES. After blood  
32 collection, an 8-mL serum separating tube for analysing blood lipid level was kept at room  
33 temperature for 30 min, and the blood was subsequently centrifuged (3000 rpm, 15 min). A  
34 2-ml sodium fluoride tube for analysing glucose levels was mixed in a roller mixer for 10 min.  
35 All blood samples were refrigerated at 2-8°C and then transported to the central laboratory.  
36 Within 24 h of blood collection, plasma concentrations of glucose and lipid were assayed  
37 using an Advia 1650 (Siemens, NY, USA) in 2005 and 2007 and using a Hitachi Automatic  
38 Analyzer 7600 (Hitachi, Tokyo, Japan) since 2008. Since 2005, all laboratory analyses were  
39 performed according to the protocol and monitored to ensure the values met acceptable  
40 standards of precision and reproducibility in a central laboratory. Because quality control for  
41 the biochemical analysis of blood was started by the KCDC in 2005, we analysed the data on  
42  
43  
44  
45  
46  
47  
48  
49  
50  
51  
52  
53  
54  
55  
56  
57  
58  
59  
60



1  
2  
3  
4 serum glucose and total cholesterol that were collected since 2005 in this study.  
5  
6  
7  
8

### 9 10 **Socioeconomic status (SES) indicators**

11  
12 Education level and income were used as SES indicators. Education level was grouped into  
13 four categories by years completed: college or higher ( $\geq 13$  years), high school (10-12 years),  
14 middle school (7-9 years), elementary school or less ( $\leq 6$  years). The measure of income was  
15 equivalised gross household income per month, defined as household income/number of  
16 family members<sup>0.5</sup> to adjust for an effect of the number of individuals in the household; we  
17 used an equivalence scale of 0.5 for household size. We divided study subjects into four  
18 groups according to quartiles of equivalised monthly household income by gender and age  
19 (Q1-Q4; Q1, highest quartile; Q4, lowest quartile).  
20  
21  
22  
23  
24  
25  
26  
27  
28  
29  
30  
31  
32  
33

### 34 **Definition of CVD risk factors**

35  
36 Cigarette smoking was defined as a “yes” answer to both of the following questions: “Have  
37 you smoked at least 100 cigarettes in your entire life?” and “Do you smoke cigarettes now?”  
38  
39 Body mass index (BMI) was calculated as the ratio of weight to height squared ( $\text{kg}/\text{m}^2$ ).  
40  
41 Obesity was defined as a BMI of  $\geq 25 \text{ kg}/\text{m}^2$ , according to the re-defined criteria of the World  
42 Health Organization for obesity in the Asia-Pacific region.[14] Based on the criteria of the  
43 World Health Organization, diabetes was defined as fasting plasma glucose of  $\geq 126 \text{ mg}/\text{dL}$ , a  
44 previous diagnosis of diabetes by a physician, or current use of anti-hyperglycaemic agents or  
45 insulin.[15] According to the criteria of the 7<sup>th</sup> Report of the Joint National Committee,  
46 hypertension was defined as an average SBP and/or DBP  $\geq 140/90 \text{ mmHg}$  or the use of anti-  
47  
48  
49  
50  
51  
52  
53  
54  
55  
56

1  
2  
3  
4 hypertensive agents.[16] According to the guidelines for cholesterol of the NCEP ATP III,  
5  
6 hypercholesterolemia was defined as a plasma total cholesterol of  $\geq 240$  mg/dL or current use  
7  
8 of cholesterol-lowering agents.[17]  
9

### 14 **Statistical analysis**

15  
16  
17 The demographic characteristics of the study participants are presented as the means  $\pm$  SE or  
18  
19 prevalence (SE). Comparisons of the characteristics across survey periods were performed  
20  
21 using analysis of variance (ANOVA) or  $\chi^2$  test, as appropriate, and  $\chi^2$  linear trend test was  
22  
23 also used. The relative index of inequality (RII), a measure of effect that permits meaningful  
24  
25 comparisons of socioeconomic health inequalities over survey periods was computed. The  
26  
27 RII enables direct comparisons between life-course SES variables with regard to the  
28  
29 proportions of the population in different categories. To obtain the RII for each indicator of  
30  
31 SES, a score between 0 (for the highest SES) and 1 (for the lowest SES) was assigned to each  
32  
33 category based on the proportion of subjects above the midpoint in the category. For example,  
34  
35 if 10% of the subjects were in the highest educational category, participants in the group were  
36  
37 represented by the range 0–0.1 and given a score of 0.05 (half of 0.1). If 20% of the  
38  
39 population were in the next group, participants in the group were given a score of 0.20 (0.1  
40  
41 plus 0.2/2). The RII was obtained by regressing the outcome on each of the SES scores and  
42  
43 was directly interpretable for each SES indicator used to compare participants with lowest  
44  
45 SES (1) with those with the highest SES (0). In this study, the RII of major CVD risk factors  
46  
47 is presented using the odds ratio and 95% confidence interval computed from binary logistic  
48  
49 regression analysis. Trends in the RII were estimated by including an interaction term for the  
50  
51 SES indicator and a variable that identified the year of the data in the model. Significance  
52  
53  
54  
55  
56

1  
2  
3  
4 levels were set at a two-tailed p-value <0.05. All analyses were conducted using the SAS  
5  
6 software version 9.4 (SAS Institute, Cary, NC).  
7  
8  
9

## 10 11 12 **RESULTS**

13  
14  
15 The general characteristics of participants in the KNHANES II (2001) to VI (2013-2014) are  
16  
17 shown in Table 1. The mean age of participants increased over time ( $41.2 \pm 0.2$  to  $43.8 \pm 0.2$   
18  
19 years and  $41.6 \pm 0.2$  to  $44.2 \pm 0.2$  years for men and women, respectively). The proportion of  
20  
21 participants with college or higher education ( $\geq 13$  years) increased gradually, from 39% to 47%  
22  
23 for men and from 24% to 39% for women from 2001 to 2014.  
24  
25  
26  
27  
28  
29

### 30 **Smoking**

31  
32 Over the past 14 years, smoking rate decreased significantly, from 65% to 47% in men,  
33  
34 whereas it increased from 3.7% to 5.6% in women (Supplementary Table 1). Low SES was  
35  
36 associated with a high prevalence of smoking in both genders (Table 2). Among Korean men,  
37  
38 time trends in socioeconomic inequalities in smoking by education and income levels were  
39  
40 generally stable during 2001-2014. In contrast, a significantly increasing trend in  
41  
42 socioeconomic inequalities with regard to smoking was noted among women (Table 2).  
43  
44  
45  
46  
47  
48

### 49 **Obesity**

50  
51 In men, there were significant increased trends of mean BMI ( $23.9 \text{ kg/m}^2$  in 2001 and  $24.6$   
52  
53  $\text{kg/m}^2$  in 2014,  $p < 0.001$ ) and the prevalence of obesity (34% for 2001 and 41% for 2014,  $p <$   
54  
55  
56  
57  
58  
59  
60

Table 1 General characteristics of the study population (25-64 years of age) from 2001 to 2014

|                | KNHANES*   |             |              |              |               | P-value† |
|----------------|------------|-------------|--------------|--------------|---------------|----------|
|                | II<br>2001 | III<br>2005 | IV<br>2007-9 | V<br>2010-12 | VI<br>2013-14 |          |
| <b>Men</b>     |            |             |              |              |               |          |
| n              | 3164       | 2868        | 5318         | 5501         | 3315          |          |
| Age            | 41.2±0.2   | 41.1±0.3    | 42.4±0.2     | 43.1±0.2     | 43.8±0.2      | <0.001   |
| BMI            | 23.9±0.1   | 24.2±0.1    | 24.3±0.1     | 24.3±0.1     | 24.6±0.1      | <0.001   |
| Education (yr) |            |             |              |              |               | <0.001   |
| ≤6             | 9.4 (0.8)  | 8.3 (0.6)   | 9.6 (0.5)    | 8.3 (0.5)    | 7.2 (0.6)     |          |
| 7-9            | 12.1 (0.7) | 10.0 (0.7)  | 10.5 (0.5)   | 10.1 (0.5)   | 8.8 (0.6)     |          |
| 10-12          | 39.8 (1.2) | 42.4 (1.2)  | 39.4 (0.9)   | 38.6 (0.8)   | 36.9 (1.1)    |          |
| ≥13            | 38.7 (1.6) | 39.2 (1.4)  | 40.5 (1.0)   | 43.0 (0.9)   | 47.1 (1.2)    |          |
| Income‡        |            |             |              |              |               | 0.234    |
| Q1             | 22.3 (1.3) | 26.7 (1.2)  | 24.8 (0.8)   | 26.5 (0.8)   | 25.0 (1.0)    |          |
| Q2             | 24.0 (1.0) | 25.2 (1.0)  | 24.2 (0.7)   | 25.6 (0.8)   | 26.0 (0.9)    |          |
| Q3             | 26.6 (1.0) | 23.1 (0.9)  | 25.4 (0.7)   | 24.5 (0.7)   | 24.7 (0.9)    |          |
| Q4             | 27.0 (1.4) | 25.0 (1.3)  | 25.7 (1.0)   | 23.5 (0.8)   | 24.2 (1.2)    |          |
| <b>Women</b>   |            |             |              |              |               |          |
| n              | 3509       | 3276        | 7048         | 7410         | 4497          |          |
| Age            | 41.6±0.3   | 41.6±0.3    | 42.7±0.2     | 43.5±0.2     | 44.2±0.2      | <0.001   |
| BMI            | 23.4±0.1   | 23.4±0.1    | 23.2±0.1     | 23.3±0.1     | 23.1±0.1      | 0.018    |
| Education      |            |             |              |              |               | <0.001   |
| ≤6             | 19.2 (1.1) | 17.3 (0.9)  | 17.2 (0.6)   | 15.5 (0.6)   | 12.5 (0.7)    |          |
| 7-9            | 14.6 (0.7) | 13.2 (0.7)  | 12.3 (0.5)   | 11.6 (0.5)   | 10.2 (0.5)    |          |
| 10-12          | 42.2 (1.1) | 42.0 (1.3)  | 40.6 (0.7)   | 38.9 (0.8)   | 38.3 (0.9)    |          |
| ≥13            | 24.1 (1.4) | 27.6 (1.5)  | 29.9 (0.9)   | 34.0 (0.9)   | 39.1 (1.1)    |          |
| Income‡        |            |             |              |              |               | 0.133    |
| Q1             | 23.1 (1.3) | 25.9 (1.1)  | 24.3 (0.8)   | 27.6 (0.8)   | 24.7 (0.9)    |          |
| Q2             | 24.0 (0.9) | 25.7 (1.0)  | 25.3 (0.7)   | 25.8 (0.7)   | 25.0 (0.9)    |          |
| Q3             | 26.1 (0.9) | 24.2 (0.9)  | 25.2 (0.7)   | 24.4 (0.7)   | 25.1 (0.9)    |          |
| Q4             | 26.9 (1.5) | 24.2 (1.3)  | 25.2 (0.9)   | 22.3 (0.7)   | 25.2 (1.2)    |          |

Values given are n, prevalence (SE) or mean ± SE

\*KNHANES (Korean National Health and Nutrition Examination Survey)

†P-value by ANOVA or  $\chi^2$  test

‡Quartiles based on household income (10<sup>4</sup> KRW)

Table 2 Age-adjusted odds ratios (OR) and 95% confidence interval (CI) and relative indices of inequalities (RII) in smoking by SES from 2001 to 2014

|                | KNHANES          |                  |                  |                  |                   |
|----------------|------------------|------------------|------------------|------------------|-------------------|
|                | II<br>2001       | III<br>2005      | IV<br>2007-9     | V<br>2010-12     | VI<br>2013-14     |
| <b>Men</b>     |                  |                  |                  |                  |                   |
| Education (yr) |                  |                  |                  |                  |                   |
| ≥13            | 1                | 1                | 1                | 1                | 1                 |
| 10-12          | 1.75 (1.45-2.12) | 1.86 (1.53-2.25) | 1.57 (1.37-1.81) | 1.47 (1.27-1.71) | 1.48 (1.23-1.78)  |
| 7-9            | 1.48 (1.14-1.93) | 1.57 (1.13-2.18) | 2.16 (1.72-2.71) | 1.62 (1.27-2.05) | 1.25 (0.92-1.72)  |
| ≤6             | 2.41 (1.72-3.37) | 2.22 (1.62-3.05) | 1.95 (1.53-2.48) | 1.71 (1.32-2.22) | 1.77 (1.26-2.49)  |
| RII (95% CI)   | 2.73 (1.97-3.79) | 2.75 (2.00-3.79) | 2.74 (2.16-3.48) | 2.16 (1.69-2.77) | 2.17 (1.57-3.00)  |
| P for trend    | 0.193            |                  |                  |                  |                   |
| Income         |                  |                  |                  |                  |                   |
| Q1             | 1                | 1                | 1                | 1                | 1                 |
| Q2             | 1.23 (0.97-1.55) | 1.34 (1.05-1.72) | 1.31 (1.11-1.56) | 1.09 (0.91-1.30) | 1.26 (1.00-1.59)  |
| Q3             | 1.49 (1.17-1.91) | 1.50 (1.21-1.86) | 1.56 (1.32-1.85) | 1.23 (1.01-1.49) | 1.34 (1.07-1.66)  |
| Q4             | 1.74 (1.35-2.24) | 1.87 (1.46-2.40) | 1.79 (1.51-2.12) | 1.50 (1.24-1.81) | 1.43 (1.15-1.79)  |
| RII (95% CI)   | 2.10 (1.53-2.89) | 2.22 (1.63-3.02) | 2.16 (1.74-2.68) | 1.71 (1.34-2.18) | 1.57 (1.19-2.08)  |
| P for trend    | 0.087            |                  |                  |                  |                   |
| <b>Women</b>   |                  |                  |                  |                  |                   |
| Education (yr) |                  |                  |                  |                  |                   |
| ≥13            | 1                | 1                | 1                | 1                | 1                 |
| 10-12          | 1.25 (0.75-2.09) | 3.69 (2.07-6.57) | 3.95 (2.78-5.62) | 2.80 (1.97-4.00) | 4.08 (2.67-6.22)  |
| 7-9            | 1.55 (0.76-3.15) | 4.04 (1.95-8.34) | 6.47 (3.90-10.7) | 6.15 (3.65-10.4) | 7.75 (4.12-14.6)  |
| ≤6             | 1.98 (1.00-3.90) | 4.12 (1.92-8.86) | 7.59 (4.42-13.0) | 5.52 (3.06-9.9)  | 9.53 (4.88-18.6)  |
| RII (95% CI)   | 1.75 (0.87-3.52) | 3.41 (1.78-6.55) | 8.27 (5.05-13.6) | 6.81 (3.86-12.0) | 10.29 (5.23-20.2) |
| P for trend    | <0.001           |                  |                  |                  |                   |
| Income         |                  |                  |                  |                  |                   |
| Q1             | 1                | 1                | 1                | 1                | 1                 |
| Q2             | 0.53 (0.29-0.95) | 1.05 (0.58-1.91) | 0.95 (0.64-1.42) | 0.98 (0.66-1.46) | 1.54 (0.82-2.89)  |
| Q3             | 0.67 (0.39-1.13) | 1.50 (0.90-2.51) | 1.46 (1.02-2.09) | 1.48 (0.99-2.23) | 2.28 (1.29-4.00)  |
| Q4             | 1.53 (0.95-2.47) | 2.74 (1.68-4.46) | 2.23 (1.57-3.17) | 2.53 (1.75-3.65) | 3.95 (2.34-6.66)  |
| RII (95% CI)   | 1.92 (0.88-4.21) | 4.45 (2.26-8.76) | 3.36 (2.10-5.39) | 4.11 (2.46-6.88) | 6.27 (3.22-12.20) |
| P for trend    | 0.043            |                  |                  |                  |                   |

0.001) over time (Table 1 and Supplementary Table 1). In contrast, women showed decreasing trends in mean BMI and the prevalence of obesity (23.4 kg/m<sup>2</sup> in 2001 and 23.1 kg/m<sup>2</sup> in 2014, p=0.018, 29% in 2001 and 25% in 2014, p=0.01; Table 1 and Supplementary Table 1). Time trends in socioeconomic inequalities in obesity were stable among men; however, a time trend toward increasing inequality in obesity by income was noted in women (1.72, 1.19-2.48 in 2001; 2.69, 2.02-3.59 in 2014, p=0.03, RII, 95% CI, respectively; Table 3).

### Diabetes

In men, the prevalence of diabetes increased over time (6.8% in 2001, 10.4% in 2014, p <0.001). In contrast, the prevalence did not change significantly in women (Supplementary Table 1). Although no significant time trends in socioeconomic inequalities was seen in men, significantly increasing inequality in diabetes were noticed in women, especially by income (0.76, 0.36-1.58 in 2001; 2.56, 1.55-4.22 in 2014, RII, 95% CI, p=0.01, respectively; Table 4).

### Hypertension

The prevalence of hypertension did not change significantly over time in either gender (Supplementary Table 1); however, there were gender differences in the time trend with regard to socioeconomic inequalities in hypertension (Table 5). In men, socioeconomic differences decreased with income over the past 14 years (1.64, 1.09-2.49 in 2001; 0.99, 0.71-1.39 in 2014, RII, 95% CI, p=0.04), whereas inequalities increased with marginal significance among women in the same period (1.48, 0.89-2.46 in 2001; 2.91, 1.98-4.29 in 2014, RII, 95% CI, p=0.06, by education; 1.22, 0.73-2.04 in 2001; 2.32, 1.63-3.30 in 2014, RII, 95% CI, p=0.056, by income, respectively; Table 5).

Table 3 Age-adjusted OR, 95% CI and RII in obesity by SES from 2001 to 2014

|                | KNHANES          |                  |                  |                  |                  |
|----------------|------------------|------------------|------------------|------------------|------------------|
|                | II<br>2001       | III<br>2005      | IV<br>2007-9     | V<br>2010-12     | VI<br>2013-14    |
| <b>Men</b>     |                  |                  |                  |                  |                  |
| Education (yr) |                  |                  |                  |                  |                  |
| ≥13            | 1                | 1                | 1                | 1                | 1                |
| 10-12          | 0.96 (0.78-1.20) | 0.86 (0.66-1.12) | 0.91 (0.79-1.04) | 0.89 (0.76-1.04) | 1.03 (0.86-1.23) |
| 7-9            | 0.90 (0.64-1.26) | 0.90 (0.57-1.44) | 0.80 (0.65-1.00) | 0.88 (0.67-1.14) | 0.94 (0.68-1.30) |
| ≤6             | 0.83 (0.55-1.23) | 0.43 (0.27-0.67) | 0.74 (0.58-0.93) | 0.64 (0.48-0.84) | 0.80 (0.57-1.11) |
| RII (95% CI)   | 0.95 (0.66-1.38) | 0.63 (0.40-0.98) | 0.74 (0.58-0.94) | 0.79 (0.60-1.03) | 0.98 (0.72-1.34) |
| P for trend    | 0.673            |                  |                  |                  |                  |
| Income         |                  |                  |                  |                  |                  |
| Q1             | 1                | 1                | 1                | 1                | 1                |
| Q2             | 1.15 (0.88-1.51) | 0.89 (0.63-1.26) | 1.02 (0.86-1.21) | 0.89 (0.73-1.08) | 0.90 (0.73-1.10) |
| Q3             | 0.92 (0.70-1.20) | 0.71 (0.52-0.97) | 1.02 (0.84-1.23) | 0.97 (0.81-1.17) | 1.15 (0.91-1.44) |
| Q4             | 1.11 (0.83-1.47) | 0.76 (0.55-1.06) | 0.96 (0.80-1.15) | 0.74 (0.61-0.90) | 0.85 (0.69-1.05) |
| RII (95% CI)   | 1.02 (0.71-1.45) | 0.66 (0.43-1.02) | 0.95 (0.75-1.20) | 0.72 (0.57-0.92) | 0.91 (0.70-1.20) |
| P for trend    | 0.778            |                  |                  |                  |                  |
| <b>Women</b>   |                  |                  |                  |                  |                  |
| Education (yr) |                  |                  |                  |                  |                  |
| ≥13            | 1                | 1                | 1                | 1                | 1                |
| 10-12          | 2.64 (1.93-3.60) | 1.99 (1.43-2.77) | 1.74 (1.46-2.08) | 1.90 (1.59-2.28) | 1.76 (1.43-2.18) |
| 7-9            | 5.53 (3.83-7.98) | 2.84 (1.86-4.34) | 2.49 (1.98-3.12) | 2.45 (1.92-3.12) | 2.92 (2.16-3.96) |
| ≤6             | 3.79 (2.52-5.72) | 3.42 (2.28-5.15) | 3.55 (2.81-4.50) | 2.65 (2.09-3.37) | 3.99 (2.92-5.45) |
| RII (95% CI)   | 3.19 (2.23-4.57) | 3.45 (2.17-5.47) | 3.57 (2.83-4.51) | 2.93 (2.29-3.73) | 4.01 (2.94-5.49) |
| P for trend    | 0.617            |                  |                  |                  |                  |
| Income         |                  |                  |                  |                  |                  |
| Q1             | 1                | 1                | 1                | 1                | 1                |
| Q2             | 1.17 (0.90-1.51) | 1.50 (1.06-2.11) | 1.05 (0.87-1.26) | 1.32 (1.07-1.63) | 1.65 (1.29-2.10) |
| Q3             | 1.30 (0.97-1.73) | 1.43 (1.03-1.98) | 1.48 (1.24-1.77) | 1.51 (1.25-1.83) | 1.97 (1.58-2.47) |
| Q4             | 1.53 (1.15-2.03) | 1.63 (1.16-2.29) | 1.61 (1.34-1.93) | 1.88 (1.54-2.29) | 2.21 (1.74-2.81) |
| RII (95% CI)   | 1.72 (1.19-2.48) | 1.73 (1.15-2.61) | 2.03 (1.61-2.56) | 2.21 (1.73-2.83) | 2.69 (2.02-3.59) |
| P for trend    | 0.032            |                  |                  |                  |                  |

Table 4 Age-adjusted OR, 95% CI and RII in diabetes by SES from 2005 to 2014

|                | KNHAENS          |                  |                  |                  |
|----------------|------------------|------------------|------------------|------------------|
|                | III<br>2005      | IV<br>2007-9     | V<br>2010-12     | VI<br>2013-14    |
| <b>Men</b>     |                  |                  |                  |                  |
| Education (yr) |                  |                  |                  |                  |
| ≥13            | 1                | 1                | 1                | 1                |
| 10-12          | 1.21 (0.72-2.03) | 0.98 (0.74-1.28) | 1.39 (1.05-1.85) | 1.14 (0.82-1.57) |
| 7-9            | 1.20 (0.64-2.25) | 1.05 (0.73-1.52) | 1.41 (0.96-2.06) | 1.13 (0.71-1.81) |
| ≤6             | 1.42 (0.77-2.59) | 0.92 (0.64-1.32) | 1.30 (0.88-1.90) | 1.06 (0.65-1.73) |
| RII (95% CI)   | 1.41 (0.72-2.77) | 0.91 (0.59-1.40) | 1.38 (0.91-2.09) | 1.09 (0.64-1.85) |
| P for trend    | 0.838            |                  |                  |                  |
| Income         |                  |                  |                  |                  |
| Q1             | 1                | 1                | 1                | 1                |
| Q2             | 0.53 (0.30-0.93) | 1.12 (0.81-1.56) | 0.76 (0.54-1.07) | 0.86 (0.58-1.30) |
| Q3             | 0.84 (0.49-1.43) | 0.96 (0.69-1.32) | 0.90 (0.64-1.27) | 1.06 (0.73-1.55) |
| Q4             | 0.93 (0.57-1.53) | 1.48 (1.09-2.01) | 1.06 (0.77-1.46) | 1.34 (0.92-1.95) |
| RII (95% CI)   | 1.08 (0.53-2.18) | 1.53 (1.02-2.30) | 1.17 (0.76-1.79) | 1.55 (0.95-2.56) |
| P for trend    | 0.557            |                  |                  |                  |
| <b>Women</b>   |                  |                  |                  |                  |
| Education (yr) |                  |                  |                  |                  |
| ≥13            | 1                | 1                | 1                | 1                |
| 10-12          | 2.69 (1.11-6.53) | 2.04 (1.28-3.23) | 2.10 (1.30-3.40) | 1.38 (0.89-2.12) |
| 7-9            | 3.30 (1.00-10.9) | 1.76 (1.02-3.05) | 2.23 (1.26-3.96) | 1.76 (1.02-3.02) |
| ≤6             | 4.33 (1.42-13.3) | 3.29 (1.93-5.59) | 2.85 (1.62-5.02) | 1.68 (0.99-2.87) |
| RII (95% CI)   | 3.69 (0.99-13.8) | 3.33 (1.99-5.57) | 2.61 (1.57-4.35) | 1.92 (1.14-3.23) |
| P for trend    | 0.254            |                  |                  |                  |
| Income         |                  |                  |                  |                  |
| Q1             | 1                | 1                | 1                | 1                |
| Q2             | 0.86 (0.46-1.59) | 1.06 (0.70-1.59) | 1.84 (1.21-2.79) | 1.13 (0.72-1.78) |
| Q3             | 1.10 (0.62-1.98) | 1.75 (1.23-2.50) | 2.36 (1.55-3.57) | 1.23 (0.79-1.91) |
| Q4             | 0.71 (0.39-1.31) | 1.99 (1.39-2.87) | 2.56 (1.72-3.82) | 2.04 (1.38-3.01) |
| RII (95% CI)   | 0.76 (0.36-1.58) | 2.80 (1.77-4.42) | 2.90 (1.89-4.47) | 2.56 (1.55-4.22) |
| P for trend    | 0.015            |                  |                  |                  |



Table 5 Age-adjusted OR, 95% CI and RII of hypertension by SES from 2001 to 2014

|                | KHANES           |                  |                  |                  |                  |
|----------------|------------------|------------------|------------------|------------------|------------------|
|                | II<br>2001       | III<br>2005      | IV<br>2007-9     | V<br>2010-12     | VI<br>2013-14    |
| <b>Men</b>     |                  |                  |                  |                  |                  |
| Education (yr) |                  |                  |                  |                  |                  |
| ≥13            | 1                | 1                | 1                | 1                | 1                |
| 10-12          | 1.43 (1.08-1.89) | 1.03 (0.75-1.40) | 1.03 (0.86-1.25) | 1.15 (0.97-1.38) | 0.97 (0.78-1.22) |
| 7-9            | 1.22 (0.84-1.78) | 1.50 (0.96-2.36) | 0.98 (0.77-1.24) | 1.12 (0.87-1.44) | 0.93 (0.69-1.24) |
| ≤6             | 1.17 (0.77-1.79) | 1.31 (0.85-2.02) | 1.08 (0.84-1.40) | 1.15 (0.89-1.49) | 1.01 (0.70-1.47) |
| RII (95% CI)   | 1.34 (0.88-2.03) | 1.41 (0.90-2.20) | 1.08 (0.82-1.42) | 1.16 (0.88-1.52) | 0.93 (0.66-1.32) |
| P for trend    | 0.133            |                  |                  |                  |                  |
| Income         |                  |                  |                  |                  |                  |
| Q1             | 1                | 1                | 1                | 1                | 1                |
| Q2             | 1.21 (0.86-1.69) | 0.87 (0.59-1.29) | 1.09 (0.88-1.35) | 1.13 (0.91-1.42) | 1.28 (0.95-1.71) |
| Q3             | 1.10 (0.76-1.59) | 0.95 (0.70-1.29) | 1.11 (0.89-1.39) | 1.11 (0.89-1.37) | 1.09 (0.83-1.43) |
| Q4             | 1.58 (1.14-2.19) | 1.23 (0.90-1.69) | 1.23 (0.99-1.54) | 1.11 (0.89-1.38) | 1.05 (0.80-1.39) |
| RII (95% CI)   | 1.64 (1.09-2.49) | 1.37 (0.91-2.06) | 1.30 (0.99-1.71) | 1.11 (0.85-1.46) | 0.99 (0.71-1.39) |
| P for trend    | 0.042            |                  |                  |                  |                  |
| <b>Women</b>   |                  |                  |                  |                  |                  |
| Education (yr) |                  |                  |                  |                  |                  |
| ≥13            | 1                | 1                | 1                | 1                | 1                |
| 10-12          | 1.55 (0.93-2.61) | 1.91 (1.14-3.18) | 2.21 (1.62-3.02) | 1.69 (1.32-2.17) | 1.80 (1.30-2.47) |
| 7-9            | 2.64 (1.47-4.76) | 2.90 (1.60-5.25) | 2.50 (1.76-3.55) | 2.15 (1.58-2.92) | 2.59 (1.78-3.77) |
| ≤6             | 1.79 (0.99-3.24) | 3.18 (1.68-5.99) | 2.69 (1.91-3.80) | 2.45 (1.83-3.30) | 3.06 (2.10-4.46) |
| RII (95% CI)   | 1.48 (0.89-2.46) | 2.11 (1.21-3.69) | 1.93 (1.38-2.70) | 2.15 (1.56-2.97) | 2.91 (1.98-4.29) |
| P for trend    | 0.060            |                  |                  |                  |                  |
| Income         |                  |                  |                  |                  |                  |
| Q1             | 1                | 1                | 1                | 1                | 1                |
| Q2             | 1.48 (1.06-2.07) | 1.37 (0.92-2.05) | 0.99 (0.80-1.23) | 1.04 (0.82-1.33) | 1.44 (1.04-1.98) |
| Q3             | 1.15 (0.78-1.69) | 1.33 (0.92-1.93) | 1.25 (1.00-1.55) | 1.29 (1.01-1.65) | 2.33 (1.74-3.13) |
| Q4             | 1.29 (0.85-1.94) | 1.50 (0.99-2.28) | 1.39 (1.11-1.76) | 1.41 (1.11-1.78) | 1.73 (1.28-2.36) |
| RII (95% CI)   | 1.22 (0.73-2.04) | 1.62 (0.97-2.71) | 1.63 (1.20-2.22) | 1.65 (1.23-2.21) | 2.32 (1.63-3.30) |
| P for trend    | 0.056            |                  |                  |                  |                  |

## Hypercholesterolemia

The prevalence of hypercholesterolemia increased over time in both genders (Supplementary Table 1). However, there was no significant association between SES and hypercholesterolemia in either gender (Supplementary Table 2).

## DISCUSSION

The result of this study reflected gender differences not only in the relationships between major CVD risk factors and SES, but also in the linear time trends in socioeconomic inequalities in major CVD risk factors among Koreans. Among men, no major CVD risk factors except smoking showed significant associations with SES. Indeed, socioeconomic inequalities in major CVD risk factors were stable over time and inequality in hypertension decreased over the past 14 years. However, women with a lower SES had higher risks of smoking, obesity, diabetes and hypertension than did those with a higher SES. Increasing trends in socioeconomic inequalities in smoking, obesity and diabetes, especially measured by income, were noted in Korean women. In contrast to the other CVD risk factors, hypercholesterolemia was not associated with socioeconomic inequalities in either gender.

Socioeconomic inequalities in CVD risk factors and disease-related mortality are well known in Western industrialised countries and are now being found in many developing countries as well.[1-2, 18-19] However, there has been relatively little research examining time trends in socioeconomic inequalities in these CVD risk factors.[6-8] To our knowledge, this is the first report on trend in socioeconomic inequalities in major CVD risk factors in an Asian nations.

In this study, distinct gender differences in time trend in smoking rates were found between

1  
2  
3  
4 Korean men and women, which is consistent with trends in other Asian countries, such as  
5  
6 China and Taiwan.[20-21] Over the past 14 years, the smoking rate in men decreased,  
7  
8 whereas, it increased in women. Consistent with previous reports, our study showed that  
9  
10 Koreans with a lower SES had higher smoking rates than those with a higher SES in both  
11  
12 genders.[22-23] However, our study further showed gender differences in the time trend of  
13  
14 smoking inequality. Based on the RII trend, the trend in inequality was stable among men,  
15  
16 but the socioeconomic gap among women widened. There has been significant progress with  
17  
18 anti-smoking policies in Korea in recent years. In 1995, the Health Promotion Act was  
19  
20 enacted and restricted smoking in public buildings and places. In 2004, a significant increase  
21  
22 in taxation of tobacco products began.[24] We suspect that these policies may have been  
23  
24 effective among men in all socioeconomic groups, but they were ineffective for women with  
25  
26 a lower SES.  
27  
28  
29

30  
31 Over the past 14 years, the prevalence of obesity has increased in men, but it has decreased in  
32  
33 women. Among men, SES was not associated with the prevalence of obesity; however, lower  
34  
35 SES was associated with a higher prevalence of obesity in women, reflecting gender  
36  
37 differences in attitudes towards body image in Korea.[25-26] A previous study reported that  
38  
39 according to the recent International Health Behavior Survey of university students in 22  
40  
41 countries, the country with highest proportion of respondents who reported 'trying to lose  
42  
43 weight' was Korea.[27] We also found increased socioeconomic inequality in obesity  
44  
45 according to income in Korean women. This could be related to increased sensitivity about  
46  
47 obesity in Korean women such that those who had financial ability may have engaged in  
48  
49 weight- reduction efforts.  
50  
51  
52

53  
54 The prevalence of diabetes increased in men but showed no change in women during the  
55  
56

1  
2  
3  
4 study period. Our study found gender differences in association between SES and the  
5  
6 prevalence of diabetes, which is consistent with previous studies that reported the influence  
7  
8 of SES on the risk of diabetes was more pronounced in women than in men.[19, 28-30] To  
9  
10 our knowledge, there is no previous study investigating time trends in socioeconomic  
11  
12 inequalities in diabetes in Koreans. The inequality in diabetes in women, measured by  
13  
14 income, increased during the past 14 years, which is consistent with previous studies in other  
15  
16 countries.[31-32] Although the reasons for this gender-related difference remain unclear,  
17  
18 several plausible explanations that relate low SES to an increased risk of diabetes in women  
19  
20 can be proposed. Socioeconomic inequalities may cause differing lifestyle behaviours, such  
21  
22 as alcohol intake and physical activity. Women with a lower SES have higher risk of harmful  
23  
24 alcohol consumption, smoking and lack of physical activity.[3, 33-34] It may also be related  
25  
26 to less social support and poorer access to healthcare services, leading to lower level of the  
27  
28 detection and treatment of diabetes and associated risk factors.[35] Finally, women with a  
29  
30 lower SES may have poor eating habits, such as less intake of fruits and vegetables.[36]  
31  
32  
33  
34

35  
36 During the study period, the prevalence of hypertension showed no change in either gender,  
37  
38 however, the pattern of associations between SES and risk of hypertension differed by gender,  
39  
40 which is consistent with a previous study.[37] The influence of low SES on hypertension was  
41  
42 more prominent in women, socioeconomic inequalities widened with marginal statistical  
43  
44 significance in women during study period. In contrast, the socioeconomic inequality in men  
45  
46 was decreased, although the reason for alleviating inequality was not clear. One possible  
47  
48 explanation is the diminished inequality with respect to smoking with marginal statistical  
49  
50 significance in men during the study period.  
51  
52

53  
54 Trends in socioeconomic inequalities in obesity and diabetes among women increased by  
55  
56

1  
2  
3  
4 income level, but they were not significant when measured by education. Rapid social change  
5  
6 has affected the meaning of education level; for example, the proportion of women who had  
7  
8 an education level of college or above was 24% in KNHANES II (2001). However, it was  
9  
10 ~40% in KNHANES VI (2013-2014). Thus, caution is needed in comparing education groups  
11  
12 across time, especially in rapidly changing societies. Additionally, it may be better to divide  
13  
14 education level into equal division to investigate health inequalities.[26, 38]  
15  
16

17  
18 Two strengths of our study is that study subjects were a nationally representative sample and  
19  
20 that time trends of the relationship between SES and five CVD major risk factors were  
21  
22 examined using two SES measures (education level, household income). However, several  
23  
24 limitations also be noted. First, the study was cross-sectional in nature; thus, it was difficult to  
25  
26 determine causal relationships between SES and CVD risk factors. Second, the KNHANES is  
27  
28 a self-report survey and therefore prone to measurement error and recall bias as well as  
29  
30 heterogeneity in self-reported health. Third, the steady decline in response rates in the  
31  
32 KNHANES should not be overlooked, although there has been no reported indication of  
33  
34 potential selection bias from the KCDC.[39] Finally, we could not examine longer-term  
35  
36 trends in socioeconomic inequalities in CVD risk factors before 2001, because, following the  
37  
38 author' judgement, the KNHANES I (1998) survey data were excluded due to lack of  
39  
40 reliability.  
41  
42  
43  
44  
45  
46  
47

## 48 **CONCLUSIONS**

49  
50  
51 This study found that relationships between SES and major risk factors (smoking, obesity,  
52  
53 diabetes, hypertension) were more prominent in Korean women than men. Inequalities,  
54  
55

1  
2  
3  
4 especially measured by income, in smoking, obesity and diabetes increased among Korean  
5  
6 women over the past 14 years. Public policies should be implemented to prevent those risk  
7  
8 factors for CVD among Korean women with a lower SES.  
9

10  
11  
12  
13  
14 **Contributors** YJK, SGK, JL and JSL developed the research questions and contributed to  
15  
16 the development of the conceptual framework, and the interpretations of the results. YJK  
17  
18 contributed to writing and submitting the manuscript. JSL performed the main analyses and  
19  
20 critical revisions to the manuscript. JP provided theoretical support and DSC, DMK, KL and  
21  
22 HYK assisted with writing the manuscript.  
23

24  
25  
26 **Funding** No funding  
27

28  
29 **Competing interests** None declared.  
30

31  
32 **Ethical approval** All procedures and protocols of the study were approved by the  
33  
34 institutional review board of Korea Centers for Disease Control and Prevention (KCDC)  
35  
36 since 2007. Written informed consent regarding the survey and blood analysis has been  
37  
38 obtained from all participants since 2001.  
39

40  
41 **Provenance and peer review** Not commissioned; externally peer reviewed.  
42

43  
44 **Data sharing statement** No additional data are available.  
45  
46  
47  
48  
49  
50  
51  
52  
53  
54  
55  
56  
57  
58  
59  
60

## REFERENCES

1. Strand BH, Tverdal A. Can cardiovascular risk factors and lifestyle explain the educational inequalities in mortality from ischaemic heart disease and from other heart diseases? 26-year follow-up of 50,000 Norwegian men and women. *J Epidemiol Community Health* 2004;58:705-9.
2. Bennett S. Socioeconomic inequalities in coronary heart disease and stroke mortality among Australian men, 1979-1993. *Int J Epidemiol* 1996;25:266-75.
3. Kaplan GA, Lynch JW. Socioeconomic factors and cardiovascular disease: a review of the literature. *Circulation* 1993;88:1973-98.
4. Mackenbach JP, Gunning-Schepers LJ. How should interventions to reduce inequalities in health be evaluated? *J Epidemiol Community Health* 1997;51(4):359-64.
5. Cooper R, Cutler J, Desvigne-Nickens P, *et al.* Trends and disparities in coronary heart disease, stroke, and other cardiovascular diseases in the United States. Findings of the National Conference on Cardiovascular Disease Prevention. *Circulation* 2000;102:3137-47.
6. Kanjilal S, Gregg EW, Cheng YJ, *et al.* Socioeconomic status and trends in disparities in 4 major risk factors for cardiovascular disease among US adults, 1971-2002. *Arch Intern Med* 2006;166(21):2348-55.
7. Bartley M, Fitzpatrick R, Firth D, *et al.* Social distribution of cardiovascular disease risk factors: changes among men in England 1984-1993. *J Epidemiol Community Health* 2000;54(11):806-14.
8. Bennett S. Cardiovascular risk factors in Australia: trends in socioeconomic inequalities. *J*

1  
2  
3  
4 *Epidemiol Community Health* 1995;49(4):363-72.

5  
6  
7 9. National Statistical Office of Korea.

8  
9 [http://kosis.kr/statHtml/statHtml.do?orgId=101&tblId=DT\_2AS017&vw\_cd=MT\_RTITLE  
10 &list\_id=R\_SUB\_OTITLE\_OTIT\_WBTIT\_4004&seqNo=&lang\_mode=ko&language=kor  
11 &obj\_var\_id=&itm\_id=&conn\_path=E1](Accessed 31/07/2016)

12  
13  
14  
15  
16 10. Kang SW, Shin YS, Lee TJ, *et al.* A study on social polarization in Korea. Korea Institute  
17 for Health and Social Affairs; 2006 (Korean).

18  
19  
20  
21 11. Kweon S, Kim Y, Jang MJ, *et al.* Data resource profile: the Korea National Health and  
22 Nutrition Examination Survey (KNHANES). *Int J Epidemiol* 2014;43:69-77.

23  
24  
25  
26 12. Choi YJ, Kim HC, Kim HM, *et al.* Prevalence and management of diabetes in Korean  
27 adults: Korean National Health and Nutrition Examination Surveys 1998-2005. *Diabetes*  
28 *Care* 2009;32(11):2016-20.

29  
30  
31  
32  
33 13. Kim HJ, Kim Y, Cho Y, *et al.* Trends in the prevalence of major cardiovascular disease  
34 risk factors among Korean adults: results from the Korean National Health and Nutrition  
35 Examination Survey, 1998-2012. *Int J Cardiol* 2014;174(1):64-72.

36  
37  
38  
39  
40  
41 14. Steering Committee of the Western Pacific Region of the World Health Organization.  
42 The International Association for the Study of Obesity and the International Obesity Task  
43 Force. The Asia-Pacific perspective: redefining obesity and its treatment. Melbourne: Health  
44 Communications Australia Pty Ltd.; 2000:8-55.

45  
46  
47  
48  
49  
50 15. World Health Organization. Definition, diagnosis and classification of diabetes mellitus  
51 and its complication. Geneva: World Health Organization; 2001.



- 1  
2  
3  
4 16. U.S. Department of Health and Human Services. The seventh report of the joint National  
5  
6 Committee on Prevention, Detection, Evaluation, and Treatment of High Blood Pressure  
7  
8 (JNC-7). Bethesda, MD: National Institutes of Health; 2004.  
9  
10  
11 17. National Institutes of Health. Third report of the National Cholesterol Education Program  
12  
13 (NCEP) Expert Panel on Detection, evaluation, and Treatment of High Blood Cholesterol in  
14  
15 Adults (Adult Treatment Panel III). Bethesda, MD: National Institutes of Health; 2002.  
16  
17  
18 18. Fateh M, Emamian MH, *et al.* Socioeconomic inequality in hypertension in Iran. *J*  
19  
20 *Hypertens* 2014;32(9):1782-8.  
21  
22  
23 19. Kim YJ, Jeon JY, Han SJ, *et al.* Effect of socio-economic status on the prevalence of  
24  
25 diabetes. *Yonsei Med J* 2015;56(3):641-7.  
26  
27  
28 20. Yang G, Fan L, Tan J, *et al.* Smoking in China: findings of the 1996 National prevalence  
29  
30 survey. *JAMA* 1999;282(13):1247-53.  
31  
32  
33 21. Wen CP, Levy DT, Cheng TY, *et al.* Smoking behavior in Taiwan, 2001. *Tob Control*  
34  
35 2005;14 Suppl 1:i51-5.  
36  
37  
38 22. Khang YH, Cho HJ. Socioeconomic inequality in cigarette smoking: trends by gender,  
39  
40 age, and socioeconomic position in South Korea, 1989-2003. *Prev Med* 2006;42(6):415-22.  
41  
42  
43 23. Cho HJ, Song YM, Smith GD, *et al.* Trends in socio-economic differentials in cigarette  
44  
45 smoking behavior between 1990 and 1998: a large prospective study in Korean men. *Public*  
46  
47 *Health* 2004;118:553-8.  
48  
49  
50 24. Kim YI, Kang KH, Lee KS, *et al.* Increase in cigarette taxation and use of national health  
51  
52 promotion fund. Ministry of Health and Welfare, Kwachon; 2003 (Korean)  
53  
54  
55  
56  
57  
58  
59  
60

- 1  
2  
3  
4 25. Yoon YS, Oh SW, Park HS. Socioeconomic status in relation to obesity and abdominal  
5 obesity in Korean adults: a focus on sex differences. *Obesity* 2006;14(5):909-19.  
6  
7  
8  
9 26. Kim J, Sharma SV, Park SK. Association between socioeconomic status and obesity in  
10 adults: evidence from the 2001 to 2009 Korea National Health and Nutrition Examination  
11 Survey. *J Prev Med Public Health* 2014;47(2):94-103.  
12  
13  
14  
15  
16 27. Wardle J, Haase AM, Steptoe A. Body image and weight control in young adults:  
17 international comparisons in university students from 22 countries. *Int J Obes (Lond)*  
18 2006;30(4):644-51.  
19  
20  
21  
22  
23 28. Tang M, Chen Y, Krewski D. Gender-related differences in the association between  
24 socioeconomic status and self-reported diabetes. *Int J Epidemiol* 2003;32(3):381-5.  
25  
26  
27  
28  
29 29. Lee DS, Kim YJ, Han HR. Sex differences in the association between socio-economic  
30 status and type 2 diabetes: data from the 2005 Korean National Health and Nutritional  
31 Examination Survey (KNHANES). *Public Health* 2013;127(6):554-60.  
32  
33  
34  
35  
36 30. Kautzky-Willer A, Dorner T, Jensby A, *et al.* Women show a closer association between  
37 educational level and hypertension or diabetes mellitus than males: a secondary analysis from  
38 the Austrian HIS. *BMC Public Health* 2012;12:392.  
39  
40  
41  
42  
43 31. Espelt. A, Kunst AE, Palencia L, *et al.* Twenty years of socio-economic inequalities in  
44 type 2 diabetes mellitus prevalence in Spain, 1987-2006. *Eur J Public Health*  
45 2012;22(6):765-71.  
46  
47  
48  
49  
50 32. Imkampe AK, Gulliford MC. Increasing socio-economic inequality in type 2 diabetes  
51 prevalence-repeated cross-sectional surveys in England 1994-2006. *Eur J Public Health*  
52 2010;21(4):484-90.  
53  
54  
55  
56

- 1  
2  
3  
4 33. Barbeau EM, Krieger N, Soobader MJ. Working class matters: socioeconomic  
5  
6 disadvantage, race/ethnicity, gender, and smoking in NHIS 2000. *Am J Public Health*.  
7  
8 2004;94(2):269-78.  
9
- 10  
11 34. Park SH, Kim CH, Kim DJ, *et al*. Secular trends in prevalence of alcohol use disorder and  
12  
13 its correlates in Korean adults: results from Korean National Health and Nutrition  
14  
15 Examination Survey 2005 and 2009. *Subst Abus* 2012;33(4):327-35.  
16  
17
- 18 35. Korea Centers for Disease Control and Prevention, Korea Health Statistics 2012, Korea  
19  
20 National Health and Nutrition Examination Survey (KNHANESV-3), Seoul, Korea; Korea  
21  
22 Ministry of Health and Welfare; 2013.  
23  
24
- 25 36. Hong SA, Kim K, Kim MK. Educational attainment and differences in fruit and vegetable  
26  
27 consumption among middle-aged adults in the Korean National Health and Nutrition  
28  
29 Examination Survey IV. *Nutr Res Pract* 2012;6(3):263-9.  
30  
31
- 32 37. Baek TH, Lee HY, Lim NK, *et al*. Gender differences in the association between  
33  
34 socioeconomic status and hypertension incidence: the Korean Genome and Epidemiology  
35  
36 Study (KoGES). *BMC Public Health* 2015;15:852.  
37  
38
- 39 38. Kim MH, Kim MK, Choi BY, *et al*. Educational disparities in the metabolic syndrome in  
40  
41 a rapidly changing society-the case of South Korea. *Int J Epidemiol* 2005;34(6):1266-73.  
42  
43
- 44 39. KCDC, 2014. Korean National Health and Nutrition Examination Survey.  
45  
46 [http://knhanes.cdc.go.kr](Accessed 31/07/2016)  
47  
48  
49  
50  
51  
52  
53  
54  
55  
56  
57  
58  
59  
60

Supplementary Table 1. Trends in prevalence (SE) of major risk factors of CVD from 2001 to 2014

|                      | KNHANES    |             |              |              |               | P-value* |
|----------------------|------------|-------------|--------------|--------------|---------------|----------|
|                      | II<br>2001 | III<br>2005 | IV<br>2007-9 | V<br>2010-12 | VI<br>2013-14 |          |
| <b>Men</b>           |            |             |              |              |               |          |
| Smoking              | 65.3 (1.0) | 55.5 (1.2)  | 49.5 (0.8)   | 49.7 (0.8)   | 46.8 (1.1)    | <0.001   |
| Obesity              | 33.9 (1.2) | 37.8 (1.4)  | 39.6 (0.7)   | 38.7 (0.8)   | 41.4 (0.9)    | <0.001   |
| Diabetes             | 6.8 (0.6)  | 8.2 (0.6)   | 8.5 (0.4)    | 8.9 (0.5)    | 10.4 (0.6)    | <0.001   |
| Hypertension         | 25.4 (1.2) | 25.2 (1.2)  | 22.5 (0.7)   | 26.2 (0.7)   | 26.4 (0.9)    | 0.36     |
| Hypercholesterolemia | 8.4 (0.7)  | 7.1 (0.7)   | 9.4 (0.5)    | 11.8 (0.5)   | 12.8 (0.7)    | <0.001   |
| <b>Women</b>         |            |             |              |              |               |          |
| Smoking              | 3.7 (0.4)  | 5.3 (0.5)   | 6.1 (0.4)    | 6.9 (0.4)    | 5.6 (0.5)     | <0.001   |
| Obesity              | 28.8 (1.0) | 28.2 (1.2)  | 26.3 (0.6)   | 28.1 (0.7)   | 25.0 (0.8)    | 0.01     |
| Diabetes             | 5.4 (0.5)  | 4.9 (0.6)   | 5.4 (0.3)    | 5.5 (0.3)    | 5.7 (0.4)     | 0.43     |
| Hypertension         | 15.6 (0.9) | 15.0 (0.9)  | 14.6 (0.5)   | 16.4 (0.6)   | 15.3 (0.6)    | 0.72     |
| Hypercholesterolemia | 8.3 (0.6)  | 6.3 (0.6)   | 9.7 (0.4)    | 12.8 (0.5)   | 12.8 (0.6)    | <0.001   |

\*P for  $\chi^2$  linear trend test

Supplementary Table 2. Age-adjusted OR, 95% CI and RII of hypercholesterolemia by SES from 2005 to 2014

|                | KNHANES          |                  |                  |                  |
|----------------|------------------|------------------|------------------|------------------|
|                | III<br>2005      | IV<br>2007-9     | V<br>2010-12     | VI<br>2013-14    |
| <b>Men</b>     |                  |                  |                  |                  |
| Education(yr)  |                  |                  |                  |                  |
| ≥13            | 1                | 1                | 1                | 1                |
| 10-12          | 1.12 (0.68-1.82) | 1.06 (0.82-1.36) | 1.12 (0.88-1.43) | 1.08 (0.81-1.42) |
| 7-9            | 0.72 (0.29-1.79) | 1.16 (0.80-1.69) | 1.05 (0.77-1.44) | 0.91 (0.54-1.52) |
| ≤6             | 1.02 (0.55-1.91) | 0.83 (0.57-1.23) | 1.09 (0.74-1.60) | 0.92 (0.58-1.45) |
| RII (95% CI)   | 0.89 (0.42-1.87) | 1.00 (0.67-1.51) | 1.14 (0.79-1.65) | 0.93 (0.57-1.53) |
| P for trend    |                  | 0.906            |                  |                  |
| Income         |                  |                  |                  |                  |
| Q4             | 1                | 1                | 1                | 1                |
| Q3             | 0.54 (0.29-1.01) | 0.86 (0.63-1.17) | 0.64 (0.48-0.85) | 1.15 (0.81-1.64) |
| Q2             | 0.87 (0.46-1.66) | 0.88 (0.66-1.18) | 0.97 (0.74-1.28) | 0.81 (0.56-1.18) |
| Q1             | 0.98 (0.54-1.78) | 1.02 (0.77-1.35) | 0.93 (0.71-1.21) | 0.85 (0.59-1.23) |
| RII (95% CI)   | 1.14 (0.48-2.72) | 1.02 (0.71-1.48) | 1.08 (0.76-1.54) | 0.72 (0.45-1.14) |
| P for trend    |                  | 0.301            |                  |                  |
| <b>Women</b>   |                  |                  |                  |                  |
| Education (yr) |                  |                  |                  |                  |
| ≥13            | 1                | 1                | 1                | 1                |
| 10-12          | 0.95 (0.47-0.91) | 0.76 (0.56-1.02) | 1.31 (0.99-1.73) | 0.84 (0.62-1.15) |
| 7-9            | 0.66 (0.30-1.44) | 0.74 (0.52-1.05) | 1.12 (0.80-1.56) | 0.95 (0.63-1.43) |
| ≤6             | 0.69 (0.31-1.57) | 0.83 (0.58-1.19) | 1.19 (0.84-1.67) | 0.95 (0.63-1.43) |
| RII (95% CI)   | 0.64 (0.27-1.53) | 0.85 (0.58-1.24) | 1.08 (0.75-1.54) | 0.85 (0.55-1.33) |
| P for trend    |                  | 0.499            |                  |                  |
| Income         |                  |                  |                  |                  |
| Q4             | 1                | 1                | 1                | 1                |
| Q3             | 0.82 (0.47-1.44) | 0.88 (0.67-1.17) | 0.98 (0.77-1.24) | 0.79 (0.58-1.09) |
| Q2             | 0.65 (0.36-1.17) | 0.97 (0.73-1.28) | 0.93 (0.72-1.19) | 1.29 (0.95-1.75) |
| Q1             | 0.96 (0.59-1.54) | 1.08 (0.82-1.42) | 1.12 (0.88-1.42) | 1.02 (0.76-1.37) |
| RII (95% CI)   | 0.87 (0.44-1.70) | 1.13 (0.79-1.61) | 1.14 (0.84-1.54) | 1.24 (0.85-1.81) |
| P for trend    |                  | 0.397            |                  |                  |

STROBE 2007 (v4)Statement—Checklist of items that should be included in reports of cross-sectional studies

| Section/Topic             | Item # | Recommendation                                                                                                                                                                       | Reported on page # |
|---------------------------|--------|--------------------------------------------------------------------------------------------------------------------------------------------------------------------------------------|--------------------|
| Title and abstract        | 1      | (a) Indicate the study’s design with a commonly used term in the title or the abstract                                                                                               | 3                  |
|                           |        | (b) Provide in the abstract an informative and balanced summary of what was done and what was found                                                                                  | 3                  |
| <b>Introduction</b>       |        |                                                                                                                                                                                      |                    |
| Background/rationale      | 2      | Explain the scientific background and rationale for the investigation being reported                                                                                                 | 5                  |
| Objectives                | 3      | State specific objectives, including any prespecified hypotheses                                                                                                                     | 5                  |
| <b>Methods</b>            |        |                                                                                                                                                                                      |                    |
| Study design              | 4      | Present key elements of study design early in the paper                                                                                                                              | 6                  |
| Setting                   | 5      | Describe the setting, locations, and relevant dates, including periods of recruitment, exposure, follow-up, and data collection                                                      | 6                  |
| Participants              | 6      | (a) Give the eligibility criteria, and the sources and methods of selection of participants                                                                                          | 6                  |
| Variables                 | 7      | Clearly define all outcomes, exposures, predictors, potential confounders, and effect modifiers. Give diagnostic criteria, if applicable                                             | 6-8                |
| Data sources/ measurement | 8*     | For each variable of interest, give sources of data and details of methods of assessment (measurement). Describe comparability of assessment methods if there is more than one group | 6-8                |
| Bias                      | 9      | Describe any efforts to address potential sources of bias                                                                                                                            | 6-8                |
| Study size                | 10     | Explain how the study size was arrived at                                                                                                                                            |                    |
| Quantitative variables    | 11     | Explain how quantitative variables were handled in the analyses. If applicable, describe which groupings were chosen and why                                                         | 6-8                |
| Statistical methods       | 12     | (a) Describe all statistical methods, including those used to control for confounding                                                                                                | 9                  |
|                           |        | (b) Describe any methods used to examine subgroups and interactions                                                                                                                  |                    |
|                           |        | (c) Explain how missing data were addressed                                                                                                                                          |                    |
|                           |        | (d) If applicable, describe analytical methods taking account of sampling strategy                                                                                                   |                    |
|                           |        | (e) Describe any sensitivity analyses                                                                                                                                                |                    |
| <b>Results</b>            |        |                                                                                                                                                                                      |                    |

|                          |     |                                                                                                                                                                                                                                                                                                                                                                                                               |                |
|--------------------------|-----|---------------------------------------------------------------------------------------------------------------------------------------------------------------------------------------------------------------------------------------------------------------------------------------------------------------------------------------------------------------------------------------------------------------|----------------|
| Participants             | 13* | (a) Report numbers of individuals at each stage of study—eg numbers potentially eligible, examined for eligibility, confirmed eligible, included in the study, completing follow-up, and analysed<br>(b) Give reasons for non-participation at each stage<br>(c) Consider use of a flow diagram                                                                                                               | 6, 10,11       |
| Descriptive data         | 14* | (a) Give characteristics of study participants (eg demographic, clinical, social) and information on exposures and potential confounders<br>(b) Indicate number of participants with missing data for each variable of interest                                                                                                                                                                               | 10,11          |
| Outcome data             | 15* | Report numbers of outcome events or summary measures                                                                                                                                                                                                                                                                                                                                                          |                |
| Main results             | 16  | (a) Give unadjusted estimates and, if applicable, confounder-adjusted estimates and their precision (eg, 95% confidence interval). Make clear which confounders were adjusted for and why they were included<br>(b) Report category boundaries when continuous variables were categorized<br>(c) If relevant, consider translating estimates of relative risk into absolute risk for a meaningful time period | 10-17<br>10-17 |
| Other analyses           | 17  | Report other analyses done—eg analyses of subgroups and interactions, and sensitivity analyses                                                                                                                                                                                                                                                                                                                |                |
| <b>Discussion</b>        |     |                                                                                                                                                                                                                                                                                                                                                                                                               |                |
| Key results              | 18  | Summarise key results with reference to study objectives                                                                                                                                                                                                                                                                                                                                                      | 17             |
| Limitations              | 19  | Discuss limitations of the study, taking into account sources of potential bias or imprecision. Discuss both direction and magnitude of any potential bias                                                                                                                                                                                                                                                    | 20             |
| Interpretation           | 20  | Give a cautious overall interpretation of results considering objectives, limitations, multiplicity of analyses, results from similar studies, and other relevant evidence                                                                                                                                                                                                                                    | 20             |
| Generalisability         | 21  | Discuss the generalisability (external validity) of the study results                                                                                                                                                                                                                                                                                                                                         |                |
| <b>Other information</b> |     |                                                                                                                                                                                                                                                                                                                                                                                                               |                |
| Funding                  | 22  | Give the source of funding and the role of the funders for the present study and, if applicable, for the original study on which the present article is based                                                                                                                                                                                                                                                 | 21             |

\*Give information separately for cases and controls in case-control studies and, if applicable, for exposed and unexposed groups in cohort and cross-sectional studies.

**Note:** An Explanation and Elaboration article discusses each checklist item and gives methodological background and published examples of transparent reporting. The STROBE checklist is best used in conjunction with this article (freely available on the Web sites of PLoS Medicine at <http://www.plosmedicine.org/>, Annals of Internal Medicine at <http://www.annals.org/>, and Epidemiology at <http://www.epidem.com/>). Information on the STROBE Initiative is available at [www.strobe-statement.org](http://www.strobe-statement.org).

# BMJ Open

## Trends in socioeconomic inequalities in five major risk factors for cardiovascular disease in the Korean population (Korea National Health and Nutrition Examination Survey, 2001-2014): a cross-sectional study

|                                 |                                                                                                                                                                                                                                                                                                                                                                                                                                                                                                                                                                                                                                                                                                                                                                                                                                                                                                                     |
|---------------------------------|---------------------------------------------------------------------------------------------------------------------------------------------------------------------------------------------------------------------------------------------------------------------------------------------------------------------------------------------------------------------------------------------------------------------------------------------------------------------------------------------------------------------------------------------------------------------------------------------------------------------------------------------------------------------------------------------------------------------------------------------------------------------------------------------------------------------------------------------------------------------------------------------------------------------|
| Journal:                        | <i>BMJ Open</i>                                                                                                                                                                                                                                                                                                                                                                                                                                                                                                                                                                                                                                                                                                                                                                                                                                                                                                     |
| Manuscript ID                   | bmjopen-2016-014070.R1                                                                                                                                                                                                                                                                                                                                                                                                                                                                                                                                                                                                                                                                                                                                                                                                                                                                                              |
| Article Type:                   | Research                                                                                                                                                                                                                                                                                                                                                                                                                                                                                                                                                                                                                                                                                                                                                                                                                                                                                                            |
| Date Submitted by the Author:   | 07-Dec-2016                                                                                                                                                                                                                                                                                                                                                                                                                                                                                                                                                                                                                                                                                                                                                                                                                                                                                                         |
| Complete List of Authors:       | Kim, Yoon Jung; Hallym University Kangdong Sacred Heart Hospital, Department of Internal Medicine<br>Lee, Ji Sung; Asan Medical Center, University of Ulsan College of Medicine, Clinical Research Center<br>Park, Juri; Hallym University Kangdong Sacred Heart Hospital, Division of Endocrinology and Metabolism, Department of Internal Medicine<br>Choi, Dong Seop; Korea University College of Medicine, Department of Internal Medicine<br>Kim, Doo Man; Hallym University Kangdong Sacred Heart Hospital, Division of Endocrinology and Metabolism, Department of Internal Medicine<br>Lee, Kee-Hyoung ; Korea University College of Medicine, Pediatrics<br>Kim, Ho Yeon ; Inha University Hospital, Department of Obstetrics and Gynecology<br>Kim, Sin Gon; Korea University College of Medicine, Department of Internal Medicine<br>Lee, Juneyoung; Korea University College of Medicine, Biostatistics |
| <b>Primary Subject Heading</b>: | Epidemiology                                                                                                                                                                                                                                                                                                                                                                                                                                                                                                                                                                                                                                                                                                                                                                                                                                                                                                        |
| Secondary Subject Heading:      | Cardiovascular medicine, Health policy, Public health                                                                                                                                                                                                                                                                                                                                                                                                                                                                                                                                                                                                                                                                                                                                                                                                                                                               |
| Keywords:                       | Health inequality, cardiovascular disease, trend, cardiovascular disease risk factors                                                                                                                                                                                                                                                                                                                                                                                                                                                                                                                                                                                                                                                                                                                                                                                                                               |
|                                 |                                                                                                                                                                                                                                                                                                                                                                                                                                                                                                                                                                                                                                                                                                                                                                                                                                                                                                                     |

SCHOLARONE™  
Manuscripts



1  
2  
3  
4 **Trends in socioeconomic inequalities in five major risk factors for**  
5 **cardiovascular disease in the Korean population (Korea National Health**  
6 **and Nutrition Examination Survey, 2001-2014): a cross-sectional study**  
7  
8  
9  
10  
11  
12  
13  
14

15 Yoon Jung Kim<sup>1\*</sup>, Ji Sung Lee<sup>2\*</sup>, Juri Park<sup>1</sup>, Dong Seop Choi<sup>3</sup>, Doo Man Kim<sup>1</sup>, Kee-Hyoung  
16 Lee<sup>4</sup>, Ho Yeon Kim<sup>5</sup>, Sin Gon Kim<sup>3†</sup>, Juneyoung Lee<sup>6†</sup>  
17  
18  
19  
20  
21

22 YJK\* and JSL\* contributed equally to this study.  
23  
24

25 SGK<sup>†</sup> and JL<sup>†</sup> contributed equally to this study.  
26  
27  
28  
29

30 <sup>1</sup>Division of Endocrinology and Metabolism, Department of Internal Medicine, Hallym  
31 University Kangdong Sacred Heart Hospital, Seoul, Korea  
32  
33  
34

35 <sup>2</sup>Clinical Research Center, Asan Medical Center, University of Ulsan College of Medicine,  
36 Seoul, Korea  
37  
38  
39

40 <sup>3</sup>Division of Endocrinology and Metabolism, Department of Internal Medicine, Korea  
41 University College of Medicine, Seoul, Korea  
42  
43  
44

45 <sup>4</sup>Department of Pediatrics, Korea University College of Medicine, Seoul, Korea  
46  
47

48 <sup>5</sup>Department of Obstetrics and Gynecology, Inha University Hospital, Incheon, Korea  
49  
50

51 <sup>6</sup>Department of Biostatistics, Korea University College of Medicine, Seoul, Korea  
52  
53  
54  
55  
56  
57  
58  
59  
60

1  
2  
3  
4 **Correspondence to:** Juneyoung Lee, PhD

5  
6 Department of Biostatistics, Korea University College of Medicine, Anam-dong 5-ga,  
7  
8 Seongbuk-gu, Seoul 136-701, Korea

9  
10  
11 Tel: 82-2-920-6436; Fax: 82-2-953-6439; E-mail: jyleeuf@korea.ac.kr

12  
13  
14  
15  
16  
17  
18 Word count:  
19  
20  
21  
22  
23  
24  
25  
26  
27  
28  
29  
30  
31  
32  
33  
34  
35  
36  
37  
38  
39  
40  
41  
42  
43  
44  
45  
46  
47  
48  
49  
50  
51  
52  
53  
54  
55  
56  
57  
58  
59  
60

For peer review only

## ABSTRACT

**Objectives:** To examine trends in socioeconomic inequalities in major cardiovascular disease (CVD) risk factors among Korean population

**Design:** Cross-sectional study

**Setting:** A nationally representative population survey database

**Participants:** A total of 42,725 Koreans, aged 25-64 years, using data from the Korean National Health and Nutrition Examination Survey II (2001) to VI (2013-2014)

**Main outcome measures:** Trends in socioeconomic inequalities in five major CVD risk factors (smoking, obesity, diabetes, hypertension, hypercholesterolemia)

**Results** Gender differences were noted in the time trends in socioeconomic inequalities in smoking, obesity, diabetes and hypertension. Among men, low SES was associated with higher prevalence of smoking, but not with those of obesity, diabetes or hypertension. The magnitudes of socioeconomic inequalities in smoking, obesity and diabetes remained unchanged, and the magnitude of the inequality in hypertension decreased over time. However, among women low SES was associated with higher prevalence of smoking, obesity, diabetes and hypertension. Time trends towards increasing socioeconomic inequalities, measured by income, in smoking, obesity and diabetes were found in women. Unlike the other CVD risk factors, hypercholesterolemia was not associated with socioeconomic inequality.

**Conclusions** SES had a stronger impact on major CVD risk factors among Korean women than men. Moreover, socioeconomic inequalities in smoking, obesity and diabetes worsened

1  
2  
3  
4 among Korean women over time. Public policies to prevent smoking, obesity and diabetes in  
5  
6 women with lower SES are needed to address inequalities.  
7

8  
9 Keywords: trend, health inequality, cardiovascular disease, cardiovascular disease risk factors  
10

### 11 12 13 14 15 **Strengths and limitations of the study** 16

- 17  
18 - This study shows that socioeconomic inequalities in smoking, obesity and diabetes  
19  
20 have been worsened over past 14 years among Korean women.  
21
- 22  
23 - A strength of this study is that nationally representative sample was used as a study  
24  
25 population.  
26
- 27  
28 - The limitation of this study is that no more than fourteen years trend in  
29  
30 socioeconomic inequalities can be examined because the data of KNHANES I (1998)  
31  
32 was excluded due to its lack of reliability and there was no available nationally  
33  
34 representative data before 1998.  
35  
36  
37  
38  
39  
40  
41  
42  
43  
44  
45  
46  
47  
48  
49  
50  
51  
52  
53  
54  
55  
56  
57  
58  
59  
60

## INTRODUCTION

Socioeconomic status (SES) has shown inverse associations with cardiovascular disease (CVD) in most industrialised Western countries, such that disadvantaged groups experience higher risks for CVD.[1-2] A considerable portion of the association between SES and CVD has been attributed to the combined effects of inequalities in health-related behaviours, environmental conditions, social structures and contact with and delivery of healthcare services.[3] As CVD mortality and morbidity contribute sizeable proportions to overall health inequality, attempts to reduce these causes of death are public health concerns.[4] Previous studies have shown that a greater decline in the prevalence of CVD risk factors among higher SES groups widened the gap among SES groups over time in the US.[5-6] However, studies in England and Australia failed to provide strong evidence that socioeconomic inequalities in CVD risk factors had increased in recent decades.[7-8]

Korea, a recently developed country, has experienced rapid socioeconomic growth. The per capita gross national income has increased 2.5-fold over the past 14 years (from \$11,000 US in 2001 to \$27,000 US in 2014), but the gap in socioeconomic circumstances has widened during this period.[9-10] Thus, it remains unclear whether the increased overall wealth has improved health status of all segments of the population.

To our knowledge, no previous study has examined time trends in socioeconomic inequalities with regard to major CVD risk factors in Koreans. The purpose of this study was to examine recent national trends in socioeconomic inequalities in five major CVD risk factors (smoking, obesity, diabetes, hypertension, hypercholesterolemia) using national survey data by gender.

## METHODS

### Study participants

This study was based on data from five consecutive Korean National Health and Nutrition Examination Surveys (KNHANES) conducted from 2001 to 2014. A detailed description of the survey design and data collection in the KNHANES has been published before.[11] The KNHANES was initiated in 1998 and has been conducted as a series of surveys. We excluded the data from KNHANES I (1998) due to a lack of reliability.[12] Representative households of non-institutionalised Koreans residing in Korea were selected using a stratified and multi-stage clustered probability sampling method. The response rates in the target population ranged from 70.2% to 86.5%. In this study, the study population was limited to adults aged 25-64 years old to examine trends in socioeconomic inequalities. Considering the applicability of socioeconomic measures (such as education level and household income), we excluded survey participants aged younger than 25 who may not have completed their education or have no job and those older than 64 because they were mostly economically inactive. The total number of participants in the analysis was 42,725; 5,206 for the KNHANES II (2001), 4,286 for the KNHANES III (2005), 12,407 for the KNHANES IV (2007-2009), 12,977 for the KNHANES V (2010-2012), and 7,849 for the KNHANES VI (2013-2014) (Fig. 1). We composed the data set of 5 CVD risk factors individually excluding the data with missing values for each CVD risk factor.

### Health interview and health examination survey

The KNHANES consists of three components: a health interview, a health examination, and a

1  
2  
3  
4 nutrition survey. The health interview survey collects detailed information on SES (e.g.  
5 education level, household income), smoking and drinking behaviours, and healthcare  
6 utilisation. Prior diagnosis of diabetes and hypertension by a physician and current use of  
7 anti-hypertensive and anti-hyperglycaemic agents are included in the questionnaire. Height to  
8 the nearest 0.1 cm was measured using portable stadiometers. Weight to the nearest 0.1 kg  
9 was measured using a portable electronic scale. According to the standard protocol, systolic  
10 blood pressure (SBP) and diastolic blood pressure (DBP) were measured by trained nurses  
11 using a mercury sphygmomanometer (Baumanometer Desk model; Baum, NY, USA) on the  
12 right arm of the subject while sitting after at least 5 min of rest.  
13  
14  
15  
16  
17  
18  
19  
20  
21  
22  
23  
24  
25  
26

### 27 **Blood sample collection and biochemical analysis**

28  
29  
30 Venous blood samples were obtained from each participant in the morning after fasting for at  
31 least 8 h. All samples were processed according to the protocols of KNHANES. After blood  
32 collection, an 8-mL serum separating tube for analysing blood lipid level was kept at room  
33 temperature for 30 min, and the blood was subsequently centrifuged (3000 rpm, 15 min). A  
34 2-ml sodium fluoride tube for analysing glucose levels was mixed in a roller mixer for 10 min.  
35 All blood samples were refrigerated at 2-8°C and then transported to the central laboratory.  
36 Within 24 h of blood collection, plasma concentrations of glucose and lipid were assayed  
37 using an Advia 1650 (Siemens, NY, USA) in 2005 and 2007 and using a Hitachi Automatic  
38 Analyzer 7600 (Hitachi, Tokyo, Japan) since 2008. Since 2005, all laboratory analyses were  
39 performed according to the protocol and monitored to ensure the values met acceptable  
40 standards of precision and reproducibility in a central laboratory. Because quality control for  
41 the biochemical analysis of blood was started by the Korea Centers for Disease Control and  
42  
43  
44  
45  
46  
47  
48  
49  
50  
51  
52  
53  
54  
55  
56

1  
2  
3  
4 Prevention (KCDC) in 2005, we analysed the data on serum glucose and total cholesterol that  
5  
6 were collected since 2005 in this study.  
7  
8  
9

### 10 11 12 **Socioeconomic status (SES) indicators**

13  
14 Education level and income were used as SES indicators. Education level was grouped into  
15  
16 four categories by years completed: college or higher ( $\geq 13$  years), high school (10-12 years),  
17  
18 middle school (7-9 years), elementary school or less ( $\leq 6$  years). The measure of income was  
19  
20 equivalised gross household income per month, defined as total household income divided by  
21  
22 the square root of the number of household members to adjust for the effect of the number of  
23  
24 individuals in the household. We divided study subjects into four groups according to  
25  
26 quartiles of equivalised household income by gender and age (Q1-Q4; Q1, highest quartile;  
27  
28 Q4, lowest quartile).  
29  
30  
31  
32  
33  
34  
35

### 36 **Definition of CVD risk factors**

37  
38 As for CVD risk factors, smoking, hypertension, diabetes mellitus and hypercholesterolemia  
39  
40 were examined because these are major independent risk factors for cardiovascular  
41  
42 disease.[13] Obesity was also included due to its role of predisposing factor that could  
43  
44 enhance the impact of the four independent risk factors. Cigarette smoking was defined as a  
45  
46 “yes” answer to both of the following questions: “Have you smoked at least 100 cigarettes in  
47  
48 your entire life?” and “Do you smoke cigarettes now?” Body mass index (BMI) was  
49  
50 calculated as the ratio of weight to height squared ( $\text{kg/m}^2$ ). Obesity was defined as a BMI of  
51  
52  $\geq 25 \text{ kg/m}^2$ , according to the re-defined criteria of the World Health Organization for obesity  
53  
54  
55  
56  
57  
58  
59  
60



1  
2  
3  
4 in the Asia-Pacific region.[14] Based on the criteria of the World Health Organization,  
5  
6 diabetes was defined as fasting plasma glucose of  $\geq 126$  mg/dL, a previous diagnosis of  
7  
8 diabetes by a physician, or current use of anti-hyperglycaemic agents or insulin.[15]  
9  
10 According to the criteria of the 7<sup>th</sup> Report of the Joint National Committee, hypertension was  
11  
12 defined as an average SBP and/or DBP  $\geq 140/90$  mmHg or the use of anti-hypertensive  
13  
14 agents.[16] According to the guidelines for cholesterol of the NCEP ATP III,  
15  
16 hypercholesterolemia was defined as a plasma total cholesterol of  $\geq 240$  mg/dL or current use  
17  
18 of cholesterol-lowering agents.[17]  
19  
20  
21  
22  
23  
24

### 25 **Statistical analysis**

26  
27  
28 The demographic characteristics of the study participants are presented as the means  $\pm$  SE or  
29  
30 age-adjusted prevalence (SE). Comparisons of the characteristics across survey periods were  
31  
32 performed using analysis of variance (ANOVA) or  $\chi^2$  test, as appropriate, and  $\chi^2$  linear trend  
33  
34 test was also used. To adjust differences of results from change in age structure of each  
35  
36 survey, age-adjusted prevalence was calculated using direct standardization method based on  
37  
38 2010 Korea Census. The relative index of inequality (RII), a measure of effect that permits  
39  
40 meaningful comparisons of socioeconomic health inequalities over survey periods was  
41  
42 computed. The RII enables direct comparisons between SES variables with regard to the  
43  
44 proportions of the population in different categories. To obtain the RII for each indicator of  
45  
46 SES, a score between 0 (for the highest SES) and 1 (for the lowest SES) was assigned to each  
47  
48 category based on the proportion of subjects above the midpoint in the category. For example,  
49  
50 if 10% of the subjects were in the highest educational category, participants in the group were  
51  
52 represented by the range 0–0.1 and given a score of 0.05 (half of 0.1). If 20% of the  
53  
54  
55  
56  
57  
58  
59  
60

1  
2  
3  
4 population were in the next group, participants in the group were given a score of 0.20 (0.1  
5 plus 0.2/2). The RII was obtained by regressing the outcome on each of the SES scores and  
6  
7 was directly interpretable for each SES indicator used to compare participants with lowest  
8  
9 SES (1) with those with the highest SES (0). In this study, the RII of major CVD risk factors  
10  
11 is presented using the odds ratio and 95% confidence interval computed from binary logistic  
12  
13 regression analysis adjusted for age. Trends in the RII were examined by estimating the P  
14  
15 value for an interaction term of SES indicator and the variables that identified the year of the  
16  
17 data in the model. Survey year was entered into the model as a numerical value (e.g., 2001  
18  
19 for KNHANES II). As data from KNHANES were derived from stratified and multi-stage  
20  
21 clustered probability sampling method to represent the entire South Korean population,  
22  
23 population weightings were applied in the analyses. The PROC SURVEY procedure was  
24  
25 used to apply stratification, primary sampling units and population weights. Significance  
26  
27 levels were set at a two-tailed p-value <0.05. All analyses were conducted using the SAS  
28  
29 software version 9.4 (SAS Institute, Cary, NC).  
30  
31  
32  
33  
34  
35  
36  
37  
38

## 39 RESULTS

40  
41  
42 The general characteristics of participants in the KNHANES II (2001) to VI (2013-2014) are  
43  
44 shown in Table 1. The mean age of participants increased over time ( $41.2 \pm 0.2$  to  $43.8 \pm 0.2$   
45  
46 years and  $41.6 \pm 0.2$  to  $44.2 \pm 0.2$  years for men and women, respectively). The proportion of  
47  
48 participants with college or higher education ( $\geq 13$  years) increased gradually, from 39% to 47%  
49  
50 for men and from 24% to 39% for women from 2001 to 2014. There were significant  
51  
52 interaction effects between gender and SES (education and income levels) on RII except for  
53  
54 hypercholesterolemia. Specifically, p-values for gender by education interactions were for  
55  
56  
57  
58  
59  
60

Table 1 General characteristics of the study population (25-64 years) from 2001 to 2014

|                               | KNHANES*    |             |              |              |               | P-value† |
|-------------------------------|-------------|-------------|--------------|--------------|---------------|----------|
|                               | II<br>2001  | III<br>2005 | IV<br>2007-9 | V<br>2010-12 | VI<br>2013-14 |          |
| <b>Men</b>                    |             |             |              |              |               |          |
| n                             | 3164        | 2868        | 5318         | 5501         | 3315          |          |
| Age                           | 41.2±0.2    | 41.1±0.3    | 42.4±0.2     | 43.1±0.2     | 43.8±0.2      | <0.001   |
| BMI                           | 23.9±0.1    | 24.2±0.1    | 24.3±0.1     | 24.3±0.1     | 24.6±0.1      | <0.001   |
| Education (yr)                |             |             |              |              |               | <0.001   |
| ≤6                            | 9.4 (0.8)   | 8.3 (0.6)   | 9.6 (0.5)    | 8.3 (0.5)    | 7.2 (0.6)     |          |
| 7-9                           | 12.1 (0.7)  | 10.0 (0.7)  | 10.5 (0.5)   | 10.1 (0.5)   | 8.8 (0.6)     |          |
| 10-12                         | 39.8 (1.2)  | 42.4 (1.2)  | 39.4 (0.9)   | 38.6 (0.8)   | 36.9 (1.1)    |          |
| ≥13                           | 38.7 (1.6)  | 39.2 (1.4)  | 40.5 (1.0)   | 43.0 (0.9)   | 47.1 (1.2)    |          |
| Income‡                       |             |             |              |              |               | 0.234    |
| Q1(highest)                   | 22.3 (1.3)  | 26.7 (1.2)  | 24.8 (0.8)   | 26.5 (0.8)   | 25.0 (1.0)    |          |
| Q2                            | 24.0 (1.0)  | 25.2 (1.0)  | 24.2 (0.7)   | 25.6 (0.8)   | 26.0 (0.9)    |          |
| Q3                            | 26.6 (1.0)  | 23.1 (0.9)  | 25.4 (0.7)   | 24.5 (0.7)   | 24.7 (0.9)    |          |
| Q4(lowest)                    | 27.0 (1.4)  | 25.0 (1.3)  | 25.7 (1.0)   | 23.5 (0.8)   | 24.2 (1.2)    |          |
| <b>Prevalence<sup>§</sup></b> |             |             |              |              |               |          |
| Smoking                       | 64.0 (0.02) | 54.8 (0.02) | 49.0 (0.02)  | 49.7 (0.02)  | 47.1 (0.02)   | 0.03     |
| Obesity                       | 33.9 (0.02) | 38.4 (0.02) | 39.7 (0.02)  | 38.8 (0.02)  | 41.4 (0.02)   | 0.038    |
| Diabetes                      | 7.3 (0.01)  | 9.2 (0.01)  | 8.9 (0.01)   | 8.8 (0.01)   | 9.9 (0.01)    | 0.076    |
| Hypertension                  | 27.9 (0.02) | 26.8 (0.01) | 23.3 (0.01)  | 26.0 (0.01)  | 25.6 (0.01)   | 0.404    |
| Hypercholesterolemia          | 8.6 (0.01)  | 7.4 (0.01)  | 9.5 (0.01)   | 11.7 (0.01)  | 12.6 (0.01)   | 0.062    |
| <b>Women</b>                  |             |             |              |              |               |          |
| n                             | 3509        | 3276        | 7048         | 7410         | 4497          |          |
| Age                           | 41.6±0.3    | 41.6±0.3    | 42.7±0.2     | 43.5±0.2     | 44.2±0.2      | <0.001   |
| BMI                           | 23.4±0.1    | 23.4±0.1    | 23.2±0.1     | 23.3±0.1     | 23.1±0.1      | 0.018    |
| Education                     |             |             |              |              |               | <0.001   |
| ≤6                            | 19.2 (1.1)  | 17.3 (0.9)  | 17.2 (0.6)   | 15.5 (0.6)   | 12.5 (0.7)    |          |
| 7-9                           | 14.6 (0.7)  | 13.2 (0.7)  | 12.3 (0.5)   | 11.6 (0.5)   | 10.2 (0.5)    |          |
| 10-12                         | 42.2 (1.1)  | 42.0 (1.3)  | 40.6 (0.7)   | 38.9 (0.8)   | 38.3 (0.9)    |          |
| ≥13                           | 24.1 (1.4)  | 27.6 (1.5)  | 29.9 (0.9)   | 34.0 (0.9)   | 39.1 (1.1)    |          |
| Income‡                       |             |             |              |              |               | 0.133    |
| Q1(highest)                   | 23.1 (1.3)  | 25.9 (1.1)  | 24.3 (0.8)   | 27.6 (0.8)   | 24.7 (0.9)    |          |
| Q2                            | 24.0 (0.9)  | 25.7 (1.0)  | 25.3 (0.7)   | 25.8 (0.7)   | 25.0 (0.9)    |          |
| Q3                            | 26.1 (0.9)  | 24.2 (0.9)  | 25.2 (0.7)   | 24.4 (0.7)   | 25.1 (0.9)    |          |
| Q4(lowest)                    | 26.9 (1.5)  | 24.2 (1.3)  | 25.2 (0.9)   | 22.3 (0.7)   | 25.2 (1.2)    |          |
| <b>Prevalence<sup>§</sup></b> |             |             |              |              |               |          |
| Smoking                       | 3.7 (0.01)  | 5.4 (0.01)  | 6.0 (0.01)   | 6.9 (0.01)   | 5.8 (0.01)    | 0.125    |
| Obesity                       | 30.8 (0.02) | 29.7 (0.02) | 26.8 (0.01)  | 28.0 (0.01)  | 24.4 (0.01)   | 0.036    |
| Diabetes                      | 5.9 (0.01)  | 5.3 (0.01)  | 5.7 (0.01)   | 5.4 (0.01)   | 5.4 (0.01)    | 0.177    |
| Hypertension                  | 17.7 (0.01) | 16.9 (0.01) | 15.3 (0.01)  | 16.1 (0.01)  | 14.2 (0.01)   | 0.034    |
| Hypercholesterolemia          | 8.8 (0.01)  | 7.0 (0.01)  | 10.1 (0.01)  | 12.5 (0.01)  | 11.9 (0.01)   | <0.001   |

Values given are n, prevalence (SE) or mean ± SE

\*KNHANES (Korean National Health and Nutrition Examination Survey)

†P-value by ANOVA or  $\chi^2$  test

‡Quartiles based on equivalised household income

§Age-adjusted prevalence

For peer review only

1  
2  
3  
4 hypercholesterolemia. Specifically, p-values for gender by education interactions were <.001,  
5  
6 <.001, .0002, <.0001 and .7679 for smoking, obesity, diabetes, hypertension and  
7  
8 hypercholesterolemia, respectively. For gender by income interactions, they were <.001,  
9  
10 <.001, .0326, .0484 and .3019, respectively. Therefore, we examined trends in socioeconomic  
11  
12 inequalities in those major CVD risk factors by gender.  
13

### 14 15 16 17 18 19 **Smoking**

20  
21 Over the past 14 years, age-adjusted smoking rate decreased significantly, from 64% to 47%  
22  
23 in men, but it did not change in women (Table 1). Low SES was associated with a high  
24  
25 prevalence of smoking in both genders (Table 2). Among Korean men, time trends in  
26  
27 socioeconomic inequalities in smoking by education and income levels were generally stable  
28  
29 during 2001-2014. In contrast, a significantly increasing trend in socioeconomic inequalities  
30  
31 during 2001-2014. In contrast, a significantly increasing trend in socioeconomic inequalities  
32  
33 with regard to smoking was noted among women (Table 2).  
34  
35  
36  
37  
38

### 39 **Obesity**

40  
41 We found significant increased trends in the mean BMI (23.9 kg/m<sup>2</sup> in 2001 and 24.6 kg/m<sup>2</sup>  
42  
43 in 2014, p <0.001) and the age-adjusted prevalence of obesity (34% for 2001 and 41% for  
44  
45 2014, p=0.038) over time in men (Table 1). In contrast, women showed decreasing trends in  
46  
47 mean BMI and the age-adjusted prevalence of obesity (23.4 kg/m<sup>2</sup> in 2001 and 23.1 kg/m<sup>2</sup> in  
48  
49 2014, p=0.018, 31% in 2001 and 24% in 2014, p=0.036; Table 1). Time trends in  
50  
51 socioeconomic inequalities in obesity were stable among men; however, a time trend toward  
52  
53 increasing inequality in obesity by income was noted in women (1.72, 1.19-2.48 in 2001;  
54  
55  
56  
57  
58  
59  
60

Table 2 Age-adjusted odds ratios (OR) and 95% confidence interval (CI) and relative indices of inequalities (RII) in smoking by SES from 2001 to 2014

|                | KNHANES          |                  |                  |                  |                   |
|----------------|------------------|------------------|------------------|------------------|-------------------|
|                | II<br>2001       | III<br>2005      | IV<br>2007-9     | V<br>2010-12     | VI<br>2013-14     |
| <b>Men</b>     |                  |                  |                  |                  |                   |
| Education (yr) |                  |                  |                  |                  |                   |
| ≥13            | 1                | 1                | 1                | 1                | 1                 |
| 10-12          | 1.75 (1.45-2.12) | 1.86 (1.53-2.25) | 1.57 (1.37-1.81) | 1.47 (1.27-1.71) | 1.48 (1.23-1.78)  |
| 7-9            | 1.48 (1.14-1.93) | 1.57 (1.13-2.18) | 2.16 (1.72-2.71) | 1.62 (1.27-2.05) | 1.25 (0.92-1.72)  |
| ≤6             | 2.41 (1.72-3.37) | 2.22 (1.62-3.05) | 1.95 (1.53-2.48) | 1.71 (1.32-2.22) | 1.77 (1.26-2.49)  |
| RII (95% CI)   | 2.73 (1.97-3.79) | 2.75 (2.00-3.79) | 2.74 (2.16-3.48) | 2.16 (1.69-2.77) | 2.17 (1.57-3.00)  |
| P for trend    | 0.193            |                  |                  |                  |                   |
| Income         |                  |                  |                  |                  |                   |
| Q1(highest)    | 1                | 1                | 1                | 1                | 1                 |
| Q2             | 1.23 (0.97-1.55) | 1.34 (1.05-1.72) | 1.31 (1.11-1.56) | 1.09 (0.91-1.30) | 1.26 (1.00-1.59)  |
| Q3             | 1.49 (1.17-1.91) | 1.50 (1.21-1.86) | 1.56 (1.32-1.85) | 1.23 (1.01-1.49) | 1.34 (1.07-1.66)  |
| Q4(lowest)     | 1.74 (1.35-2.24) | 1.87 (1.46-2.40) | 1.79 (1.51-2.12) | 1.50 (1.24-1.81) | 1.43 (1.15-1.79)  |
| RII (95% CI)   | 2.10 (1.53-2.89) | 2.22 (1.63-3.02) | 2.16 (1.74-2.68) | 1.71 (1.34-2.18) | 1.57 (1.19-2.08)  |
| P for trend    | 0.087            |                  |                  |                  |                   |
| <b>Women</b>   |                  |                  |                  |                  |                   |
| Education (yr) |                  |                  |                  |                  |                   |
| ≥13            | 1                | 1                | 1                | 1                | 1                 |
| 10-12          | 1.25 (0.75-2.09) | 3.69 (2.07-6.57) | 3.95 (2.78-5.62) | 2.80 (1.97-4.00) | 4.08 (2.67-6.22)  |
| 7-9            | 1.55 (0.76-3.15) | 4.04 (1.95-8.34) | 6.47 (3.90-10.7) | 6.15 (3.65-10.4) | 7.75 (4.12-14.6)  |
| ≤6             | 1.98 (1.00-3.90) | 4.12 (1.92-8.86) | 7.59 (4.42-13.0) | 5.52 (3.06-9.9)  | 9.53 (4.88-18.6)  |
| RII (95% CI)   | 1.75 (0.87-3.52) | 3.41 (1.78-6.55) | 8.27 (5.05-13.6) | 6.81 (3.86-12.0) | 10.29 (5.23-20.2) |
| P for trend    | <0.001           |                  |                  |                  |                   |
| Income         |                  |                  |                  |                  |                   |
| Q1(highest)    | 1                | 1                | 1                | 1                | 1                 |
| Q2             | 0.53 (0.29-0.95) | 1.05 (0.58-1.91) | 0.95 (0.64-1.42) | 0.98 (0.66-1.46) | 1.54 (0.82-2.89)  |
| Q3             | 0.67 (0.39-1.13) | 1.50 (0.90-2.51) | 1.46 (1.02-2.09) | 1.48 (0.99-2.23) | 2.28 (1.29-4.00)  |
| Q4(lowest)     | 1.53 (0.95-2.47) | 2.74 (1.68-4.46) | 2.23 (1.57-3.17) | 2.53 (1.75-3.65) | 3.95 (2.34-6.66)  |
| RII (95% CI)   | 1.92 (0.88-4.21) | 4.45 (2.26-8.76) | 3.36 (2.10-5.39) | 4.11 (2.46-6.88) | 6.27 (3.22-12.20) |
| P for trend    | 0.043            |                  |                  |                  |                   |

1  
2  
3  
4 2.69, 2.02-3.59 in 2014,  $p=0.03$ , RII, 95% CI, respectively; Table 3).  
5  
6  
7

### 9 **Diabetes**

10  
11  
12 The age-adjusted prevalence of diabetes did not change significantly over time in either  
13 gender (Table 1). Although no significant time trend in socioeconomic inequality in diabetes  
14 was seen in men, significantly increasing inequality in diabetes was noticed in women,  
15 especially by income (0.76, 0.36-1.58 in 2001; 2.56, 1.55-4.22 in 2014, RII, 95% CI,  $p=0.01$ ,  
16  
17 respectively; Table 4).  
18  
19  
20  
21  
22  
23  
24  
25  
26

### 27 **Hypertension**

28  
29  
30 The age-adjusted prevalence of hypertension did not change significantly over time among  
31 men (Table 1). However, the age-adjusted prevalence of hypertension was decreased over  
32 time among women. There were also gender differences in the time trend with regard to  
33 socioeconomic inequalities in hypertension (Table 5). In men, socioeconomic difference was  
34 decreased with income over the past 14 years (1.64, 1.09-2.49 in 2001; 0.99, 0.71-1.39 in  
35 2014, RII, 95% CI,  $p=0.04$ ), whereas inequalities were increased with marginal significance  
36 among women in the same period (1.48, 0.89-2.46 in 2001; 2.91, 1.98-4.29 in 2014, RII, 95%  
37 CI,  $p=0.06$ , by education; 1.22, 0.73-2.04 in 2001; 2.32, 1.63-3.30 in 2014, RII, 95% CI,  
38  
39  $p=0.056$ , by income, respectively; Table 5).  
40  
41  
42  
43  
44  
45  
46  
47  
48  
49  
50  
51  
52

### 53 **Hypercholesterolemia**

Table 3 Age-adjusted OR, 95% CI and RII in obesity by SES from 2001 to 2014

|                | KNHANES          |                  |                  |                  |                  |
|----------------|------------------|------------------|------------------|------------------|------------------|
|                | II<br>2001       | III<br>2005      | IV<br>2007-9     | V<br>2010-12     | VI<br>2013-14    |
| <b>Men</b>     |                  |                  |                  |                  |                  |
| Education (yr) |                  |                  |                  |                  |                  |
| ≥13            | 1                | 1                | 1                | 1                | 1                |
| 10-12          | 0.96 (0.78-1.20) | 0.86 (0.66-1.12) | 0.91 (0.79-1.04) | 0.89 (0.76-1.04) | 1.03 (0.86-1.23) |
| 7-9            | 0.90 (0.64-1.26) | 0.90 (0.57-1.44) | 0.80 (0.65-1.00) | 0.88 (0.67-1.14) | 0.94 (0.68-1.30) |
| ≤6             | 0.83 (0.55-1.23) | 0.43 (0.27-0.67) | 0.74 (0.58-0.93) | 0.64 (0.48-0.84) | 0.80 (0.57-1.11) |
| RII (95% CI)   | 0.95 (0.66-1.38) | 0.63 (0.40-0.98) | 0.74 (0.58-0.94) | 0.79 (0.60-1.03) | 0.98 (0.72-1.34) |
| P for trend    | 0.673            |                  |                  |                  |                  |
| Income         |                  |                  |                  |                  |                  |
| Q1(highest)    | 1                | 1                | 1                | 1                | 1                |
| Q2             | 1.15 (0.88-1.51) | 0.89 (0.63-1.26) | 1.02 (0.86-1.21) | 0.89 (0.73-1.08) | 0.90 (0.73-1.10) |
| Q3             | 0.92 (0.70-1.20) | 0.71 (0.52-0.97) | 1.02 (0.84-1.23) | 0.97 (0.81-1.17) | 1.15 (0.91-1.44) |
| Q4(lowest)     | 1.11 (0.83-1.47) | 0.76 (0.55-1.06) | 0.96 (0.80-1.15) | 0.74 (0.61-0.90) | 0.85 (0.69-1.05) |
| RII (95% CI)   | 1.02 (0.71-1.45) | 0.66 (0.43-1.02) | 0.95 (0.75-1.20) | 0.72 (0.57-0.92) | 0.91 (0.70-1.20) |
| P for trend    | 0.778            |                  |                  |                  |                  |
| <b>Women</b>   |                  |                  |                  |                  |                  |
| Education (yr) |                  |                  |                  |                  |                  |
| ≥13            | 1                | 1                | 1                | 1                | 1                |
| 10-12          | 2.64 (1.93-3.60) | 1.99 (1.43-2.77) | 1.74 (1.46-2.08) | 1.90 (1.59-2.28) | 1.76 (1.43-2.18) |
| 7-9            | 5.53 (3.83-7.98) | 2.84 (1.86-4.34) | 2.49 (1.98-3.12) | 2.45 (1.92-3.12) | 2.92 (2.16-3.96) |
| ≤6             | 3.79 (2.52-5.72) | 3.42 (2.28-5.15) | 3.55 (2.81-4.50) | 2.65 (2.09-3.37) | 3.99 (2.92-5.45) |
| RII (95% CI)   | 3.19 (2.23-4.57) | 3.45 (2.17-5.47) | 3.57 (2.83-4.51) | 2.93 (2.29-3.73) | 4.01 (2.94-5.49) |
| P for trend    | 0.617            |                  |                  |                  |                  |
| Income         |                  |                  |                  |                  |                  |
| Q1(highest)    | 1                | 1                | 1                | 1                | 1                |
| Q2             | 1.17 (0.90-1.51) | 1.50 (1.06-2.11) | 1.05 (0.87-1.26) | 1.32 (1.07-1.63) | 1.65 (1.29-2.10) |
| Q3             | 1.30 (0.97-1.73) | 1.43 (1.03-1.98) | 1.48 (1.24-1.77) | 1.51 (1.25-1.83) | 1.97 (1.58-2.47) |
| Q4(lowest)     | 1.53 (1.15-2.03) | 1.63 (1.16-2.29) | 1.61 (1.34-1.93) | 1.88 (1.54-2.29) | 2.21 (1.74-2.81) |
| RII (95% CI)   | 1.72 (1.19-2.48) | 1.73 (1.15-2.61) | 2.03 (1.61-2.56) | 2.21 (1.73-2.83) | 2.69 (2.02-3.59) |
| P for trend    | 0.032            |                  |                  |                  |                  |



Table 4 Age-adjusted OR, 95% CI and RII in diabetes by SES from 2005 to 2014

|                | KNHAENS          |                  |                  |                  |
|----------------|------------------|------------------|------------------|------------------|
|                | III<br>2005      | IV<br>2007-9     | V<br>2010-12     | VI<br>2013-14    |
| <b>Men</b>     |                  |                  |                  |                  |
| Education (yr) |                  |                  |                  |                  |
| ≥13            | 1                | 1                | 1                | 1                |
| 10-12          | 1.21 (0.72-2.03) | 0.98 (0.74-1.28) | 1.39 (1.05-1.85) | 1.14 (0.82-1.57) |
| 7-9            | 1.20 (0.64-2.25) | 1.05 (0.73-1.52) | 1.41 (0.96-2.06) | 1.13 (0.71-1.81) |
| ≤6             | 1.42 (0.77-2.59) | 0.92 (0.64-1.32) | 1.30 (0.88-1.90) | 1.06 (0.65-1.73) |
| RII (95% CI)   | 1.41 (0.72-2.77) | 0.91 (0.59-1.40) | 1.38 (0.91-2.09) | 1.09 (0.64-1.85) |
| P for trend    |                  | 0.838            |                  |                  |
| Income         |                  |                  |                  |                  |
| Q1(highest)    | 1                | 1                | 1                | 1                |
| Q2             | 0.53 (0.30-0.93) | 1.12 (0.81-1.56) | 0.76 (0.54-1.07) | 0.86 (0.58-1.30) |
| Q3             | 0.84 (0.49-1.43) | 0.96 (0.69-1.32) | 0.90 (0.64-1.27) | 1.06 (0.73-1.55) |
| Q4(lowest)     | 0.93 (0.57-1.53) | 1.48 (1.09-2.01) | 1.06 (0.77-1.46) | 1.34 (0.92-1.95) |
| RII (95% CI)   | 1.08 (0.53-2.18) | 1.53 (1.02-2.30) | 1.17 (0.76-1.79) | 1.55 (0.95-2.56) |
| P for trend    |                  | 0.557            |                  |                  |
| <b>Women</b>   |                  |                  |                  |                  |
| Education (yr) |                  |                  |                  |                  |
| ≥13            | 1                | 1                | 1                | 1                |
| 10-12          | 2.69 (1.11-6.53) | 2.04 (1.28-3.23) | 2.10 (1.30-3.40) | 1.38 (0.89-2.12) |
| 7-9            | 3.30 (1.00-10.9) | 1.76 (1.02-3.05) | 2.23 (1.26-3.96) | 1.76 (1.02-3.02) |
| ≤6             | 4.33 (1.42-13.3) | 3.29 (1.93-5.59) | 2.85 (1.62-5.02) | 1.68 (0.99-2.87) |
| RII (95% CI)   | 3.69 (0.99-13.8) | 3.33 (1.99-5.57) | 2.61 (1.57-4.35) | 1.92 (1.14-3.23) |
| P for trend    |                  | 0.254            |                  |                  |
| Income         |                  |                  |                  |                  |
| Q1(highest)    | 1                | 1                | 1                | 1                |
| Q2             | 0.86 (0.46-1.59) | 1.06 (0.70-1.59) | 1.84 (1.21-2.79) | 1.13 (0.72-1.78) |
| Q3             | 1.10 (0.62-1.98) | 1.75 (1.23-2.50) | 2.36 (1.55-3.57) | 1.23 (0.79-1.91) |
| Q4(lowest)     | 0.71 (0.39-1.31) | 1.99 (1.39-2.87) | 2.56 (1.72-3.82) | 2.04 (1.38-3.01) |
| RII (95% CI)   | 0.76 (0.36-1.58) | 2.80 (1.77-4.42) | 2.90 (1.89-4.47) | 2.56 (1.55-4.22) |
| P for trend    |                  | 0.015            |                  |                  |

Table 5 Age-adjusted OR, 95% CI and RII of hypertension by SES from 2001 to 2014

|                | KNHANES          |                  |                  |                  |                  |
|----------------|------------------|------------------|------------------|------------------|------------------|
|                | II<br>2001       | III<br>2005      | IV<br>2007-9     | V<br>2010-12     | VI<br>2013-14    |
| <b>Men</b>     |                  |                  |                  |                  |                  |
| Education (yr) |                  |                  |                  |                  |                  |
| ≥13            | 1                | 1                | 1                | 1                | 1                |
| 10-12          | 1.43 (1.08-1.89) | 1.03 (0.75-1.40) | 1.03 (0.86-1.25) | 1.15 (0.97-1.38) | 0.97 (0.78-1.22) |
| 7-9            | 1.22 (0.84-1.78) | 1.50 (0.96-2.36) | 0.98 (0.77-1.24) | 1.12 (0.87-1.44) | 0.93 (0.69-1.24) |
| ≤6             | 1.17 (0.77-1.79) | 1.31 (0.85-2.02) | 1.08 (0.84-1.40) | 1.15 (0.89-1.49) | 1.01 (0.70-1.47) |
| RII (95% CI)   | 1.34 (0.88-2.03) | 1.41 (0.90-2.20) | 1.08 (0.82-1.42) | 1.16 (0.88-1.52) | 0.93 (0.66-1.32) |
| P for trend    | 0.133            |                  |                  |                  |                  |
| Income         |                  |                  |                  |                  |                  |
| Q1(highest)    | 1                | 1                | 1                | 1                | 1                |
| Q2             | 1.21 (0.86-1.69) | 0.87 (0.59-1.29) | 1.09 (0.88-1.35) | 1.13 (0.91-1.42) | 1.28 (0.95-1.71) |
| Q3             | 1.10 (0.76-1.59) | 0.95 (0.70-1.29) | 1.11 (0.89-1.39) | 1.11 (0.89-1.37) | 1.09 (0.83-1.43) |
| Q4(lowest)     | 1.58 (1.14-2.19) | 1.23 (0.90-1.69) | 1.23 (0.99-1.54) | 1.11 (0.89-1.38) | 1.05 (0.80-1.39) |
| RII (95% CI)   | 1.64 (1.09-2.49) | 1.37 (0.91-2.06) | 1.30 (0.99-1.71) | 1.11 (0.85-1.46) | 0.99 (0.71-1.39) |
| P for trend    | 0.042            |                  |                  |                  |                  |
| <b>Women</b>   |                  |                  |                  |                  |                  |
| Education (yr) |                  |                  |                  |                  |                  |
| ≥13            | 1                | 1                | 1                | 1                | 1                |
| 10-12          | 1.55 (0.93-2.61) | 1.91 (1.14-3.18) | 2.21 (1.62-3.02) | 1.69 (1.32-2.17) | 1.80 (1.30-2.47) |
| 7-9            | 2.64 (1.47-4.76) | 2.90 (1.60-5.25) | 2.50 (1.76-3.55) | 2.15 (1.58-2.92) | 2.59 (1.78-3.77) |
| ≤6             | 1.79 (0.99-3.24) | 3.18 (1.68-5.99) | 2.69 (1.91-3.80) | 2.45 (1.83-3.30) | 3.06 (2.10-4.46) |
| RII (95% CI)   | 1.48 (0.89-2.46) | 2.11 (1.21-3.69) | 1.93 (1.38-2.70) | 2.15 (1.56-2.97) | 2.91 (1.98-4.29) |
| P for trend    | 0.060            |                  |                  |                  |                  |
| Income         |                  |                  |                  |                  |                  |
| Q1(highest)    | 1                | 1                | 1                | 1                | 1                |
| Q2             | 1.48 (1.06-2.07) | 1.37 (0.92-2.05) | 0.99 (0.80-1.23) | 1.04 (0.82-1.33) | 1.44 (1.04-1.98) |
| Q3             | 1.15 (0.78-1.69) | 1.33 (0.92-1.93) | 1.25 (1.00-1.55) | 1.29 (1.01-1.65) | 2.33 (1.74-3.13) |
| Q4(lowest)     | 1.29 (0.85-1.94) | 1.50 (0.99-2.28) | 1.39 (1.11-1.76) | 1.41 (1.11-1.78) | 1.73 (1.28-2.36) |
| RII (95% CI)   | 1.22 (0.73-2.04) | 1.62 (0.97-2.71) | 1.63 (1.20-2.22) | 1.65 (1.23-2.21) | 2.32 (1.63-3.30) |
| P for trend    | 0.056            |                  |                  |                  |                  |

1  
2  
3  
4 The age-adjusted prevalence of hypercholesterolemia among men increased with marginal  
5 statistical significance. The age-adjusted prevalence of hypercholesterolemia among women  
6 increased over time (Table 1). There was no significant association between  
7  
8  
9  
10  
11  
12 SES and hypercholesterolemia in either gender (Table 6).

## 13 14 **DISCUSSION**

15  
16  
17 The result of this study reflected gender differences not only in the relationships between  
18  
19  
20 major CVD risk factors and SES, but also in the linear time trends in socioeconomic  
21  
22 inequalities in major CVD risk factors among Koreans. Among men, no major CVD risk  
23  
24 factor except smoking showed significant associations with SES. Indeed, socioeconomic  
25  
26 inequalities in major CVD risk factors were stable over time and inequality in hypertension  
27  
28 decreased over the past 14 years. However, women with a lower SES had higher risks of  
29  
30 smoking, obesity, diabetes and hypertension than did those with a higher SES. Increasing  
31  
32 trends in socioeconomic inequalities in smoking, obesity and diabetes, especially measured  
33  
34 major CVD risk factors and SES, but also in the linear time trends in socioeconomic  
35  
36 inequalities in major CVD risk factors among Koreans. Among men, no major CVD risk  
37  
38 factor except smoking showed significant associations with SES. Indeed, socioeconomic  
39  
40 inequalities in major CVD risk factors were stable over time and inequality in hypertension  
41  
42 decreased over the past 14 years. However, women with a lower SES had higher risks of  
43  
44 smoking, obesity, diabetes and hypertension than did those with a higher SES. Increasing  
45  
46 trends in socioeconomic inequalities in smoking, obesity and diabetes, especially measured  
47  
48 by income, were noted in Korean women. In contrast to the other CVD risk factors,  
49  
50 hypercholesterolemia was not associated with socioeconomic inequalities in either gender.  
51  
52 Socioeconomic inequalities in CVD risk factors and disease-related mortality are well known  
53  
54  
55  
56  
57  
58  
59  
60

Table 6 Age-adjusted OR, 95% CI and RII of hypercholesterolemia by SES from 2005 to 2014

|                | KNHANES          |                  |                  |                  |
|----------------|------------------|------------------|------------------|------------------|
|                | III<br>2005      | IV<br>2007-9     | V<br>2010-12     | VI<br>2013-14    |
| <b>Men</b>     |                  |                  |                  |                  |
| Education(yr)  |                  |                  |                  |                  |
| ≥13            | 1                | 1                | 1                | 1                |
| 10-12          | 1.12 (0.68-1.82) | 1.06 (0.82-1.36) | 1.12 (0.88-1.43) | 1.08 (0.81-1.42) |
| 7-9            | 0.72 (0.29-1.79) | 1.16 (0.80-1.69) | 1.05 (0.77-1.44) | 0.91 (0.54-1.52) |
| ≤6             | 1.02 (0.55-1.91) | 0.83 (0.57-1.23) | 1.09 (0.74-1.60) | 0.92 (0.58-1.45) |
| RII (95% CI)   | 0.89 (0.42-1.87) | 1.00 (0.67-1.51) | 1.14 (0.79-1.65) | 0.93 (0.57-1.53) |
| P for trend    |                  | 0.906            |                  |                  |
| Income         |                  |                  |                  |                  |
| Q1 (highest)   | 1                | 1                | 1                | 1                |
| Q2             | 0.54 (0.29-1.01) | 0.86 (0.63-1.17) | 0.64 (0.48-0.85) | 1.15 (0.81-1.64) |
| Q3             | 0.87 (0.46-1.66) | 0.88 (0.66-1.18) | 0.97 (0.74-1.28) | 0.81 (0.56-1.18) |
| Q4 (lowest)    | 0.98 (0.54-1.78) | 1.02 (0.77-1.35) | 0.93 (0.71-1.21) | 0.85 (0.59-1.23) |
| RII (95% CI)   | 1.14 (0.48-2.72) | 1.02 (0.71-1.48) | 1.08 (0.76-1.54) | 0.72 (0.45-1.14) |
| P for trend    |                  | 0.301            |                  |                  |
| <b>Women</b>   |                  |                  |                  |                  |
| Education (yr) |                  |                  |                  |                  |
| ≥13            | 1                | 1                | 1                | 1                |
| 10-12          | 0.95 (0.47-0.91) | 0.76 (0.56-1.02) | 1.31 (0.99-1.73) | 0.84 (0.62-1.15) |
| 7-9            | 0.66 (0.30-1.44) | 0.74 (0.52-1.05) | 1.12 (0.80-1.56) | 0.95 (0.63-1.43) |
| ≤6             | 0.69 (0.31-1.57) | 0.83 (0.58-1.19) | 1.19 (0.84-1.67) | 0.95 (0.63-1.43) |
| RII (95% CI)   | 0.64 (0.27-1.53) | 0.85 (0.58-1.24) | 1.08 (0.75-1.54) | 0.85 (0.55-1.33) |
| P for trend    |                  | 0.499            |                  |                  |
| Income         |                  |                  |                  |                  |
| Q1 (highest)   | 1                | 1                | 1                | 1                |
| Q2             | 0.82 (0.47-1.44) | 0.88 (0.67-1.17) | 0.98 (0.77-1.24) | 0.79 (0.58-1.09) |
| Q3             | 0.65 (0.36-1.17) | 0.97 (0.73-1.28) | 0.93 (0.72-1.19) | 1.29 (0.95-1.75) |
| Q4 (lowest)    | 0.96 (0.59-1.54) | 1.08 (0.82-1.42) | 1.12 (0.88-1.42) | 1.02 (0.76-1.37) |
| RII (95% CI)   | 0.87 (0.44-1.70) | 1.13 (0.79-1.61) | 1.14 (0.84-1.54) | 1.24 (0.85-1.81) |
| P for trend    |                  | 0.397            |                  |                  |

1  
2  
3  
4 in Western industrialised countries and are now being found in many developing countries as  
5 well.[1-2, 18-19] However, there has been relatively little research examining time trends in  
6 socioeconomic inequalities in these CVD risk factors.[6-8] To our knowledge, this is the first  
7 report on trends in socioeconomic inequalities in major CVD risk factors in an Asian nation.  
8  
9

10  
11  
12  
13 In this study, distinct gender differences in time trend in smoking rates were found between  
14 Korean men and women, which is consistent with trends in other Asian countries, such as  
15 China and Taiwan.[20-21] Over the past 14 years, the smoking rate in men decreased, but  
16 that among women did not change significantly. Consistent with previous reports, our study  
17 showed that Koreans with a lower SES had higher smoking rates than those with a higher  
18 SES in both genders.[22-23] However, our study further showed gender differences in the  
19 time trend of smoking inequality. Based on the RII trend, the trend in inequality was stable  
20 among men, but the socioeconomic gap among women widened. There has been significant  
21 progress with anti-smoking policies in Korea in recent years. In 1995, the Health Promotion  
22 Act was enacted and restricted smoking in public buildings and places. In 2004, a significant  
23 increase in taxation of tobacco products began.[24] We suspect that these policies may have  
24 been effective among men in all socioeconomic groups, but they were ineffective for women  
25 with lower SES.  
26  
27  
28  
29  
30  
31  
32  
33  
34  
35  
36  
37  
38  
39  
40  
41  
42

43 Over the past 14 years, the prevalence of obesity has increased in men, but it has decreased in  
44 women. Among men, SES was not associated with the prevalence of obesity; however, lower  
45 SES was associated with a higher prevalence of obesity in women, reflecting gender  
46 differences in attitudes towards body image in Korea.[25] Men and women could have  
47 different attitudes toward body weight status and may use different methods for controlling  
48 body weight. As societies develop, women tend to acquire a more negative attitude toward  
49  
50  
51  
52  
53  
54  
55  
56  
57  
58  
59  
60

1  
2  
3  
4 obesity than do men. Additionally, public attitudes are more strongly negative towards obese  
5 women than towards obese men. Thus, women are more likely to use their resources to  
6 pursue a thinner body than are men, and women tend to shift their diet and activity patterns to  
7 a healthier lifestyle more rapidly than do men.[26-27]  
8  
9

10  
11  
12  
13 The prevalence of diabetes did not change in either gender during the study period. Our study  
14 found gender differences in association between SES and the prevalence of diabetes, which is  
15 consistent with previous studies that reported the influence of SES on the risk of diabetes was  
16 more pronounced in women than in men.[19, 28-30] To our knowledge, there is no previous  
17 study investigating time trends in socioeconomic inequalities in diabetes in Koreans. The  
18 inequality in diabetes in women, measured by income, increased during the past 14 years,  
19 which is consistent with previous studies in other countries.[31-32] Although the reasons for  
20 this gender-related difference remain unclear, several plausible explanations that relate low  
21 SES to an increased risk of diabetes in women can be proposed. Socioeconomic inequalities  
22 may cause differing lifestyle behaviours, such as alcohol intake and physical activity. Women  
23 with a lower SES have higher risk of harmful alcohol consumption, smoking and lack of  
24 physical activity.[3, 33-34] It may also be related to less social support and poorer access to  
25 healthcare services, leading to lower level of the detection and treatment of diabetes and  
26 associated risk factors.[35] Finally, women with a lower SES may have poor eating habits,  
27 such as less intake of fruits and vegetables.[36]  
28  
29  
30  
31  
32  
33  
34  
35  
36  
37  
38  
39  
40  
41  
42  
43  
44  
45  
46

47 During the study period, the prevalence of hypertension did not change among men, but  
48 decreased among women. The pattern of associations between SES and risk of hypertension  
49 differed by gender, which is consistent with a previous study.[37] The influence of low SES  
50 on hypertension was more prominent and socioeconomic inequalities widened with marginal  
51  
52  
53  
54  
55

1  
2  
3  
4 statistical significance in women during study period. In contrast, the socioeconomic  
5  
6 inequality in men was decreased, although the reason for alleviating inequality was not clear.  
7  
8 One possible explanation is that the marginally significant diminished inequality with respect  
9  
10 to smoking in men during the study period may have mitigated the inequality.  
11

12  
13 Trends in socioeconomic inequalities in obesity and diabetes among women increased by  
14  
15 income level, but they were not significant when measured by education. Rapid social change  
16  
17 has affected the meaning of education level; for example, the proportion of women who had  
18  
19 an education level of college or above was 24% in KNHANES II (2001). However, it was  
20  
21 ~40% in KNHANES VI (2013-2014). Thus, caution is needed in comparing education groups  
22  
23 across time, especially in rapidly changing societies. Additionally, it may be better to divide  
24  
25 education level into equal division to investigate health inequalities.[26, 38]  
26  
27

28  
29 Investigating the trends of RIIs were commonly used method for relative measures, but some  
30  
31 cases, absolute and relative measures may diverge with respect to magnitude or direction of  
32  
33 change in health inequalities.[39] Therefore we also examined the slope index of inequalities  
34  
35 (SII) as absolute measures of inequalities for five major CVD risk factors, and found no  
36  
37 difference in trends between relative and absolute inequalities (Supplementary table 1-5).  
38  
39

40  
41 Two strengths of our study is that study subjects were a nationally representative sample and  
42  
43 that time trends of the relationship between SES and five CVD major risk factors were  
44  
45 examined using two SES measures (education level, household income). However, several  
46  
47 limitations also be noted. First, the study was cross-sectional in nature; thus, it was difficult to  
48  
49 determine causal relationships between SES and CVD risk factors. Second, the KNHANES is  
50  
51 a self-report survey and therefore prone to measurement error and recall bias as well as  
52  
53 heterogeneity in self-reported health. Third, the steady decline in response rates in the  
54  
55

1  
2  
3  
4 KNHANES should not be overlooked, which could result in underestimating inequalities.[40]  
5  
6 Finally, we could not examine longer-term trends in socioeconomic inequalities in CVD risk  
7  
8 factors before 2001, because, following the authors' judgement, the KNHANES I (1998)  
9  
10 survey data were excluded due to lack of reliability.  
11  
12

## 13 14 15 16 **CONCLUSIONS** 17

18  
19 This study found that relationships between SES and major CVD risk factors (smoking,  
20  
21 obesity, diabetes, hypertension) were more prominent in Korean women than men. Health  
22  
23 inequalities, especially measured by income, in smoking, obesity and diabetes increased  
24  
25 among Korean women over the past 14 years. Public policies should be implemented to  
26  
27 prevent those risk factors for CVD among Korean women with a lower SES.  
28  
29

30  
31  
32  
33  
34 **Contributors** YJK, SGK, JL and JSL developed the research questions and contributed to  
35  
36 the development of the conceptual framework, and the interpretations of the results. YJK  
37  
38 contributed to writing and submitting the manuscript. JSL performed the main analyses and  
39  
40 critical revisions to the manuscript. JP provided theoretical support and DSC, DMK, KL and  
41  
42 HYK assisted with writing the manuscript.  
43  
44

45  
46 **Funding** No funding  
47

48  
49 **Competing interests** None declared.  
50

51  
52 **Ethical approval** All procedures and protocols of the study were approved by the  
53  
54 institutional review board of Korea Centers for Disease Control and Prevention (KCDC)  
55  
56



1  
2  
3  
4 since 2007. Written informed consent regarding the survey and blood analysis has been  
5  
6 obtained from all participants since 2001.  
7  
8

9 **Provenance and peer review** Not commissioned; externally peer reviewed.  
10

11 **Data sharing statement** No additional data are available.  
12  
13  
14  
15  
16  
17  
18  
19  
20  
21  
22  
23  
24  
25  
26  
27  
28  
29  
30  
31  
32  
33  
34  
35  
36  
37  
38  
39  
40  
41  
42  
43  
44  
45  
46  
47  
48  
49  
50  
51  
52  
53  
54  
55  
56  
57  
58  
59  
60

For peer review only

## REFERENCES

1. Strand BH, Tverdal A. Can cardiovascular risk factors and lifestyle explain the educational inequalities in mortality from ischaemic heart disease and from other heart diseases? 26-year follow-up of 50,000 Norwegian men and women. *J Epidemiol Community Health* 2004;58:705-9.
2. Mackenbach JP, Cavelaars AE, Kunst AE, *et al.* Socioeconomic inequalities in cardiovascular disease mortality; an international study. *Eur Heart J* 2000;21(14):1141-51.
3. Khang YH, Lynch JW, Jung-Choi K, *et al.* Explaining age-specific inequalities in mortality from all causes, cardiovascular disease and ischaemic heart disease among South Korean male public servants: relative and absolute perspectives. *Heart* 2008;94(1):75-82.
4. Mackenbach JP, Stirbu I, Roskam AJ, *et al.* Socioeconomic inequalities in health in 22 European countries. *N Engl J Med* 2008;358(23):2468-81.
5. Cooper R, Cutler J, Desvigne-Nickens P, *et al.* Trends and disparities in coronary heart disease, stroke, and other cardiovascular diseases in the United States. Findings of the National Conference on Cardiovascular Disease Prevention. *Circulation* 2000;102:3137-47.
6. Kanjilal S, Gregg EW, Cheng YJ, *et al.* Socioeconomic status and trends in disparities in 4 major risk factors for cardiovascular disease among US adults, 1971-2002. *Arch Intern Med* 2006;166(21):2348-55.
7. Bartley M, Fitzpatrick R, Firth D, *et al.* Social distribution of cardiovascular disease risk factors: changes among men in England 1984-1993. *J Epidemiol Community Health* 2000;54(11):806-14.

- 1  
2  
3  
4 8. Bennett S. Cardiovascular risk factors in Australia: trends in socioeconomic inequalities. *J*  
5  
6 *Epidemiol Community Health* 1995;49(4):363-72.  
7  
8
- 9 9. National Statistical Office of Korea.  
10  
11 [http://kosis.kr/statHtml/statHtml.do?orgId=101&tblId=DT\_2AS017&vw\_cd=MT\_RTITLE  
12  
13 &list\_id=R\_SUB\_OTITLE\_OTIT\_WBTIT\_4004&seqNo=&lang\_mode=ko&language=kor  
14  
15 &obj\_var\_id=&itm\_id=&conn\_path=E1](Accessed 31/07/2016)  
16  
17
- 18 10. Kang SW, Shin YS, Lee TJ, *et al.* A study on social polarization in Korea. Korea Institute  
19  
20 for Health and Social Affairs; [2007](#) (Korean).  
21  
22
- 23 11. Kweon S, Kim Y, Jang MJ, *et al.* Data resource profile: the Korea National Health and  
24  
25 Nutrition Examination Survey (KNHANES). *Int J Epidemiol* 2014;43:69-77.  
26  
27
- 28 12. Kim HJ, Kim Y, Cho Y, *et al.* Trends in the prevalence of major cardiovascular disease  
29  
30 risk factors among Korean adults: results from the Korean National Health and Nutrition  
31  
32 Examination Survey, 1998-2012. *Int J Cardiol* 2014;174(1):64-72.  
33  
34
- 35 13. Grundy SM, Pasternak R, Greenland P, *et al.* Assessment of cardiovascular risk by use of  
36  
37 multiple-risk-factor assessment equations: a statement for healthcare professionals from the  
38  
39 American Heart Association and the American College of Cardiology. *Circulation*  
40  
41 1999;100(13):1481-92.  
42  
43  
44
- 45 14. Steering Committee of the Western Pacific Region of the World Health Organization.  
46  
47 The International Association for the Study of Obesity and the International Obesity Task  
48  
49 Force. The Asia-Pacific perspective: redefining obesity and its treatment. Melbourne: Health  
50  
51 Communications Australia Pty Ltd.; 2000:8-55.  
52  
53  
54
- 55 15. World Health Organization. Definition, diagnosis and classification of diabetes mellitus  
56  
57

1  
2  
3  
4 and its complication. Geneva: World Health Organization; 2001.  
5  
6

7 16. U.S. Department of Health and Human Services. The seventh report of the joint National  
8  
9 Committee on Prevention, Detection, Evaluation, and Treatment of High Blood Pressure  
10  
11 (JNC-7). Bethesda, MD: National Institutes of Health; 2004.  
12  
13

14 17. National Institutes of Health. Third report of the National Cholesterol Education Program  
15  
16 (NCEP) Expert Panel on Detection, evaluation, and Treatment of High Blood Cholesterol in  
17  
18 Adults (Adult Treatment Panel III). Bethesda, MD: National Institutes of Health; 2002.  
19  
20

21 18. Fateh M, Emamian MH, *et al.* Socioeconomic inequality in hypertension in Iran. *J*  
22  
23 *Hypertens* 2014;32(9):1782-8.  
24  
25

26 19. Kim YJ, Jeon JY, Han SJ, *et al.* Effect of socio-economic status on the prevalence of  
27  
28 diabetes. *Yonsei Med J* 2015;56(3):641-7.  
29  
30

31 20. Yang G, Fan L, Tan J, *et al.* Smoking in China: findings of the 1996 National prevalence  
32  
33 survey. *JAMA* 1999;282(13):1247-53.  
34  
35

36 21. Wen CP, Levy DT, Cheng TY, *et al.* Smoking behavior in Taiwan, 2001. *Tob Control*  
37  
38 2005;14 Suppl 1:i51-5.  
39  
40

41 22. Khang YH, Cho HJ. Socioeconomic inequality in cigarette smoking: trends by gender,  
42  
43 age, and socioeconomic position in South Korea, 1989-2003. *Prev Med* 2006;42(6):415-22.  
44  
45

46 23. Cho HJ, Song YM, Smith GD, *et al.* Trends in socio-economic differentials in cigarette  
47  
48 smoking behavior between 1990 and 1998: a large prospective study in Korean men. *Public*  
49  
50 *Health* 2004;118:553-8.  
51  
52

53  
54 24. Kim YI, Kang KH, Lee KS, *et al.* Increase in cigarette taxation and use of national health  
55  
56

- 1  
2  
3  
4 promotion fund. Ministry of Health and Welfare, Kwachon; 2003 (Korean)
- 5  
6  
7 25. Yoon YS, Oh SW, Park HS. Socioeconomic status in relation to obesity and abdominal  
8  
9 obesity in Korean adults: a focus on sex differences. *Obesity* 2006;14(5):909-19.
- 10  
11  
12 26. Wardle J, Griffith J. Socioeconomic status and weight control practices in British adults. *J*  
13  
14 *Epidemiol Community Health* 2001;55:185-90.
- 15  
16  
17 27. Zhang Q, Wang Y. Socioeconomic inequality of obesity in the United States: do gender,  
18  
19 age, and ethnicity matter? *Soc Sci Med* 2004;58:1171-80.
- 20  
21  
22 28. Tang M, Chen Y, Krewski D. Gender-related differences in the association between  
23  
24 socioeconomic status and self-reported diabetes. *Int J Epidemiol* 2003;32(3):381-5.
- 25  
26  
27 29. Lee DS, Kim YJ, Han HR. Sex differences in the association between socio-economic  
28  
29 status and type 2 diabetes: data from the 2005 Korean National Health and Nutritional  
30  
31 Examination Survey (KNHANES). *Public Health* 2013;127(6):554-60.
- 32  
33  
34 30. Kautzky-Willer A, Dorner T, Jensby A, *et al.* Women show a closer association between  
35  
36 educational level and hypertension or diabetes mellitus than males: a secondary analysis from  
37  
38 the Austrian HIS. *BMC Public Health* 2012;12:392.
- 39  
40  
41 31. Espelt. A, Kunst AE, Palencia L, *et al.* Twenty years of socio-economic inequalities in  
42  
43 type 2 diabetes mellitus prevalence in Spain, 1987-2006. *Eur J Public Health*  
44  
45 2012;22(6):765-71.
- 46  
47  
48 32. Imkampe AK, Gulliford MC. Increasing socio-economic inequality in type 2 diabetes  
49  
50 prevalence-repeated cross-sectional surveys in England 1994-2006. *Eur J Public Health*  
51  
52 2010;21(4):484-90.
- 53  
54  
55  
56  
57  
58  
59  
60

- 1  
2  
3  
4 33. Barbeau EM, Krieger N, Soobader MJ. Working class matters: socioeconomic  
5  
6 disadvantage, race/ethnicity, gender, and smoking in NHIS 2000. *Am J Public Health*.  
7  
8 2004;94(2):269-78.  
9
- 10  
11 34. Park SH, Kim CH, Kim DJ, *et al*. Secular trends in prevalence of alcohol use disorder and  
12  
13 its correlates in Korean adults: results from Korean National Health and Nutrition  
14  
15 Examination Survey 2005 and 2009. *Subst Abus* 2012;33(4):327-35.  
16  
17
- 18 35. Korea Centers for Disease Control and Prevention, Korea Health Statistics 2012, Korea  
19  
20 National Health and Nutrition Examination Survey (KNHANESV-3), Seoul, Korea; Korea  
21  
22 Ministry of Health and Welfare; 2013.  
23  
24
- 25 36. Hong SA, Kim K, Kim MK. Educational attainment and differences in fruit and vegetable  
26  
27 consumption among middle-aged adults in the Korean National Health and Nutrition  
28  
29 Examination Survey IV. *Nutr Res Pract* 2012;6(3):263-9.  
30  
31
- 32 37. Baek TH, Lee HY, Lim NK, *et al*. Gender differences in the association between  
33  
34 socioeconomic status and hypertension incidence: the Korean Genome and Epidemiology  
35  
36 Study (KoGES). *BMC Public Health* 2015;15:852.  
37  
38
- 39 38. Kim MH, Kim MK, Choi BY, *et al*. Educational disparities in the metabolic syndrome in  
40  
41 a rapidly changing society-the case of South Korea. *Int J Epidemiol* 2005;34(6):1266-73.  
42  
43  
44
- 45 39. King NB, Harper S, Young ME. Use of relative and absolute effect measures in reporting  
46  
47 health inequalities: structured review. *BMJ* 2012;345:e5774.  
48  
49
- 50 40. Kim Y. The Korea National Health and Nutrition Examination Survey (KNHANES):  
51  
52 current status and challenges. *Epidemiol Health* 2014;36:e2014002.  
53  
54  
55  
56  
57  
58  
59  
60

1  
2  
3  
4  
5  
6  
7  
8  
9  
10  
11  
12  
13  
14  
15  
16  
17  
18  
19  
20  
21  
22  
23  
24  
25  
26  
27  
28  
29  
30  
31  
32  
33  
34  
35  
36  
37  
38  
39  
40  
41  
42  
43  
44  
45  
46  
47  
48  
49  
50  
51  
52  
53  
54  
55  
56  
57  
58  
59  
60

**Figure legends**

Fig 1. Study enrollment

Enrolled study population from the Korean National Health and Nutrition Examination survey (KNHANES) 2001-2014

For peer review only

1  
2  
3  
4  
5  
6  
7  
8  
9  
10  
11  
12  
13  
14  
15  
16  
17  
18  
19  
20  
21  
22  
23  
24  
25  
26  
27  
28  
29  
30  
31  
32  
33  
34  
35  
36  
37  
38  
39  
40  
41  
42  
43  
44  
45  
46  
47  
48  
49  
50  
51  
52  
53  
54  
55  
56  
57  
58  
59  
60

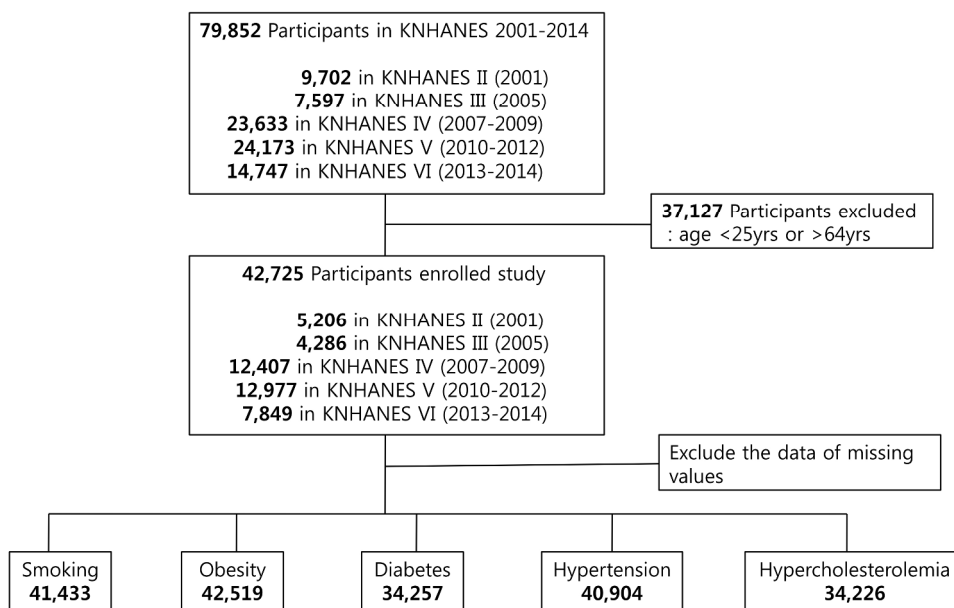

Figure 1

Fig 1. Study enrollment; † † Enrolled study population from the Korean National Health and Nutrition Examination survey (KNHANES) 2001-2014  
The total number of participant  
254x190mm (300 x 300 DPI)



STROBE 2007 (v4)Statement—Checklist of items that should be included in reports of cross-sectional studies

| Section/Topic             | Item # | Recommendation                                                                                                                                                                       | Reported on page # |
|---------------------------|--------|--------------------------------------------------------------------------------------------------------------------------------------------------------------------------------------|--------------------|
| Title and abstract        | 1      | (a) Indicate the study’s design with a commonly used term in the title or the abstract                                                                                               | 3                  |
|                           |        | (b) Provide in the abstract an informative and balanced summary of what was done and what was found                                                                                  | 3                  |
| <b>Introduction</b>       |        |                                                                                                                                                                                      |                    |
| Background/rationale      | 2      | Explain the scientific background and rationale for the investigation being reported                                                                                                 | 5                  |
| Objectives                | 3      | State specific objectives, including any prespecified hypotheses                                                                                                                     | 5                  |
| <b>Methods</b>            |        |                                                                                                                                                                                      |                    |
| Study design              | 4      | Present key elements of study design early in the paper                                                                                                                              | 6                  |
| Setting                   | 5      | Describe the setting, locations, and relevant dates, including periods of recruitment, exposure, follow-up, and data collection                                                      | 6                  |
| Participants              | 6      | (a) Give the eligibility criteria, and the sources and methods of selection of participants                                                                                          | 6                  |
| Variables                 | 7      | Clearly define all outcomes, exposures, predictors, potential confounders, and effect modifiers. Give diagnostic criteria, if applicable                                             | 6-8                |
| Data sources/ measurement | 8*     | For each variable of interest, give sources of data and details of methods of assessment (measurement). Describe comparability of assessment methods if there is more than one group | 6-8                |
| Bias                      | 9      | Describe any efforts to address potential sources of bias                                                                                                                            | 6-8                |
| Study size                | 10     | Explain how the study size was arrived at                                                                                                                                            |                    |
| Quantitative variables    | 11     | Explain how quantitative variables were handled in the analyses. If applicable, describe which groupings were chosen and why                                                         | 6-8                |
| Statistical methods       | 12     | (a) Describe all statistical methods, including those used to control for confounding                                                                                                | 9                  |
|                           |        | (b) Describe any methods used to examine subgroups and interactions                                                                                                                  |                    |
|                           |        | (c) Explain how missing data were addressed                                                                                                                                          |                    |
|                           |        | (d) If applicable, describe analytical methods taking account of sampling strategy                                                                                                   |                    |
|                           |        | (e) Describe any sensitivity analyses                                                                                                                                                |                    |
| <b>Results</b>            |        |                                                                                                                                                                                      |                    |

|                          |     |                                                                                                                                                                                                                                                                                                                                                                                                               |                |
|--------------------------|-----|---------------------------------------------------------------------------------------------------------------------------------------------------------------------------------------------------------------------------------------------------------------------------------------------------------------------------------------------------------------------------------------------------------------|----------------|
| Participants             | 13* | (a) Report numbers of individuals at each stage of study—eg numbers potentially eligible, examined for eligibility, confirmed eligible, included in the study, completing follow-up, and analysed<br>(b) Give reasons for non-participation at each stage<br>(c) Consider use of a flow diagram                                                                                                               | 6, 10,11       |
| Descriptive data         | 14* | (a) Give characteristics of study participants (eg demographic, clinical, social) and information on exposures and potential confounders<br>(b) Indicate number of participants with missing data for each variable of interest                                                                                                                                                                               | 10,11          |
| Outcome data             | 15* | Report numbers of outcome events or summary measures                                                                                                                                                                                                                                                                                                                                                          |                |
| Main results             | 16  | (a) Give unadjusted estimates and, if applicable, confounder-adjusted estimates and their precision (eg, 95% confidence interval). Make clear which confounders were adjusted for and why they were included<br>(b) Report category boundaries when continuous variables were categorized<br>(c) If relevant, consider translating estimates of relative risk into absolute risk for a meaningful time period | 10-17<br>10-17 |
| Other analyses           | 17  | Report other analyses done—eg analyses of subgroups and interactions, and sensitivity analyses                                                                                                                                                                                                                                                                                                                |                |
| <b>Discussion</b>        |     |                                                                                                                                                                                                                                                                                                                                                                                                               |                |
| Key results              | 18  | Summarise key results with reference to study objectives                                                                                                                                                                                                                                                                                                                                                      | 17             |
| Limitations              | 19  | Discuss limitations of the study, taking into account sources of potential bias or imprecision. Discuss both direction and magnitude of any potential bias                                                                                                                                                                                                                                                    | 20             |
| Interpretation           | 20  | Give a cautious overall interpretation of results considering objectives, limitations, multiplicity of analyses, results from similar studies, and other relevant evidence                                                                                                                                                                                                                                    | 20             |
| Generalisability         | 21  | Discuss the generalisability (external validity) of the study results                                                                                                                                                                                                                                                                                                                                         |                |
| <b>Other information</b> |     |                                                                                                                                                                                                                                                                                                                                                                                                               |                |
| Funding                  | 22  | Give the source of funding and the role of the funders for the present study and, if applicable, for the original study on which the present article is based                                                                                                                                                                                                                                                 | 21             |

\*Give information separately for cases and controls in case-control studies and, if applicable, for exposed and unexposed groups in cohort and cross-sectional studies.

**Note:** An Explanation and Elaboration article discusses each checklist item and gives methodological background and published examples of transparent reporting. The STROBE checklist is best used in conjunction with this article (freely available on the Web sites of PLoS Medicine at <http://www.plosmedicine.org/>, Annals of Internal Medicine at <http://www.annals.org/>, and Epidemiology at <http://www.epidem.com/>). Information on the STROBE Initiative is available at [www.strobe-statement.org](http://www.strobe-statement.org).

Supplementary table 1. Age-adjusted prevalence (95% CI) and slope index of inequalities (SII) of smoking by SES from 2001 to 2014

|                        | KNHAENS II (2001)  | KNHANES III (2005) | KNHANES IV (2007-2009) | KNHANES V (2010-2012) | KNHANES VI (2013-2014) |
|------------------------|--------------------|--------------------|------------------------|-----------------------|------------------------|
| <b>Men</b>             |                    |                    |                        |                       |                        |
| Education(yr) ≥13      | 56.65(56.58-56.73) | 46.60(46.53-46.67) | 41.99(41.94-42.05)     | 42.64(42.58-42.69)    | 41.90(41.85-41.95)     |
| 10-12                  | 68.60(68.52-68.68) | 59.23(59.17-59.29) | 51.71(51.65-51.77)     | 53.57(53.50-53.63)    | 52.58(52.51-52.64)     |
| 7-9                    | 67.43(67.27-67.58) | 58.22(57.99-58.45) | 63.60(63.37-63.84)     | 62.96(62.74-63.18)    | 44.92(44.73-45.12)     |
| ≤6                     | 62.61(62.34-62.88) | 51.23(50.90-51.56) | 70.01(69.60-70.43)     | 45.81(45.56-46.06)    | 64.38(63.91-64.85)     |
| SII                    | 9.83               | 8.98               | 36.53                  | 13.72                 | 20.49                  |
| P for SII trend        |                    |                    | 0.454                  |                       |                        |
| <b>Income</b>          |                    |                    |                        |                       |                        |
| Q1 (highest)           | 57.16(57.08-57.24) | 47.07(47.00-47.14) | 41.17(41.11-41.24)     | 45.32(45.24-45.39)    | 42.06(41.99-42.13)     |
| Q2                     | 62.02(61.93-62.10) | 53.96(53.88-54.04) | 47.86(47.79-47.93)     | 47.06(46.98-47.13)    | 47.44(47.37-47.51)     |
| Q3                     | 67.39(67.29-67.48) | 56.25(56.17-56.33) | 52.02(51.94-52.09)     | 50.25(50.18-50.32)    | 48.59(48.52-48.67)     |
| Q4 (lowest)            | 70.45(70.35-70.56) | 62.14(62.05-62.22) | 55.48(55.40-55.56)     | 55.07(54.99-55.14)    | 50.06(49.99-50.14)     |
| SII                    | 17.96              | 19.08              | 18.92                  | 12.99                 | 9.98                   |
| P for SII linear trend |                    |                    | 0.105                  |                       |                        |
| <b>Women</b>           |                    |                    |                        |                       |                        |
| Education(yr) ≥13      | 2.91(2.88-2.95)    | 2.47(2.44-2.49)    | 2.82(2.80-2.84)        | 4.30(4.27-4.32)       | 2.61(2.60-2.63)        |
| 10-12                  | 2.85(2.84-2.87)    | 6.53(6.51-6.55)    | 7.50(7.48-7.52)        | 8.82(8.79-8.85)       | 8.24(8.21-8.27)        |
| 7-9                    | 3.42(3.39-3.45)    | 9.15(9.04-9.26)    | 13.22(13.12-13.33)     | 26.92(26.73-27.12)    | 19.35(19.21-19.49)     |
| ≤6                     | 2.62(2.60-2.64)    | 5.31(5.25-5.36)    | 15.22(15.03-15.41)     | 13.11(12.92-13.29)    | 15.08(14.89-15.27)     |
| SII                    | -0.01              | 5.27               | 16.69                  | 20.27                 | 20.55                  |
| P for SII trend        |                    |                    | 0.009                  |                       |                        |
| <b>Income</b>          |                    |                    |                        |                       |                        |
| Q1 (highest)           | 3.47(3.45-3.49)    | 3.50(3.48-3.52)    | 4.24(4.21-4.26)        | 4.69(4.66-4.71)       | 2.81(2.79-2.83)        |
| Q2                     | 2.36(2.34-2.37)    | 3.94(3.91-3.96)    | 4.12(4.10-4.14)        | 4.55(4.53-4.58)       | 4.41(4.39-4.44)        |
| Q3                     | 2.80(2.78-2.82)    | 5.20(5.18-5.23)    | 6.07(6.04-6.10)        | 6.80(6.78-6.83)       | 6.12(6.10-6.15)        |
| Q4 (lowest)            | 6.62(6.59-6.66)    | 9.03(8.99-9.06)    | 9.01(8.97-9.04)        | 10.88(10.84-10.91)    | 10.07(10.04-10.11)     |
| SII                    | 3.82               | 7.22               | 6.48                   | 8.39                  | 9.38                   |
| P for SII linear trend |                    |                    | 0.047                  |                       |                        |

Supplementary table 2. Age-adjusted prevalence (95% CI) and slope index of inequalities (SII) of obesity by SES from 2001 to 2014

|                        | KNHAES II<br>(2001) | KNHANES III<br>(2005) | KNHANES IV<br>(2007-2009) | KNHANES V<br>(2010-2012) | KNHANES VI<br>(2013-2014) |
|------------------------|---------------------|-----------------------|---------------------------|--------------------------|---------------------------|
| <b>Men</b>             |                     |                       |                           |                          |                           |
| Education(yr) ≥13      | 36.40(36.34-36.47)  | 39.99(39.92-40.06)    | 41.78(41.72-41.84)        | 40.84(40.78-40.90)       | 41.37(41.31-41.42)        |
| 10-12                  | 33.08(33.03-33.13)  | 37.94(37.89-38.00)    | 39.87(39.81-39.92)        | 38.83(38.78-38.88)       | 42.05(41.99-42.11)        |
| 7-9                    | 33.23(33.14-33.33)  | 45.11(44.93-45.29)    | 41.27(41.09-41.45)        | 40.33(40.17-40.49)       | 32.90(32.75-33.05)        |
| ≤6                     | 28.58(28.44-28.73)  | 17.16(17.09-17.23)    | 41.24(40.95-41.54)        | 28.98(28.74-29.21)       | 47.57(47.15-47.99)        |
| SII                    | -8.22               | -16.56                | -0.50                     | -10.54                   | 0.08                      |
| P for SII trend        |                     |                       | 0.542                     |                          |                           |
| <b>Income</b>          |                     |                       |                           |                          |                           |
| Q1 (highest)           | 33.88(33.82-33.95)  | 42.86(42.79-42.93)    | 40.04(39.97-40.10)        | 41.71(41.64-41.78)       | 42.22(42.16-42.29)        |
| Q2                     | 35.44(35.38-35.51)  | 40.01(39.94-40.08)    | 40.50(40.44-40.57)        | 38.90(38.83-38.96)       | 39.38(39.32-39.45)        |
| Q3                     | 31.99(31.93-32.06)  | 34.15(34.08-34.21)    | 40.24(40.17-40.31)        | 40.86(40.79-40.92)       | 45.56(45.49-45.62)        |
| Q4 (lowest)            | 34.33(34.26-34.40)  | 35.43(35.36-35.49)    | 38.98(38.91-39.05)        | 34.46(34.40-34.52)       | 38.45(38.39-38.51)        |
| SII                    | -0.88               | -11.40                | -1.36                     | -7.97                    | -2.05                     |
| P for SII linear trend |                     |                       | 0.940                     |                          |                           |
| <b>Women</b>           |                     |                       |                           |                          |                           |
| Education(yr) ≥13      | 18.04(17.94-18.14)  | 19.07(18.92-19.22)    | 16.70(16.64-16.76)        | 18.90(18.85-18.96)       | 16.07(16.03-16.11)        |
| 10-12                  | 29.99(29.92-30.05)  | 28.80(28.74-28.86)    | 24.77(24.72-24.81)        | 29.91(29.86-29.96)       | 24.32(24.27-24.36)        |
| 7-9                    | 49.81(49.65-49.98)  | 35.23(35.12-35.33)    | 31.40(31.28-31.52)        | 36.96(36.80-37.12)       | 32.23(32.08-32.38)        |
| ≤6                     | 38.00(37.84-38.15)  | 34.50(34.39-34.62)    | 42.94(42.71-43.18)        | 35.07(34.88-35.26)       | 50.83(50.49-51.16)        |
| SII                    | 32.50               | 21.32                 | 31.76                     | 23.51                    | 40.66                     |
| P for SII trend        |                     |                       | 0.487                     |                          |                           |
| <b>Income</b>          |                     |                       |                           |                          |                           |
| Q1 (highest)           | 27.20(27.14-27.26)  | 23.77(23.72-23.82)    | 22.51(22.46-22.56)        | 21.61(21.56-21.66)       | 16.17(16.13-16.21)        |
| Q2                     | 30.01(29.94-30.07)  | 31.52(31.46-31.58)    | 23.51(23.46-23.56)        | 26.58(26.52-26.63)       | 24.04(23.99-24.09)        |
| Q3                     | 31.30(31.24-31.37)  | 30.89(30.83-30.95)    | 29.79(29.74-29.85)        | 29.19(29.14-29.25)       | 27.61(27.55-27.66)        |
| Q4 (lowest)            | 34.96(34.88-35.03)  | 33.07(33.00-33.13)    | 31.65(31.59-31.71)        | 33.72(33.66-33.78)       | 29.87(29.81-29.93)        |
| SII                    | 9.76                | 10.78                 | 13.43                     | 15.53                    | 17.86                     |
| P for SII linear trend |                     |                       | 0.023                     |                          |                           |

Supplementary table 3. Age-adjusted prevalence (95% CI) and slope index of inequalities (SII) of diabetes by SES from 2005 to 2014

|               |                        | KNHANES III<br>(2005) | KNHANES IV<br>(2007-2009) | KNHANES V<br>(2010-2012) | KNHANES VI<br>(2013-2014) |
|---------------|------------------------|-----------------------|---------------------------|--------------------------|---------------------------|
| <b>Men</b>    |                        |                       |                           |                          |                           |
| Education(yr) | ≥13                    | 8.09(8.05-8.12)       | 8.26(8.23-8.29)           | 7.29(7.27-7.32)          | 8.87(8.85-8.90)           |
|               | 10-12                  | 9.43(9.40-9.47)       | 8.89(8.86-8.92)           | 9.49(9.47-9.52)          | 10.32(10.29-10.35)        |
|               | 7-9                    | 11.27(11.20-11.35)    | 10.10(10.04-10.15)        | 9.09(9.04-9.14)          | 14.18(14.07-14.29)        |
|               | ≤6                     | 10.20(10.15-10.26)    | 7.60(7.55-7.65)           | 11.06(10.92-11.19)       | 9.42(9.36-9.49)           |
|               | SII                    | 3.56                  | 0.41                      | 4.13                     | 3.66                      |
|               | P for SII trend        |                       | 0.602                     |                          |                           |
| Income        | Q1 (highest)           | 10.35(10.32-10.39)    | 7.94(7.91-7.97)           | 9.27(9.24-9.31)          | 9.52(9.49-9.55)           |
|               | Q2                     | 6.61(6.58-6.64)       | 8.60(8.56-8.63)           | 7.29(7.26-7.31)          | 8.14(8.11-8.17)           |
|               | Q3                     | 9.00(8.96-9.03)       | 7.83(7.80-7.86)           | 8.62(8.59-8.65)          | 9.81(9.77-9.84)           |
|               | Q4 (lowest)            | 10.38(10.34-10.42)    | 11.35(11.31-11.39)        | 9.77(9.74-9.80)          | 12.17(12.13-12.21)        |
|               | SII                    | 1.05                  | 3.75                      | 1.16                     | 3.83                      |
|               | P for SII linear trend |                       | 0.576                     |                          |                           |
| <b>Women</b>  |                        |                       |                           |                          |                           |
| Education(yr) | ≥13                    | 0.58(0.58-0.59)       | 2.81(2.78-2.84)           | 3.80(3.76-3.83)          | 3.86(3.83-3.89)           |
|               | 10-12                  | 5.75(5.72-5.78)       | 5.15(5.13-5.18)           | 5.49(5.47-5.52)          | 5.64(5.62-5.67)           |
|               | 7-9                    | 7.65(7.59-7.70)       | 5.32(5.28-5.36)           | 5.04(5.00-5.07)          | 7.45(7.38-7.52)           |
|               | ≤6                     | 7.17(7.14-7.21)       | 9.16(9.08-9.23)           | 8.14(8.05-8.23)          | 7.34(7.27-7.41)           |
|               | SII                    | 8.92                  | 7.00                      | 4.55                     | 5.06                      |
|               | P for SII trend        |                       | 0.048                     |                          |                           |
| Income        | Q1 (highest)           | 6.11(6.08-6.14)       | 3.94(3.92-3.96)           | 2.85(2.83-2.87)          | 4.30(4.28-4.32)           |
|               | Q2                     | 5.11(5.08-5.13)       | 4.16(4.14-4.19)           | 4.93(4.90-4.95)          | 4.60(4.58-4.63)           |
|               | Q3                     | 6.41(6.38-6.44)       | 6.71(6.68-6.74)           | 6.36(6.33-6.38)          | 5.06(5.04-5.09)           |
|               | Q4 (lowest)            | 4.41(4.39-4.44)       | 7.51(7.47-7.54)           | 6.86(6.83-6.89)          | 7.89(7.86-7.92)           |
|               | SII                    | -1.51                 | 5.26                      | 5.31                     | 4.45                      |
|               | P for SII linear trend |                       | 0.016                     |                          |                           |

Supplementary table 4. Age-adjusted prevalence (95% CI) and slope index of inequalities (SII) of hypertension by SES from 2001 to 2014

|                        | KNHANES II<br>(2001) | KNHANES III<br>(2005) | KNHANES IV<br>(2007-2009) | KNHANES V<br>(2010-2012) | KNHANES VI<br>(2013-2014) |
|------------------------|----------------------|-----------------------|---------------------------|--------------------------|---------------------------|
| <b>Men</b>             |                      |                       |                           |                          |                           |
| Education(yr) ≥13      | 24.86(24.80-24.92)   | 24.71(24.65-24.77)    | 22.62(22.57-22.67)        | 24.67(24.62-24.72)       | 25.26(25.22-25.31)        |
| 10-12                  | 30.59(30.54-30.65)   | 25.85(25.80-25.90)    | 23.53(23.49-23.58)        | 27.11(27.07-27.16)       | 25.21(25.16-25.25)        |
| 7-9                    | 28.27(28.19-28.36)   | 27.05(26.96-27.13)    | 21.94(21.87-22.01)        | 24.90(24.80-25.00)       | 23.66(23.54-23.78)        |
| ≤6                     | 28.18(28.04-28.31)   | 25.04(24.95-25.13)    | 24.74(24.62-24.86)        | 29.11(28.92-29.31)       | 28.45(28.24-28.67)        |
| SII                    | 3.96                 | 1.52                  | 1.37                      | 3.75                     | 1.79                      |
| P for SII trend        |                      |                       | 0.888                     |                          |                           |
| <b>Income</b>          |                      |                       |                           |                          |                           |
| Q1 (highest)           | 24.27(24.21-24.33)   | 26.31(26.25-26.36)    | 21.65(21.60-21.70)        | 24.42(24.37-24.47)       | 23.56(23.51-23.61)        |
| Q2                     | 27.83(27.77-27.89)   | 24.85(24.79-24.91)    | 23.07(23.01-23.12)        | 27.03(26.98-27.09)       | 28.41(28.36-28.47)        |
| Q3                     | 26.58(26.51-26.64)   | 25.99(25.93-26.05)    | 23.47(23.42-23.52)        | 26.46(26.41-26.52)       | 25.31(25.26-25.36)        |
| Q4 (lowest)            | 32.14(32.07-32.21)   | 30.63(30.57-30.70)    | 25.38(25.32-25.43)        | 26.39(26.34-26.44)       | 24.76(24.70-24.81)        |
| SII                    | 8.71                 | 5.86                  | 4.65                      | 2.10                     | 0.15                      |
| P for SII linear trend |                      |                       | 0.038                     |                          |                           |
| <b>Women</b>           |                      |                       |                           |                          |                           |
| Education(yr) ≥13      | 11.84(11.75-11.93)   | 9.05(8.92-9.17)       | 9.23(9.17-9.29)           | 10.74(10.68-10.79)       | 9.67(9.62-9.71)           |
| 10-12                  | 16.73(16.68-16.79)   | 15.10(15.05-15.16)    | 15.91(15.86-15.95)        | 15.08(15.04-15.12)       | 13.01(12.98-13.04)        |
| 7-9                    | 22.37(22.31-22.44)   | 19.26(19.19-19.32)    | 17.67(17.59-17.74)        | 20.47(20.38-20.57)       | 19.36(19.25-19.47)        |
| ≤6                     | 18.75(18.69-18.80)   | 22.40(22.33-22.48)    | 19.55(19.44-19.66)        | 20.86(20.74-20.98)       | 24.26(24.11-24.42)        |
| SII                    | 10.78                | 17.02                 | 13.10                     | 14.39                    | 18.80                     |
| P for SII trend        |                      |                       | 0.060                     |                          |                           |
| <b>Income</b>          |                      |                       |                           |                          |                           |
| Q1 (highest)           | 15.39(15.34-15.44)   | 14.49(14.45-14.54)    | 13.87(13.83-13.91)        | 14.13(14.09-14.17)       | 9.85(9.82-9.88)           |
| Q2                     | 20.03(19.97-20.08)   | 17.69(17.64-17.74)    | 13.72(13.68-13.76)        | 14.53(14.49-14.57)       | 13.26(13.22-13.29)        |
| Q3                     | 17.58(17.53-17.64)   | 17.44(17.40-17.49)    | 16.31(16.27-16.36)        | 17.06(17.01-17.10)       | 18.44(18.40-18.49)        |
| Q4 (lowest)            | 18.00(17.94-18.05)   | 18.47(18.42-18.52)    | 17.59(17.54-17.64)        | 18.15(18.10-18.19)       | 15.37(15.33-15.41)        |
| SII                    | 2.21                 | 4.62                  | 5.48                      | 5.82                     | 8.71                      |
| P for SII linear trend |                      |                       | 0.057                     |                          |                           |

Supplementary table 5. Age-adjusted prevalence (95% CI) and slope index of inequalities (SII) of hypercholesterolemia by SES from 2005 to 2014

|                        | KNHANES III<br>(2005) | KNHANES IV<br>(2007-2009) | KNHANES V<br>(2010-2012) | KNHANES VI<br>(2013-2014) |
|------------------------|-----------------------|---------------------------|--------------------------|---------------------------|
| <b>Men</b>             |                       |                           |                          |                           |
| Education(yr) ≥13      | 7.09(7.06-7.13)       | 9.66(9.62-9.69)           | 11.23(11.19-11.26)       | 12.20(12.17-12.23)        |
| 10-12                  | 8.20(8.18-8.23)       | 9.52(9.50-9.55)           | 12.38(12.35-12.41)       | 13.26(13.23-13.30)        |
| 7-9                    | 4.27(4.24-4.30)       | 10.26(10.19-10.33)        | 9.84(9.78-9.90)          | 16.91(16.77-17.06)        |
| ≤6                     | 7.62(7.56-7.67)       | 8.92(8.81-9.03)           | 8.92(8.86-8.98)          | 12.15(11.95-12.36)        |
| SII                    | -1.40                 | -0.28                     | -3.02                    | 2.80                      |
| P for SII trend        |                       |                           | 0.378                    |                           |
| <b>Income</b>          |                       |                           |                          |                           |
| Q1 (highest)           | 8.03(8.00-8.06)       | 9.89(9.86-9.93)           | 13.06(13.02-13.10)       | 13.63(13.59-13.68)        |
| Q2                     | 4.83(4.80-4.86)       | 8.66(8.62-8.69)           | 8.91(8.87-8.94)          | 14.67(14.63-14.71)        |
| Q3                     | 7.64(7.61-7.68)       | 8.77(8.74-8.81)           | 12.89(12.86-12.93)       | 10.93(10.90-10.97)        |
| Q4 (lowest)            | 8.92(8.89-8.95)       | 10.17(10.13-10.20)        | 12.41(12.37-12.45)       | 11.46(11.43-11.50)        |
| SII                    | 2.27                  | 0.34                      | 0.86                     | -4.08                     |
| P for SII linear trend |                       |                           | 0.085                    |                           |
| <b>Women</b>           |                       |                           |                          |                           |
| Education(yr) ≥13      | 13.45(13.29-13.60)    | 13.08(13.01-13.15)        | 12.24(12.18-12.30)       | 12.38(12.33-12.43)        |
| 10-12                  | 8.36(8.32-8.39)       | 9.71(9.68-9.75)           | 13.72(13.68-13.76)       | 10.99(10.96-11.02)        |
| 7-9                    | 7.05(6.99-7.10)       | 10.34(10.26-10.41)        | 11.15(11.09-11.21)       | 9.75(9.70-9.80)           |
| ≤6                     | 5.16(5.14-5.18)       | 11.85(11.77-11.94)        | 9.82(9.79-9.85)          | 10.36(10.32-10.40)        |
| SII                    | -10.25                | -1.89                     | -3.27                    | -3.20                     |
| P for SII trend        |                       |                           | 0.177                    |                           |
| <b>Income</b>          |                       |                           |                          |                           |
| Q1 (highest)           | 7.95(7.92-7.98)       | 10.24(10.21-10.28)        | 12.44(12.40-12.48)       | 11.81(11.77-11.85)        |
| Q2                     | 7.38(7.35-7.41)       | 9.22(9.19-9.26)           | 12.17(12.14-12.21)       | 9.80(9.77-9.84)           |
| Q3                     | 5.55(5.52-5.57)       | 10.00(9.96-10.03)         | 11.74(11.71-11.78)       | 14.21(14.17-14.25)        |
| Q4 (lowest)            | 7.64(7.60-7.67)       | 10.91(10.87-10.94)        | 13.80(13.76-13.84)       | 11.65(11.62-11.69)        |
| SII                    | -1.08                 | 1.08                      | 1.49                     | 1.58                      |
| P for SII linear trend |                       |                           | 0.535                    |                           |

# BMJ Open

## Trends in socioeconomic inequalities in five major risk factors for cardiovascular disease in the Korean population (Korea National Health and Nutrition Examination Survey, 2001-2014): a cross-sectional study

|                                 |                                                                                                                                                                                                                                                                                                                                                                                                                                                                                                                                                                                                                                                                                                                                                                                                                                                                                                   |
|---------------------------------|---------------------------------------------------------------------------------------------------------------------------------------------------------------------------------------------------------------------------------------------------------------------------------------------------------------------------------------------------------------------------------------------------------------------------------------------------------------------------------------------------------------------------------------------------------------------------------------------------------------------------------------------------------------------------------------------------------------------------------------------------------------------------------------------------------------------------------------------------------------------------------------------------|
| Journal:                        | <i>BMJ Open</i>                                                                                                                                                                                                                                                                                                                                                                                                                                                                                                                                                                                                                                                                                                                                                                                                                                                                                   |
| Manuscript ID                   | bmjopen-2016-014070.R2                                                                                                                                                                                                                                                                                                                                                                                                                                                                                                                                                                                                                                                                                                                                                                                                                                                                            |
| Article Type:                   | Research                                                                                                                                                                                                                                                                                                                                                                                                                                                                                                                                                                                                                                                                                                                                                                                                                                                                                          |
| Date Submitted by the Author:   | 25-Jan-2017                                                                                                                                                                                                                                                                                                                                                                                                                                                                                                                                                                                                                                                                                                                                                                                                                                                                                       |
| Complete List of Authors:       | Kim, Yoon Jung; Hangang Sacred Heart Hospital, Hallym University Medical Center<br>Lee, Ji Sung; Asan Medical Center, University of Ulsan College of Medicine, Clinical Research Center<br>Park, Juri; Hallym University Kangdong Sacred Heart Hospital, Division of Endocrinology and Metabolism, Department of Internal Medicine<br>Choi, Dong Seop; Korea University College of Medicine, Department of Internal Medicine<br>Kim, Doo Man; Hallym University Kangdong Sacred Heart Hospital, Division of Endocrinology and Metabolism, Department of Internal Medicine<br>Lee, Kee-Hyoung ; Korea University College of Medicine, Pediatrics<br>Kim, Ho Yeon ; Inha University Hospital, Department of Obstetrics and Gynecology<br>Kim, Sin Gon; Korea University College of Medicine, Department of Internal Medicine<br>Lee, Juneyoung; Korea University College of Medicine, Biostatistics |
| <b>Primary Subject Heading</b>: | Epidemiology                                                                                                                                                                                                                                                                                                                                                                                                                                                                                                                                                                                                                                                                                                                                                                                                                                                                                      |
| Secondary Subject Heading:      | Cardiovascular medicine, Health policy, Public health                                                                                                                                                                                                                                                                                                                                                                                                                                                                                                                                                                                                                                                                                                                                                                                                                                             |
| Keywords:                       | Health inequality, cardiovascular disease, trend, cardiovascular disease risk factors                                                                                                                                                                                                                                                                                                                                                                                                                                                                                                                                                                                                                                                                                                                                                                                                             |
|                                 |                                                                                                                                                                                                                                                                                                                                                                                                                                                                                                                                                                                                                                                                                                                                                                                                                                                                                                   |

SCHOLARONE™  
Manuscripts



1  
2  
3  
4 **Trends in socioeconomic inequalities in five major risk factors for**  
5 **cardiovascular disease in the Korean population (Korea National Health**  
6 **and Nutrition Examination Survey, 2001-2014): a cross-sectional study**  
7  
8  
9  
10  
11  
12  
13  
14  
15

16 Yoon Jung Kim<sup>1\*</sup>, Ji Sung Lee<sup>2\*</sup>, Juri Park<sup>3</sup>, Dong Seop Choi<sup>4</sup>, Doo Man Kim<sup>3</sup>, Kee-Hyoung  
17 Lee<sup>5</sup>, Ho Yeon Kim<sup>6</sup>, Sin Gon Kim<sup>4†</sup>, Juneyoung Lee<sup>7†</sup>  
18  
19  
20  
21  
22  
23

24 YJK\* and JSL\* contributed equally to this study.  
25

26 SGK<sup>†</sup> and JL<sup>†</sup> contributed equally to this study.  
27  
28  
29  
30  
31

32 <sup>1</sup>Division of Endocrinology and Metabolism, Department of Internal Medicine, Hangang  
33 Sacred Heart Hospital, Hallym University Medical Center, Seoul, Korea  
34  
35

36 <sup>2</sup>Clinical Research Center, Asan Medical Center, University of Ulsan College of Medicine,  
37 Seoul, Korea  
38  
39  
40

41 <sup>3</sup>Division of Endocrinology and Metabolism, Department of Internal Medicine, Kangdong  
42 Sacred Heart Hospital, Hallym University Medical Center, Seoul, Korea  
43  
44  
45

46 <sup>4</sup>Division of Endocrinology and Metabolism, Department of Internal Medicine, Korea  
47 University College of Medicine, Seoul, Korea  
48  
49  
50

51 <sup>5</sup>Department of Pediatrics, Korea University College of Medicine, Seoul, Korea  
52  
53

54 <sup>6</sup>Department of Obstetrics and Gynecology, Inha University Hospital, Incheon, Korea  
55  
56

57 <sup>7</sup>Department of Biostatistics, Korea University College of Medicine, Seoul, Korea  
58  
59  
60

1  
2  
3  
4  
5  
6  
7 **Correspondence to:** Juneyoung Lee, PhD

8  
9  
10 Department of Biostatistics, Korea University College of Medicine, Anam-dong 5-ga,  
11  
12 Seongbuk-gu, Seoul 136-701, Korea

13  
14  
15 Tel: 82-2-920-6436; Fax: 82-2-953-6439; E-mail: [jyleeuf@korea.ac.kr](mailto:jyleeuf@korea.ac.kr)  
16  
17

18  
19  
20  
21 Word count: 3499  
22  
23  
24  
25  
26  
27  
28  
29  
30  
31  
32  
33  
34  
35  
36  
37  
38  
39  
40  
41  
42  
43  
44  
45  
46  
47  
48  
49  
50  
51  
52  
53  
54  
55  
56  
57  
58  
59  
60

## ABSTRACT

**Objectives:** To examine trends in socioeconomic inequalities in major cardiovascular disease (CVD) risk factors among the Korean population

**Design:** Cross-sectional study

**Setting:** A nationally representative population survey database

**Participants:** A total of 42,725 Koreans, aged 25-64 years, who participated in the Korean National Health and Nutrition Examination Survey (KNHANES) II (2001) to VI (2013-2014)

**Main outcome measures:** Trends in socioeconomic inequalities in five major CVD risk factors (smoking, obesity, diabetes, hypertension, hypercholesterolemia)

**Results** Gender differences were noted in the time trends in socioeconomic inequalities in smoking, obesity, diabetes and hypertension. Among men, low socioeconomic status (SES) was associated with higher prevalence of smoking, but not with obesity, diabetes or hypertension. The magnitudes of socioeconomic inequalities in smoking, obesity and diabetes remained unchanged, and the magnitude of the inequality in hypertension decreased over time. However, among women, low SES was associated with higher prevalence of smoking, obesity, diabetes and hypertension. Time trends towards increasing socioeconomic inequalities, measured by income, in smoking, obesity and diabetes were found in women. Unlike the other CVD risk factors, hypercholesterolemia was not associated with socioeconomic inequality.

**Conclusions** SES had a stronger impact on major CVD risk factors among Korean women than men. Moreover, socioeconomic inequalities in smoking, obesity and diabetes worsened among Korean women over time. Public policies to prevent smoking, obesity and diabetes in

women with lower SES are needed to address inequalities.

Keywords: trend, health inequality, cardiovascular disease, cardiovascular disease risk factors

### **Strengths and limitations of the study**

- The strength of this study is that a nationally representative sample was used as the study population.
- The limitation of this study is that a period longer than 14 years could not be used for the investigation of socioeconomic inequalities, as data from KNHANES I (1998) were excluded due to a lack of reliability and there was no available nationally representative data before 1998.
- The steady decline of response rates in the KNHANES could result in underestimation of inequalities.

## INTRODUCTION

Socioeconomic status (SES) has shown inverse associations with cardiovascular disease (CVD) in most industrialised Western countries, such that disadvantaged groups experience higher risks for CVD.[1-2] A considerable portion of the association between SES and CVD has been attributed to the combined effects of inequalities in health-related behaviours, environmental conditions, social structures and contact with and delivery of healthcare services.[3] As CVD mortality and morbidity contribute sizeable proportions to overall health inequality, attempts to reduce these causes of death are public health concerns.[4] Previous studies have shown that a greater decline in the prevalence of CVD risk factors among higher SES groups widened the gap among SES groups over time in the US.[5-6] However, studies in England and Australia failed to provide strong evidence that socioeconomic inequalities in CVD risk factors had increased in recent decades.[7-8]

Korea, a recently developed country, has experienced rapid socioeconomic growth. The per capita gross national income has increased 2.5-fold over the past 14 years (from \$11,000 US in 2001 to \$27,000 US in 2014), but the gap in socioeconomic circumstances has widened during this period.[9-10] Thus, it remains unclear whether the increased overall wealth has improved the health status of all segments of the population.

To our knowledge, no previous study has examined time trends in socioeconomic inequalities with regard to major CVD risk factors in Koreans. The purpose of this study was to examine recent national trends in socioeconomic inequalities in five major CVD risk factors (smoking, obesity, diabetes, hypertension, hypercholesterolemia) using national survey data by gender.

## METHODS

### Study participants

This study was based on data from five consecutive Korean National Health and Nutrition Examination Surveys (KNHANES) conducted from 2001 to 2014. The KNHANES is a national survey that assesses the general health and nutritional status of the Korean population. A detailed description of the survey design and data collection in the KNHANES has been published before.[11] The KNHANES was initiated in 1998 but we excluded the data from KNHANES I (1998) due to a lack of reliability.[12] The response rates were 92.3%, 99.1%, 78.4%, 80.8%, and 78.6% for KNHANES II, III, IV, V, and VI, respectively. In this study, the study population was limited to adults aged 25-64 years to examine trends in socioeconomic inequalities. Considering the applicability of SES (income and education), we excluded survey participants aged younger than 25 years who may not have completed their education or have no job and those older than 64 years who were mostly economically inactive. For the four CVD risk factors (obesity, diabetes, hypertension and hypercholesterolemia), total number of participants in the analysis was 42,725, which included 5,206 participants from the KNHANES II (2001), 4,286 participants from the KNHANES III (2005), 12,407 participants from the KNHANES IV (2007-2009), 12,977 participants from the KNHANES V (2010-2012), and 7,849 participants from the KNHANES VI (2013-2014) (Fig. 1). The total number of participants including in the smoking analysis was 45,522, which is, different from the number included in the analysis of other risk factors because health interview data, instead of health examination data, were used to determine subjects' smoking status. We composed the five data sets for each CVD risk factor individually, excluding the data with missing values for each CVD risk factor.

### **Health interview and health examination survey**

The KNHANES consists of three components: a health interview, a health examination, and a nutrition survey. The health interview survey collects detailed information on SES (e.g. education level, household income), smoking and drinking behaviours, and healthcare utilisation. Prior diagnosis of diabetes and hypertension by a physician and current use of anti-hypertensive and anti-hyperglycaemic agents are included in the questionnaire (for example, for treatment of diabetes, “what is your treatment for diabetes mellitus?”, with the following answer categories: insulin, oral hypoglycemic agents or lifestyle modification.) Height to the nearest 0.1 cm was measured using portable stadiometers. Weight to the nearest 0.1 kg was measured using a portable electronic scale. According to the standard protocol, systolic blood pressure (SBP) and diastolic blood pressure (DBP) were measured by trained nurses using a mercury sphygmomanometer (Baumanometer Desk model; Baum, NY, USA) on the right arm of the subject while sitting after at least 5 min of rest.

### **Blood sample collection and biochemical analysis**

Venous blood samples were obtained from each participant in the morning after fasting for at least 8 h. All samples were processed according to the protocols of KNHANES. After blood collection, an 8 mL serum separating tube for analysing blood lipid level was kept at room temperature for 30 min, and the blood was subsequently centrifuged (3000 rpm, 15 min). A 2 mL sodium fluoride tube for analysing glucose levels was mixed in a roller mixer for 10 min. All blood samples were refrigerated at 2-8°C and then transported to the central laboratory. Within 24 h of blood collection, plasma concentrations of glucose and lipid were assayed

1  
2  
3  
4 using an Advia 1650 (Siemens, NY, USA) in 2005 and 2007 and using a Hitachi Automatic  
5  
6 Analyzer 7600 (Hitachi, Tokyo, Japan) since 2008. Since 2005, all laboratory analyses were  
7  
8 performed according to the protocol and monitored to ensure the values met acceptable  
9  
10 standards of precision and reproducibility in a central laboratory. Because quality control for  
11  
12 the biochemical analysis of blood was started in 2005, we analysed the data of serum glucose  
13  
14 and total cholesterol that were collected since 2005 in this study.  
15  
16  
17  
18  
19

### 20 21 **SES indicators**

22  
23 Education level and income were used as SES indicators. Education level was grouped into  
24  
25 four categories: college or higher ( $\geq 13$  years), high school (10-12 years), middle school (7-9  
26  
27 years), elementary school or less ( $\leq 6$  years). The measure of income was equivalised gross  
28  
29 household income per month, defined as total household income divided by the square root of  
30  
31 the number of household members to adjust for the effect of the number of individuals in the  
32  
33 household. We divided study subjects into four groups according to quartiles of equivalised  
34  
35 household income by gender and age (Q1-Q4; Q1, highest quartile; Q4, lowest quartile).  
36  
37  
38  
39  
40  
41  
42  
43

### 44 **Definition of CVD risk factors**

45  
46 Smoking, obesity, diabetes, hypertension and hypercholesterolemia were examined because  
47  
48 these are major independent risk factors for CVD.[13] Cigarette smoking was defined as a  
49  
50 “yes” answer to both of the following questions: “Have you smoked at least 100 cigarettes in  
51  
52 your entire life?” and “Do you smoke cigarettes now?” Body mass index (BMI) was  
53  
54 calculated as the ratio of weight to height squared ( $\text{kg}/\text{m}^2$ ). Obesity was defined as a BMI of  
55  
56  $\geq 25 \text{ kg}/\text{m}^2$ , according to the re-defined criteria of the World Health Organization for obesity  
57  
58  
59  
60



1  
2  
3  
4 in the Asia-Pacific region.[14] Based on the criteria of the World Health Organization,  
5  
6 diabetes was defined as fasting plasma glucose of  $\geq 126$  mg/dL, a previous diagnosis of  
7  
8 diabetes by a physician, or current use of anti-hyperglycaemic agents or insulin.[15]  
9  
10 According to the criteria of the 7<sup>th</sup> Report of the Joint National Committee, hypertension was  
11  
12 defined as an average SBP and/or DBP  $\geq 140/90$  mmHg or the use of anti-hypertensive  
13  
14 agents.[16] According to the guidelines for cholesterol of the NCEP ATP III,  
15  
16 hypercholesterolemia was defined as a plasma total cholesterol of  $\geq 240$  mg/dL or current use  
17  
18 of cholesterol-lowering agents.[17]  
19  
20  
21  
22  
23  
24

### 25 **Statistical analysis**

26  
27  
28 The demographic characteristics of the study participants are presented as the means  $\pm$   
29  
30 standard errors (SE) or age-adjusted prevalence (SE). Comparisons of the characteristics  
31  
32 across survey periods were performed using analysis of variance (ANOVA) or  $\chi^2$  test, as  
33  
34 appropriate, and  $\chi^2$  linear trend test was also used. To adjust differences in results from  
35  
36 changes in age structure of each survey, age-adjusted prevalence was calculated using a direct  
37  
38 standardization method based on 2010 Korea Census.  
39  
40  
41

42 The relative index of inequality (RII), a measure of effect that permits meaningful  
43  
44 comparisons of socioeconomic health inequalities over survey periods was computed. The  
45  
46 RII enables direct comparisons between SES variables with regard to the proportions of the  
47  
48 population in different categories. To obtain the RII for each indicator of SES, a score  
49  
50 between 0 (for the highest SES) and 1 (for the lowest SES) was assigned to each category  
51  
52 based on the proportion of subjects above the midpoint in the category. For example, if 10%  
53  
54 of the subjects were in the highest educational category, participants in the group were  
55  
56  
57  
58  
59  
60

1  
2  
3  
4 represented by the range 0-0.1 and given a score of 0.05 (half of 0.1). If 20% of the  
5  
6  
7 population were in the next group, participants in the group were given a score of 0.2 (0.1  
8  
9 plus 0.2/2). The RII was obtained by regressing the outcome on each of the SES scores and  
10  
11 was directly interpretable for each SES indicator used to compare participants with lowest  
12  
13 SES (1) with those with the highest SES (0). In this study, the RII of major CVD risk factors  
14  
15 is presented using the odds ratio and 95% confidence interval computed from binary logistic  
16  
17 regression analysis adjusted for age. Trends in the RII were examined by estimating the p  
18  
19 value for an interaction term of SES indicator and the variables that identified the year of the  
20  
21 data in the model. Survey year was entered into the model as a numerical value (e.g., 2001  
22  
23 for KNHANES II). We also calculated a slope index of inequality (SII) for each risk factor in  
24  
25 each survey. The SII was measured using the regression coefficient (slope) for the linear  
26  
27 relationship between the prevalence of a CVD risk factor in a socioeconomic category in the  
28  
29 overall distribution of the SES, and relative rank of that category in the overall distribution of  
30  
31 the SES. The regression coefficient can be interpreted as the absolute difference in prevalence  
32  
33 across the entire SES distribution. In addition, we investigated gender and SES association in  
34  
35 an interaction model to examine whether there was a significant difference between the  
36  
37 trends in men and women.  
38  
39  
40  
41  
42

43 As data from KNHANES were derived from stratified and multi-stage clustered probability  
44  
45 sampling methods to represent the entire South Korean population, population weightings  
46  
47 were also applied in the analyses. The PROC SURVEY procedure was used to apply  
48  
49 stratification, primary sampling units and population weights. Significance levels were set at  
50  
51 a two tailed p-value <0.05. All analyses were conducted using the SAS software version 9.4  
52  
53 (SAS Institute, Cary, NC).  
54  
55  
56  
57  
58  
59  
60

## RESULTS

The general characteristics of participants in the KNHANES II (2001) to VI (2013-2014) are shown in Table 1. The mean age of participants increased over time ( $41.2 \pm 0.2$  to  $43.8 \pm 0.2$  years and  $41.6 \pm 0.2$  to  $44.2 \pm 0.2$  years for men and women, respectively). The proportion of participants with college or higher education ( $\geq 13$  years) increased gradually, from 39% to 47% for men and from 24% to 39% for women from 2001 to 2014. There were significant interaction effects between gender and SES on RII except for hypercholesterolemia. The p-values for gender by education interaction were  $<0.001$ ,  $<0.001$ ,  $<0.001$ ,  $<0.001$  and 0.768 for smoking, obesity, diabetes, hypertension and hypercholesterolemia, respectively, while those for the interaction of gender by income were  $<0.001$ ,  $<0.001$ , 0.033, 0.048 and 0.302, respectively. Therefore, we examined the trends in socioeconomic inequalities for major CVD risk factors by gender.

### Smoking

Over the past 14 years, the age-adjusted smoking prevalence decreased significantly, from 64% to 47% in men, but it did not change in women (Table 1). Low SES was associated with a high prevalence of smoking in both genders (Table 2). Among Korean men, time trends in socioeconomic inequalities in smoking prevalence by education and income levels were generally stable during 2001-2014. In contrast, a significantly increasing trend in socioeconomic inequalities with regard to smoking prevalence was noted among women (Table 2).

Table 1 General characteristics of the study population (25-64 years) from 2001 to 2014

|                      | KNHANES*   |             |              |              |               | P-value† |
|----------------------|------------|-------------|--------------|--------------|---------------|----------|
|                      | II<br>2001 | III<br>2005 | IV<br>2007-9 | V<br>2010-12 | VI<br>2013-14 |          |
| <b>Men</b>           |            |             |              |              |               |          |
| n                    | 3164       | 2868        | 5318         | 5501         | 3315          |          |
| Age                  | 41.2±0.2   | 41.1±0.3    | 42.4±0.2     | 43.1±0.2     | 43.8±0.2      | <0.001   |
| BMI                  | 23.9±0.1   | 24.2±0.1    | 24.3±0.1     | 24.3±0.1     | 24.6±0.1      | <0.001   |
| Education (yr)       |            |             |              |              |               | <0.001   |
| ≤6                   | 9.4 (0.8)  | 8.3 (0.6)   | 9.6 (0.5)    | 8.3 (0.5)    | 7.2 (0.6)     |          |
| 7-9                  | 12.1 (0.7) | 10.0 (0.7)  | 10.5 (0.5)   | 10.1 (0.5)   | 8.8 (0.6)     |          |
| 10-12                | 39.8 (1.2) | 42.4 (1.2)  | 39.4 (0.9)   | 38.6 (0.8)   | 36.9 (1.1)    |          |
| ≥13                  | 38.7 (1.6) | 39.2 (1.4)  | 40.5 (1.0)   | 43.0 (0.9)   | 47.1 (1.2)    |          |
| Income‡              |            |             |              |              |               | 0.234    |
| Q1(highest)          | 22.3 (1.3) | 26.7 (1.2)  | 24.8 (0.8)   | 26.5 (0.8)   | 25.0 (1.0)    |          |
| Q2                   | 24.0 (1.0) | 25.2 (1.0)  | 24.2 (0.7)   | 25.6 (0.8)   | 26.0 (0.9)    |          |
| Q3                   | 26.6 (1.0) | 23.1 (0.9)  | 25.4 (0.7)   | 24.5 (0.7)   | 24.7 (0.9)    |          |
| Q4(lowest)           | 27.0 (1.4) | 25.0 (1.3)  | 25.7 (1.0)   | 23.5 (0.8)   | 24.2 (1.2)    |          |
| <b>Prevalence§</b>   |            |             |              |              |               |          |
| Smoking              | 64.0       | 54.8        | 49.0         | 49.7         | 47.1          | 0.03     |
| Obesity              | 33.9       | 38.4        | 39.7         | 38.8         | 41.4          | 0.038    |
| Diabetes             | 7.3        | 9.2         | 8.9          | 8.8          | 9.9           | 0.076    |
| Hypertension         | 27.9       | 26.8        | 23.3         | 26.0         | 25.6          | 0.404    |
| Hypercholesterolemia | 8.6        | 7.4         | 9.5          | 11.7         | 12.6          | 0.062    |
| <b>Women</b>         |            |             |              |              |               |          |
| n                    | 3509       | 3276        | 7048         | 7410         | 4497          |          |
| Age                  | 41.6±0.3   | 41.6±0.3    | 42.7±0.2     | 43.5±0.2     | 44.2±0.2      | <0.001   |
| BMI                  | 23.4±0.1   | 23.4±0.1    | 23.2±0.1     | 23.3±0.1     | 23.1±0.1      | 0.018    |
| Education            |            |             |              |              |               | <0.001   |
| ≤6                   | 19.2 (1.1) | 17.3 (0.9)  | 17.2 (0.6)   | 15.5 (0.6)   | 12.5 (0.7)    |          |
| 7-9                  | 14.6 (0.7) | 13.2 (0.7)  | 12.3 (0.5)   | 11.6 (0.5)   | 10.2 (0.5)    |          |
| 10-12                | 42.2 (1.1) | 42.0 (1.3)  | 40.6 (0.7)   | 38.9 (0.8)   | 38.3 (0.9)    |          |
| ≥13                  | 24.1 (1.4) | 27.6 (1.5)  | 29.9 (0.9)   | 34.0 (0.9)   | 39.1 (1.1)    |          |
| Income‡              |            |             |              |              |               | 0.133    |
| Q1(highest)          | 23.1 (1.3) | 25.9 (1.1)  | 24.3 (0.8)   | 27.6 (0.8)   | 24.7 (0.9)    |          |
| Q2                   | 24.0 (0.9) | 25.7 (1.0)  | 25.3 (0.7)   | 25.8 (0.7)   | 25.0 (0.9)    |          |
| Q3                   | 26.1 (0.9) | 24.2 (0.9)  | 25.2 (0.7)   | 24.4 (0.7)   | 25.1 (0.9)    |          |
| Q4(lowest)           | 26.9 (1.5) | 24.2 (1.3)  | 25.2 (0.9)   | 22.3 (0.7)   | 25.2 (1.2)    |          |
| <b>Prevalence§</b>   |            |             |              |              |               |          |
| Smoking              | 3.7        | 5.4         | 6.0          | 6.9          | 5.8           | 0.125    |
| Obesity              | 30.8       | 29.7        | 26.8         | 28.0         | 24.4          | 0.036    |
| Diabetes             | 5.9        | 5.3         | 5.7          | 5.4          | 5.4           | 0.177    |
| Hypertension         | 17.7       | 16.9        | 15.3         | 16.1         | 14.2          | 0.034    |
| Hypercholesterolemia | 8.8        | 7.0         | 10.1         | 12.5         | 11.9          | <0.001   |

Values given are n, prevalence (SE) or mean ± SE

1  
2  
3  
4  
5  
6  
7  
8  
9  
10  
11  
12  
13  
14  
15  
16  
17  
18  
19  
20  
21  
22  
23  
24  
25  
26  
27  
28  
29  
30  
31  
32  
33  
34  
35  
36  
37  
38  
39  
40  
41  
42  
43  
44  
45  
46  
47  
48  
49  
50  
51  
52  
53  
54  
55  
56  
57  
58  
59  
60

\*KNHANES (Korean National Health and Nutrition Examination Survey)  
†P-value by ANOVA or  $\chi^2$  test  
‡Quartiles based on equivalised household income  
§Age-adjusted prevalence

For peer review only

Table 2 Age-adjusted odds ratios (OR) and 95% confidence interval (CI) and relative indices of inequalities (RII) in smoking by SES from 2001 to 2014

|                | KNHANES          |                  |                  |                  |                   |
|----------------|------------------|------------------|------------------|------------------|-------------------|
|                | II<br>2001       | III<br>2005      | IV<br>2007-9     | V<br>2010-12     | VI<br>2013-14     |
| <b>Men</b>     |                  |                  |                  |                  |                   |
| Education (yr) |                  |                  |                  |                  |                   |
| ≥13            | 1                | 1                | 1                | 1                | 1                 |
| 10-12          | 1.75 (1.45-2.12) | 1.86 (1.53-2.25) | 1.57 (1.37-1.81) | 1.47 (1.27-1.71) | 1.48 (1.23-1.78)  |
| 7-9            | 1.48 (1.14-1.93) | 1.57 (1.13-2.18) | 2.16 (1.72-2.71) | 1.62 (1.27-2.05) | 1.25 (0.92-1.72)  |
| ≤6             | 2.41 (1.72-3.37) | 2.22 (1.62-3.05) | 1.95 (1.53-2.48) | 1.71 (1.32-2.22) | 1.77 (1.26-2.49)  |
| RII (95% CI)   | 2.73 (1.97-3.79) | 2.75 (2.00-3.79) | 2.74 (2.16-3.48) | 2.16 (1.69-2.77) | 2.17 (1.57-3.00)  |
| P for trend    | 0.193            |                  |                  |                  |                   |
| Income         |                  |                  |                  |                  |                   |
| Q1(highest)    | 1                | 1                | 1                | 1                | 1                 |
| Q2             | 1.23 (0.97-1.55) | 1.34 (1.05-1.72) | 1.31 (1.11-1.56) | 1.09 (0.91-1.30) | 1.26 (1.00-1.59)  |
| Q3             | 1.49 (1.17-1.91) | 1.50 (1.21-1.86) | 1.56 (1.32-1.85) | 1.23 (1.01-1.49) | 1.34 (1.07-1.66)  |
| Q4(lowest)     | 1.74 (1.35-2.24) | 1.87 (1.46-2.40) | 1.79 (1.51-2.12) | 1.50 (1.24-1.81) | 1.43 (1.15-1.79)  |
| RII (95% CI)   | 2.10 (1.53-2.89) | 2.22 (1.63-3.02) | 2.16 (1.74-2.68) | 1.71 (1.34-2.18) | 1.57 (1.19-2.08)  |
| P for trend    | 0.087            |                  |                  |                  |                   |
| <b>Women</b>   |                  |                  |                  |                  |                   |
| Education (yr) |                  |                  |                  |                  |                   |
| ≥13            | 1                | 1                | 1                | 1                | 1                 |
| 10-12          | 1.25 (0.75-2.09) | 3.69 (2.07-6.57) | 3.95 (2.78-5.62) | 2.80 (1.97-4.00) | 4.08 (2.67-6.22)  |
| 7-9            | 1.55 (0.76-3.15) | 4.04 (1.95-8.34) | 6.47 (3.90-10.7) | 6.15 (3.65-10.4) | 7.75 (4.12-14.6)  |
| ≤6             | 1.98 (1.00-3.90) | 4.12 (1.92-8.86) | 7.59 (4.42-13.0) | 5.52 (3.06-9.9)  | 9.53 (4.88-18.6)  |
| RII (95% CI)   | 1.75 (0.87-3.52) | 3.41 (1.78-6.55) | 8.27 (5.05-13.6) | 6.81 (3.86-12.0) | 10.29 (5.23-20.2) |
| P for trend    | <0.001           |                  |                  |                  |                   |
| Income         |                  |                  |                  |                  |                   |
| Q1(highest)    | 1                | 1                | 1                | 1                | 1                 |
| Q2             | 0.53 (0.29-0.95) | 1.05 (0.58-1.91) | 0.95 (0.64-1.42) | 0.98 (0.66-1.46) | 1.54 (0.82-2.89)  |
| Q3             | 0.67 (0.39-1.13) | 1.50 (0.90-2.51) | 1.46 (1.02-2.09) | 1.48 (0.99-2.23) | 2.28 (1.29-4.00)  |
| Q4(lowest)     | 1.53 (0.95-2.47) | 2.74 (1.68-4.46) | 2.23 (1.57-3.17) | 2.53 (1.75-3.65) | 3.95 (2.34-6.66)  |
| RII (95% CI)   | 1.92 (0.88-4.21) | 4.45 (2.26-8.76) | 3.36 (2.10-5.39) | 4.11 (2.46-6.88) | 6.27 (3.22-12.20) |
| P for trend    | 0.043            |                  |                  |                  |                   |

## Obesity

We found significant increased trends in the mean BMI (23.9 kg/m<sup>2</sup> in 2001 and 24.6 kg/m<sup>2</sup> in 2014,  $p < 0.001$ ) and the age-adjusted prevalence of obesity (34% for 2001 and 41% for 2014,  $p = 0.038$ ) over time in men (Table 1). In contrast, women showed decreasing trends in mean BMI and the age-adjusted prevalence of obesity (23.4 kg/m<sup>2</sup> in 2001 and 23.1 kg/m<sup>2</sup> in 2014,  $p = 0.018$ , 31% in 2001 and 24% in 2014,  $p = 0.036$ ; Table 1). Time trends in socioeconomic inequalities in obesity were stable among men; however, a time trend toward increasing inequality in obesity by income was noted in women (1.72, 1.19-2.48 in 2001; 2.69, 2.02-3.59 in 2014,  $p = 0.03$ , RII, 95% CI, respectively; Table 3).

## Diabetes

The age-adjusted prevalence of diabetes did not change significantly over time in either gender (Table 1). Although no significant time trend in socioeconomic inequality for diabetes prevalence was seen in men, significantly increasing inequality in diabetes prevalence was noticed in women, especially by income (0.76, 0.36-1.58 in 2001; 2.56, 1.55-4.22 in 2014, RII, 95% CI,  $p = 0.01$ , respectively; Table 4).

## Hypertension

The age-adjusted prevalence of hypertension did not change significantly over time among men (Table 1). However, the age-adjusted prevalence of hypertension was decreased over time among women. There were also gender differences in the time trend with regard to socioeconomic inequalities in hypertension (Table 5). In men, socioeconomic differences

Table 3 Age-adjusted OR, 95% CI and RII in obesity by SES from 2001 to 2014

|                | KNHANES          |                  |                  |                  |                  |
|----------------|------------------|------------------|------------------|------------------|------------------|
|                | II<br>2001       | III<br>2005      | IV<br>2007-9     | V<br>2010-12     | VI<br>2013-14    |
| <b>Men</b>     |                  |                  |                  |                  |                  |
| Education (yr) |                  |                  |                  |                  |                  |
| ≥13            | 1                | 1                | 1                | 1                | 1                |
| 10-12          | 0.96 (0.78-1.20) | 0.86 (0.66-1.12) | 0.91 (0.79-1.04) | 0.89 (0.76-1.04) | 1.03 (0.86-1.23) |
| 7-9            | 0.90 (0.64-1.26) | 0.90 (0.57-1.44) | 0.80 (0.65-1.00) | 0.88 (0.67-1.14) | 0.94 (0.68-1.30) |
| ≤6             | 0.83 (0.55-1.23) | 0.43 (0.27-0.67) | 0.74 (0.58-0.93) | 0.64 (0.48-0.84) | 0.80 (0.57-1.11) |
| RII (95% CI)   | 0.95 (0.66-1.38) | 0.63 (0.40-0.98) | 0.74 (0.58-0.94) | 0.79 (0.60-1.03) | 0.98 (0.72-1.34) |
| P for trend    | 0.673            |                  |                  |                  |                  |
| Income         |                  |                  |                  |                  |                  |
| Q1(highest)    | 1                | 1                | 1                | 1                | 1                |
| Q2             | 1.15 (0.88-1.51) | 0.89 (0.63-1.26) | 1.02 (0.86-1.21) | 0.89 (0.73-1.08) | 0.90 (0.73-1.10) |
| Q3             | 0.92 (0.70-1.20) | 0.71 (0.52-0.97) | 1.02 (0.84-1.23) | 0.97 (0.81-1.17) | 1.15 (0.91-1.44) |
| Q4(lowest)     | 1.11 (0.83-1.47) | 0.76 (0.55-1.06) | 0.96 (0.80-1.15) | 0.74 (0.61-0.90) | 0.85 (0.69-1.05) |
| RII (95% CI)   | 1.02 (0.71-1.45) | 0.66 (0.43-1.02) | 0.95 (0.75-1.20) | 0.72 (0.57-0.92) | 0.91 (0.70-1.20) |
| P for trend    | 0.778            |                  |                  |                  |                  |
| <b>Women</b>   |                  |                  |                  |                  |                  |
| Education (yr) |                  |                  |                  |                  |                  |
| ≥13            | 1                | 1                | 1                | 1                | 1                |
| 10-12          | 2.64 (1.93-3.60) | 1.99 (1.43-2.77) | 1.74 (1.46-2.08) | 1.90 (1.59-2.28) | 1.76 (1.43-2.18) |
| 7-9            | 5.53 (3.83-7.98) | 2.84 (1.86-4.34) | 2.49 (1.98-3.12) | 2.45 (1.92-3.12) | 2.92 (2.16-3.96) |
| ≤6             | 3.79 (2.52-5.72) | 3.42 (2.28-5.15) | 3.55 (2.81-4.50) | 2.65 (2.09-3.37) | 3.99 (2.92-5.45) |
| RII (95% CI)   | 3.19 (2.23-4.57) | 3.45 (2.17-5.47) | 3.57 (2.83-4.51) | 2.93 (2.29-3.73) | 4.01 (2.94-5.49) |
| P for trend    | 0.617            |                  |                  |                  |                  |
| Income         |                  |                  |                  |                  |                  |
| Q1(highest)    | 1                | 1                | 1                | 1                | 1                |
| Q2             | 1.17 (0.90-1.51) | 1.50 (1.06-2.11) | 1.05 (0.87-1.26) | 1.32 (1.07-1.63) | 1.65 (1.29-2.10) |
| Q3             | 1.30 (0.97-1.73) | 1.43 (1.03-1.98) | 1.48 (1.24-1.77) | 1.51 (1.25-1.83) | 1.97 (1.58-2.47) |
| Q4(lowest)     | 1.53 (1.15-2.03) | 1.63 (1.16-2.29) | 1.61 (1.34-1.93) | 1.88 (1.54-2.29) | 2.21 (1.74-2.81) |
| RII (95% CI)   | 1.72 (1.19-2.48) | 1.73 (1.15-2.61) | 2.03 (1.61-2.56) | 2.21 (1.73-2.83) | 2.69 (2.02-3.59) |
| P for trend    | 0.032            |                  |                  |                  |                  |



Table 4 Age-adjusted OR, 95% CI and RII in diabetes by SES from 2005 to 2014

|                | KNHAENS          |                  |                  |                  |
|----------------|------------------|------------------|------------------|------------------|
|                | III<br>2005      | IV<br>2007-9     | V<br>2010-12     | VI<br>2013-14    |
| <b>Men</b>     |                  |                  |                  |                  |
| Education (yr) |                  |                  |                  |                  |
| ≥13            | 1                | 1                | 1                | 1                |
| 10-12          | 1.21 (0.72-2.03) | 0.98 (0.74-1.28) | 1.39 (1.05-1.85) | 1.14 (0.82-1.57) |
| 7-9            | 1.20 (0.64-2.25) | 1.05 (0.73-1.52) | 1.41 (0.96-2.06) | 1.13 (0.71-1.81) |
| ≤6             | 1.42 (0.77-2.59) | 0.92 (0.64-1.32) | 1.30 (0.88-1.90) | 1.06 (0.65-1.73) |
| RII (95% CI)   | 1.41 (0.72-2.77) | 0.91 (0.59-1.40) | 1.38 (0.91-2.09) | 1.09 (0.64-1.85) |
| P for trend    |                  | 0.838            |                  |                  |
| Income         |                  |                  |                  |                  |
| Q1(highest)    | 1                | 1                | 1                | 1                |
| Q2             | 0.53 (0.30-0.93) | 1.12 (0.81-1.56) | 0.76 (0.54-1.07) | 0.86 (0.58-1.30) |
| Q3             | 0.84 (0.49-1.43) | 0.96 (0.69-1.32) | 0.90 (0.64-1.27) | 1.06 (0.73-1.55) |
| Q4(lowest)     | 0.93 (0.57-1.53) | 1.48 (1.09-2.01) | 1.06 (0.77-1.46) | 1.34 (0.92-1.95) |
| RII (95% CI)   | 1.08 (0.53-2.18) | 1.53 (1.02-2.30) | 1.17 (0.76-1.79) | 1.55 (0.95-2.56) |
| P for trend    |                  | 0.557            |                  |                  |
| <b>Women</b>   |                  |                  |                  |                  |
| Education (yr) |                  |                  |                  |                  |
| ≥13            | 1                | 1                | 1                | 1                |
| 10-12          | 2.69 (1.11-6.53) | 2.04 (1.28-3.23) | 2.10 (1.30-3.40) | 1.38 (0.89-2.12) |
| 7-9            | 3.30 (1.00-10.9) | 1.76 (1.02-3.05) | 2.23 (1.26-3.96) | 1.76 (1.02-3.02) |
| ≤6             | 4.33 (1.42-13.3) | 3.29 (1.93-5.59) | 2.85 (1.62-5.02) | 1.68 (0.99-2.87) |
| RII (95% CI)   | 3.69 (0.99-13.8) | 3.33 (1.99-5.57) | 2.61 (1.57-4.35) | 1.92 (1.14-3.23) |
| P for trend    |                  | 0.254            |                  |                  |
| Income         |                  |                  |                  |                  |
| Q1(highest)    | 1                | 1                | 1                | 1                |
| Q2             | 0.86 (0.46-1.59) | 1.06 (0.70-1.59) | 1.84 (1.21-2.79) | 1.13 (0.72-1.78) |
| Q3             | 1.10 (0.62-1.98) | 1.75 (1.23-2.50) | 2.36 (1.55-3.57) | 1.23 (0.79-1.91) |
| Q4(lowest)     | 0.71 (0.39-1.31) | 1.99 (1.39-2.87) | 2.56 (1.72-3.82) | 2.04 (1.38-3.01) |
| RII (95% CI)   | 0.76 (0.36-1.58) | 2.80 (1.77-4.42) | 2.90 (1.89-4.47) | 2.56 (1.55-4.22) |
| P for trend    |                  | 0.015            |                  |                  |

Table 5 Age-adjusted OR, 95% CI and RII of hypertension by SES from 2001 to 2014

|                | KNHANES          |                  |                  |                  |                  |
|----------------|------------------|------------------|------------------|------------------|------------------|
|                | II<br>2001       | III<br>2005      | IV<br>2007-9     | V<br>2010-12     | VI<br>2013-14    |
| <b>Men</b>     |                  |                  |                  |                  |                  |
| Education (yr) |                  |                  |                  |                  |                  |
| ≥13            | 1                | 1                | 1                | 1                | 1                |
| 10-12          | 1.43 (1.08-1.89) | 1.03 (0.75-1.40) | 1.03 (0.86-1.25) | 1.15 (0.97-1.38) | 0.97 (0.78-1.22) |
| 7-9            | 1.22 (0.84-1.78) | 1.50 (0.96-2.36) | 0.98 (0.77-1.24) | 1.12 (0.87-1.44) | 0.93 (0.69-1.24) |
| ≤6             | 1.17 (0.77-1.79) | 1.31 (0.85-2.02) | 1.08 (0.84-1.40) | 1.15 (0.89-1.49) | 1.01 (0.70-1.47) |
| RII (95% CI)   | 1.34 (0.88-2.03) | 1.41 (0.90-2.20) | 1.08 (0.82-1.42) | 1.16 (0.88-1.52) | 0.93 (0.66-1.32) |
| P for trend    | 0.133            |                  |                  |                  |                  |
| Income         |                  |                  |                  |                  |                  |
| Q1(highest)    | 1                | 1                | 1                | 1                | 1                |
| Q2             | 1.21 (0.86-1.69) | 0.87 (0.59-1.29) | 1.09 (0.88-1.35) | 1.13 (0.91-1.42) | 1.28 (0.95-1.71) |
| Q3             | 1.10 (0.76-1.59) | 0.95 (0.70-1.29) | 1.11 (0.89-1.39) | 1.11 (0.89-1.37) | 1.09 (0.83-1.43) |
| Q4(lowest)     | 1.58 (1.14-2.19) | 1.23 (0.90-1.69) | 1.23 (0.99-1.54) | 1.11 (0.89-1.38) | 1.05 (0.80-1.39) |
| RII (95% CI)   | 1.64 (1.09-2.49) | 1.37 (0.91-2.06) | 1.30 (0.99-1.71) | 1.11 (0.85-1.46) | 0.99 (0.71-1.39) |
| P for trend    | 0.042            |                  |                  |                  |                  |
| <b>Women</b>   |                  |                  |                  |                  |                  |
| Education (yr) |                  |                  |                  |                  |                  |
| ≥13            | 1                | 1                | 1                | 1                | 1                |
| 10-12          | 1.55 (0.93-2.61) | 1.91 (1.14-3.18) | 2.21 (1.62-3.02) | 1.69 (1.32-2.17) | 1.80 (1.30-2.47) |
| 7-9            | 2.64 (1.47-4.76) | 2.90 (1.60-5.25) | 2.50 (1.76-3.55) | 2.15 (1.58-2.92) | 2.59 (1.78-3.77) |
| ≤6             | 1.79 (0.99-3.24) | 3.18 (1.68-5.99) | 2.69 (1.91-3.80) | 2.45 (1.83-3.30) | 3.06 (2.10-4.46) |
| RII (95% CI)   | 1.48 (0.89-2.46) | 2.11 (1.21-3.69) | 1.93 (1.38-2.70) | 2.15 (1.56-2.97) | 2.91 (1.98-4.29) |
| P for trend    | 0.060            |                  |                  |                  |                  |
| Income         |                  |                  |                  |                  |                  |
| Q1(highest)    | 1                | 1                | 1                | 1                | 1                |
| Q2             | 1.48 (1.06-2.07) | 1.37 (0.92-2.05) | 0.99 (0.80-1.23) | 1.04 (0.82-1.33) | 1.44 (1.04-1.98) |
| Q3             | 1.15 (0.78-1.69) | 1.33 (0.92-1.93) | 1.25 (1.00-1.55) | 1.29 (1.01-1.65) | 2.33 (1.74-3.13) |
| Q4(lowest)     | 1.29 (0.85-1.94) | 1.50 (0.99-2.28) | 1.39 (1.11-1.76) | 1.41 (1.11-1.78) | 1.73 (1.28-2.36) |
| RII (95% CI)   | 1.22 (0.73-2.04) | 1.62 (0.97-2.71) | 1.63 (1.20-2.22) | 1.65 (1.23-2.21) | 2.32 (1.63-3.30) |
| P for trend    | 0.056            |                  |                  |                  |                  |

1  
2  
3  
4 decreased with income over the past 14 years (1.64, 1.09-2.49 in 2001; 0.99, 0.71-1.39 in  
5  
6 2014, RII, 95% CI,  $p=0.04$ ), whereas inequalities were increased with marginal significance  
7  
8 among women during the same period (1.48, 0.89-2.46 in 2001; 2.91, 1.98-4.29 in 2014, RII,  
9  
10 95% CI,  $p=0.06$ , by education; 1.22, 0.73-2.04 in 2001; 2.32, 1.63-3.30 in 2014, RII, 95% CI,  
11  
12  $p=0.056$ , by income, respectively; Table 5).

### 13 14 15 16 17 18 19 **Hypercholesterolemia**

20  
21 The age-adjusted prevalence of hypercholesterolemia among men increased with marginal  
22  
23 statistical significance. The age-adjusted prevalence of hypercholesterolemia among women  
24  
25 increased over time (Table 1). There was no significant association between SES and  
26  
27 hypercholesterolemia in either gender (Table 6).

## 28 29 30 31 32 **DISCUSSION**

33  
34 The results of this study reflect gender differences not only in the relationships between  
35  
36 major CVD risk factors and SES, but also in the linear time trends in socioeconomic  
37  
38 inequalities in major CVD risk factors among Koreans. Among men, no major CVD risk  
39  
40 factor, except for smoking showed significant associations with SES. Indeed, socioeconomic  
41  
42 inequalities for major CVD risk factors were stable over time and inequality for hypertension  
43  
44 decreased over the past 14 years. However, women with a lower SES had higher risks of  
45  
46 smoking, obesity, diabetes and hypertension than did those with a higher SES. Increasing  
47  
48 trends in socioeconomic inequalities in smoking, obesity and diabetes, especially measured  
49  
50 by income, were noted in Korean women. In contrast to the other CVD risk factors,  
51  
52 hypercholesterolemia was not associated with socioeconomic inequalities in either gender.  
53  
54  
55  
56  
57  
58  
59  
60

Table 6 Age-adjusted OR, 95% CI and RII of hypercholesterolemia by SES from 2005 to 2014

|                | KNHANES          |                  |                  |                  |
|----------------|------------------|------------------|------------------|------------------|
|                | III<br>2005      | IV<br>2007-9     | V<br>2010-12     | VI<br>2013-14    |
| <b>Men</b>     |                  |                  |                  |                  |
| Education(yr)  |                  |                  |                  |                  |
| ≥13            | 1                | 1                | 1                | 1                |
| 10-12          | 1.12 (0.68-1.82) | 1.06 (0.82-1.36) | 1.12 (0.88-1.43) | 1.08 (0.81-1.42) |
| 7-9            | 0.72 (0.29-1.79) | 1.16 (0.80-1.69) | 1.05 (0.77-1.44) | 0.91 (0.54-1.52) |
| ≤6             | 1.02 (0.55-1.91) | 0.83 (0.57-1.23) | 1.09 (0.74-1.60) | 0.92 (0.58-1.45) |
| RII (95% CI)   | 0.89 (0.42-1.87) | 1.00 (0.67-1.51) | 1.14 (0.79-1.65) | 0.93 (0.57-1.53) |
| P for trend    |                  | 0.906            |                  |                  |
| Income         |                  |                  |                  |                  |
| Q1 (highest)   | 1                | 1                | 1                | 1                |
| Q2             | 0.54 (0.29-1.01) | 0.86 (0.63-1.17) | 0.64 (0.48-0.85) | 1.15 (0.81-1.64) |
| Q3             | 0.87 (0.46-1.66) | 0.88 (0.66-1.18) | 0.97 (0.74-1.28) | 0.81 (0.56-1.18) |
| Q4 (lowest)    | 0.98 (0.54-1.78) | 1.02 (0.77-1.35) | 0.93 (0.71-1.21) | 0.85 (0.59-1.23) |
| RII (95% CI)   | 1.14 (0.48-2.72) | 1.02 (0.71-1.48) | 1.08 (0.76-1.54) | 0.72 (0.45-1.14) |
| P for trend    |                  | 0.301            |                  |                  |
| <b>Women</b>   |                  |                  |                  |                  |
| Education (yr) |                  |                  |                  |                  |
| ≥13            | 1                | 1                | 1                | 1                |
| 10-12          | 0.95 (0.47-0.91) | 0.76 (0.56-1.02) | 1.31 (0.99-1.73) | 0.84 (0.62-1.15) |
| 7-9            | 0.66 (0.30-1.44) | 0.74 (0.52-1.05) | 1.12 (0.80-1.56) | 0.95 (0.63-1.43) |
| ≤6             | 0.69 (0.31-1.57) | 0.83 (0.58-1.19) | 1.19 (0.84-1.67) | 0.95 (0.63-1.43) |
| RII (95% CI)   | 0.64 (0.27-1.53) | 0.85 (0.58-1.24) | 1.08 (0.75-1.54) | 0.85 (0.55-1.33) |
| P for trend    |                  | 0.499            |                  |                  |
| Income         |                  |                  |                  |                  |
| Q1 (highest)   | 1                | 1                | 1                | 1                |
| Q2             | 0.82 (0.47-1.44) | 0.88 (0.67-1.17) | 0.98 (0.77-1.24) | 0.79 (0.58-1.09) |
| Q3             | 0.65 (0.36-1.17) | 0.97 (0.73-1.28) | 0.93 (0.72-1.19) | 1.29 (0.95-1.75) |
| Q4 (lowest)    | 0.96 (0.59-1.54) | 1.08 (0.82-1.42) | 1.12 (0.88-1.42) | 1.02 (0.76-1.37) |
| RII (95% CI)   | 0.87 (0.44-1.70) | 1.13 (0.79-1.61) | 1.14 (0.84-1.54) | 1.24 (0.85-1.81) |
| P for trend    |                  | 0.397            |                  |                  |

1  
2  
3  
4 Socioeconomic inequalities in CVD risk factors and disease-related mortality are well known  
5  
6 in industrialised Western countries and are now being found in many developing countries as  
7  
8 well.[1-2, 18-19] However, there has been relatively little research examining time trends in  
9  
10 socioeconomic inequalities in these CVD risk factors.[6-8] To our knowledge, this is the first  
11  
12 report on trends in socioeconomic inequalities in major CVD risk factors in an Asian nation.  
13  
14

15  
16 In this study, distinct gender differences in time trend for smoking prevalence were found  
17  
18 between Korean men and women, which is consistent with trends in other Asian countries,  
19  
20 such as China and Taiwan.[20–21] Over the past 14 years, the smoking prevalence in men  
21  
22 decreased, but that among women did not change significantly. Consistent with previous  
23  
24 reports, our study showed that Koreans with a lower SES had higher smoking prevalence  
25  
26 than those with a higher SES in both gender.[22-23] However, our study further showed  
27  
28 gender differences in the time trend of smoking inequality. Based on the RII trend, the trend  
29  
30 in inequality was stable among men, but the socioeconomic gap among women widened.  
31  
32 There has been significant progress with anti-smoking policies in Korea in recent years. In  
33  
34 1995, the Health Promotion Act was enacted and restricted smoking in public buildings and  
35  
36 places. In 2004, a significant increase in taxation of tobacco products began.[24] We  
37  
38 suspected that these policies may have been effective among men in all socioeconomic  
39  
40 groups, but they were ineffective for women with lower SES.  
41  
42  
43  
44  
45

46 Over the past 14 years, the prevalence of obesity has increased in men, but it has decreased in  
47  
48 women. Among men, SES was not associated with the prevalence of obesity; however, lower  
49  
50 SES was associated with a higher prevalence of obesity in women, reflecting gender  
51  
52 differences in attitudes towards body image in Korea.[25] Men and women could have  
53  
54 different attitudes toward body weight status and may use different methods for controlling  
55  
56 body weight. As societies develop, women tend to acquire a more negative attitude towards  
57  
58  
59  
60

1  
2  
3  
4 obesity than do men. Additionally, public attitudes are more strongly negative towards obese  
5  
6 women than towards obese men. Thus, women are more likely to use their resources to  
7  
8 pursue a thinner body than are men, and women tend to shift their diet and activity patterns to  
9  
10 a healthier lifestyle more rapidly than do men.[26-27]

11  
12  
13 The prevalence of diabetes did not change in either gender during the study period. Our study  
14  
15 found gender differences in association between SES and the prevalence of diabetes, which is  
16  
17 consistent with previous studies that reported the influence of SES on the risk of diabetes was  
18  
19 more pronounced in women than in men.[19, 28-30] To our knowledge, there is no previous  
20  
21 study investigating time trends in socioeconomic inequalities for diabetes in Koreans. The  
22  
23 inequality in diabetes among women, measured by income, increased during the past 14 years,  
24  
25 which is consistent with previous studies in other countries.[31-32] Although the reasons for  
26  
27 this gender difference remain unclear, several plausible explanations that relate low SES to an  
28  
29 increased risk of diabetes in women can be proposed. Socioeconomic inequalities may cause  
30  
31 differing lifestyle behaviours, such as alcohol intake and physical activity. Women with a  
32  
33 lower SES have higher risk of harmful alcohol consumption, smoking and lack of physical  
34  
35 activity.[3, 33-34] It may also be related to less social support and poorer access to healthcare  
36  
37 services, leading to lower levels of the detection and treatment of diabetes and its associated  
38  
39 risk factors.[35] Finally, women with a lower SES may have poor eating habits, such as a less  
40  
41 intake of fruits and vegetables.[36]

42  
43  
44 During the study period, the prevalence of hypertension did not change among men, but  
45  
46 decreased among women. The pattern of associations between SES and risk of hypertension  
47  
48 differed by gender, which is consistent with a previous study.[37] The influence of low SES  
49  
50 on hypertension was more prominent and socioeconomic inequalities widened with marginal  
51  
52 statistical significance in women during study period. In contrast, the socioeconomic  
53  
54  
55  
56  
57  
58  
59  
60

1  
2  
3  
4 inequality among men was decreased, although the reason for this alleviation of inequality  
5  
6 was not clear. One possible explanation is that the marginally significant diminished  
7  
8 inequality with respect to smoking in men during the study period may mitigate the inequality.  
9

10  
11 Trends in socioeconomic inequalities in obesity and diabetes among women increased by  
12  
13 income level, but they were not significant when measured by education. Rapid social change  
14  
15 has affected the meaning of education level; for example, the proportion of women who had  
16  
17 an education level of college or above was 24% in KNHANES II (2001). However, it was  
18  
19 ~40% in KNHANES VI (2013-2014). Thus, caution is needed in comparing education  
20  
21 groups across time, especially in rapidly changing societies. Additionally, it may be better to  
22  
23 divide education levels into equal parts to investigate health inequalities.[26, 38]  
24  
25  
26  
27

28  
29 Investigating the trend of RIIs was a commonly used method to assess relative measure of  
30  
31 health inequality, but in some cases, absolute and relative measure may diverge with respect  
32  
33 to magnitude or the direction of change in health inequality.[39] Therefore, we also examined  
34  
35 the SIIs as absolute measures of inequalities for five major CVD risk factors, and found no  
36  
37 difference in trends between relative and absolute inequalities (Supplementary Table 1-5).  
38  
39

40  
41 Two strengths of our study are that study subjects were a nationally representative sample  
42  
43 and that the time trends of the relationship between SES and five major CVD risk factors  
44  
45 were examined using two SES measures (education level, household income). However,  
46  
47 several limitations also be noted. First, the study was cross-sectional in nature; thus, it was  
48  
49 difficult to determine causal relationships between SES and CVD risk factors. Second, the  
50  
51 KNHANES is a self-report survey and therefore prone to measurement error and recall bias  
52  
53 as well as heterogeneity in self-reported health. Third, the steady decline in response rates in  
54  
55 the KNHANES should not be overlooked, which could result in underestimating  
56  
57  
58  
59  
60

1  
2  
3  
4 inequalities.[40] Moreover, item responses were possibly associated with SES because there  
5  
6 were significantly different SES distributions between item responders and non-responders  
7  
8 for each of risk factor (Supplementary Tables 6-10), which may have resulted in  
9  
10 underestimation. Fourth, the generalisability of our results to whole Korean population is  
11  
12 limited since our study included only individuals aged 25-64 years, and institutionalised older  
13  
14 adults were excluded.[11] Finally, we could not examine longer-term trends in  
15  
16 socioeconomic inequalities in CVD risk factors before 2001, because, following the authors'  
17  
18 judgement, the KNHANES I (1998) survey data were excluded due to lack of reliability.  
19  
20  
21  
22  
23  
24  
25  
26  
27

## 28 **CONCLUSIONS**

29  
30 This study found that relationships between SES and major CVD risk factors (smoking,  
31  
32 obesity, diabetes, hypertension) were more prominent in Korean women than men. Health  
33  
34 inequalities, especially measured by income, for smoking, obesity and diabetes increased  
35  
36 among Korean women over the past 14 years. Public policies should be implemented to  
37  
38 prevent risk factors for CVD among Korean women with a lower SES.  
39  
40  
41  
42  
43  
44

45 **Contributors** YJK, SGK, JL and JSL developed the research questions and contributed to  
46  
47 the development of the conceptual framework, and the interpretations of the results. YJK  
48  
49 contributed to writing and submitting the manuscript. JSL performed the main analyses and  
50  
51 critical revisions to the manuscript. JP provided theoretical support and DSC, DMK, KL and  
52  
53  
54  
55  
56  
57  
58  
59  
60  
61  
62  
63  
64  
65  
66  
67  
68  
69  
70  
71  
72  
73  
74  
75  
76  
77  
78  
79  
80  
81  
82  
83  
84  
85  
86  
87  
88  
89  
90  
91  
92  
93  
94  
95  
96  
97  
98  
99  
100  
101  
102  
103  
104  
105  
106  
107  
108  
109  
110  
111  
112  
113  
114  
115  
116  
117  
118  
119  
120  
121  
122  
123  
124  
125  
126  
127  
128  
129  
130  
131  
132  
133  
134  
135  
136  
137  
138  
139  
140  
141  
142  
143  
144  
145  
146  
147  
148  
149  
150  
151  
152  
153  
154  
155  
156  
157  
158  
159  
160  
161  
162  
163  
164  
165  
166  
167  
168  
169  
170  
171  
172  
173  
174  
175  
176  
177  
178  
179  
180  
181  
182  
183  
184  
185  
186  
187  
188  
189  
190  
191  
192  
193  
194  
195  
196  
197  
198  
199  
200  
201  
202  
203  
204  
205  
206  
207  
208  
209  
210  
211  
212  
213  
214  
215  
216  
217  
218  
219  
220  
221  
222  
223  
224  
225  
226  
227  
228  
229  
230  
231  
232  
233  
234  
235  
236  
237  
238  
239  
240  
241  
242  
243  
244  
245  
246  
247  
248  
249  
250  
251  
252  
253  
254  
255  
256  
257  
258  
259  
260  
261  
262  
263  
264  
265  
266  
267  
268  
269  
270  
271  
272  
273  
274  
275  
276  
277  
278  
279  
280  
281  
282  
283  
284  
285  
286  
287  
288  
289  
290  
291  
292  
293  
294  
295  
296  
297  
298  
299  
300  
301  
302  
303  
304  
305  
306  
307  
308  
309  
310  
311  
312  
313  
314  
315  
316  
317  
318  
319  
320  
321  
322  
323  
324  
325  
326  
327  
328  
329  
330  
331  
332  
333  
334  
335  
336  
337  
338  
339  
340  
341  
342  
343  
344  
345  
346  
347  
348  
349  
350  
351  
352  
353  
354  
355  
356  
357  
358  
359  
360  
361  
362  
363  
364  
365  
366  
367  
368  
369  
370  
371  
372  
373  
374  
375  
376  
377  
378  
379  
380  
381  
382  
383  
384  
385  
386  
387  
388  
389  
390  
391  
392  
393  
394  
395  
396  
397  
398  
399  
400  
401  
402  
403  
404  
405  
406  
407  
408  
409  
410  
411  
412  
413  
414  
415  
416  
417  
418  
419  
420  
421  
422  
423  
424  
425  
426  
427  
428  
429  
430  
431  
432  
433  
434  
435  
436  
437  
438  
439  
440  
441  
442  
443  
444  
445  
446  
447  
448  
449  
450  
451  
452  
453  
454  
455  
456  
457  
458  
459  
460  
461  
462  
463  
464  
465  
466  
467  
468  
469  
470  
471  
472  
473  
474  
475  
476  
477  
478  
479  
480  
481  
482  
483  
484  
485  
486  
487  
488  
489  
490  
491  
492  
493  
494  
495  
496  
497  
498  
499  
500  
501  
502  
503  
504  
505  
506  
507  
508  
509  
510  
511  
512  
513  
514  
515  
516  
517  
518  
519  
520  
521  
522  
523  
524  
525  
526  
527  
528  
529  
530  
531  
532  
533  
534  
535  
536  
537  
538  
539  
540  
541  
542  
543  
544  
545  
546  
547  
548  
549  
550  
551  
552  
553  
554  
555  
556  
557  
558  
559  
560  
561  
562  
563  
564  
565  
566  
567  
568  
569  
570  
571  
572  
573  
574  
575  
576  
577  
578  
579  
580  
581  
582  
583  
584  
585  
586  
587  
588  
589  
590  
591  
592  
593  
594  
595  
596  
597  
598  
599  
600  
601  
602  
603  
604  
605  
606  
607  
608  
609  
610  
611  
612  
613  
614  
615  
616  
617  
618  
619  
620  
621  
622  
623  
624  
625  
626  
627  
628  
629  
630  
631  
632  
633  
634  
635  
636  
637  
638  
639  
640  
641  
642  
643  
644  
645  
646  
647  
648  
649  
650  
651  
652  
653  
654  
655  
656  
657  
658  
659  
660  
661  
662  
663  
664  
665  
666  
667  
668  
669  
670  
671  
672  
673  
674  
675  
676  
677  
678  
679  
680  
681  
682  
683  
684  
685  
686  
687  
688  
689  
690  
691  
692  
693  
694  
695  
696  
697  
698  
699  
700  
701  
702  
703  
704  
705  
706  
707  
708  
709  
710  
711  
712  
713  
714  
715  
716  
717  
718  
719  
720  
721  
722  
723  
724  
725  
726  
727  
728  
729  
730  
731  
732  
733  
734  
735  
736  
737  
738  
739  
740  
741  
742  
743  
744  
745  
746  
747  
748  
749  
750  
751  
752  
753  
754  
755  
756  
757  
758  
759  
760  
761  
762  
763  
764  
765  
766  
767  
768  
769  
770  
771  
772  
773  
774  
775  
776  
777  
778  
779  
780  
781  
782  
783  
784  
785  
786  
787  
788  
789  
790  
791  
792  
793  
794  
795  
796  
797  
798  
799  
800  
801  
802  
803  
804  
805  
806  
807  
808  
809  
810  
811  
812  
813  
814  
815  
816  
817  
818  
819  
820  
821  
822  
823  
824  
825  
826  
827  
828  
829  
830  
831  
832  
833  
834  
835  
836  
837  
838  
839  
840  
841  
842  
843  
844  
845  
846  
847  
848  
849  
850  
851  
852  
853  
854  
855  
856  
857  
858  
859  
860  
861  
862  
863  
864  
865  
866  
867  
868  
869  
870  
871  
872  
873  
874  
875  
876  
877  
878  
879  
880  
881  
882  
883  
884  
885  
886  
887  
888  
889  
890  
891  
892  
893  
894  
895  
896  
897  
898  
899  
900  
901  
902  
903  
904  
905  
906  
907  
908  
909  
910  
911  
912  
913  
914  
915  
916  
917  
918  
919  
920  
921  
922  
923  
924  
925  
926  
927  
928  
929  
930  
931  
932  
933  
934  
935  
936  
937  
938  
939  
940  
941  
942  
943  
944  
945  
946  
947  
948  
949  
950  
951  
952  
953  
954  
955  
956  
957  
958  
959  
960  
961  
962  
963  
964  
965  
966  
967  
968  
969  
970  
971  
972  
973  
974  
975  
976  
977  
978  
979  
980  
981  
982  
983  
984  
985  
986  
987  
988  
989  
990  
991  
992  
993  
994  
995  
996  
997  
998  
999  
1000



1  
2  
3  
4 **Funding** No funding  
5  
6  
7  
8

9  
10 **Competing interests** None declared.  
11  
12

13  
14  
15 **Ethical approval** All procedures and protocols of the study were approved by the  
16 Institutional Review Board of the Korea Center for Disease Control and Prevention (KCDC)  
17 since 2007. Written informed consent regarding the survey and blood analysis has been  
18 obtained from all participants since 2001.  
19  
20  
21  
22  
23

24  
25  
26  
27  
28 **Provenance and peer review** Not commissioned; externally peer reviewed.  
29  
30  
31

32  
33 **Data sharing statement** No additional data are available.  
34  
35  
36  
37  
38  
39  
40  
41  
42  
43  
44  
45  
46  
47  
48  
49  
50  
51  
52  
53  
54  
55  
56  
57  
58  
59  
60

## REFERENCES

1. Strand BH, Tverdal A. Can cardiovascular risk factors and lifestyle explain the educational inequalities in mortality from ischaemic heart disease and from other heart diseases? 26 year follow up of 50,000 Norwegian men and women. *J Epidemiol Community Health* 2004;58:705-9.
2. Mackenbach JP, Cavelaars AE, Kunst AE, *et al.* Socioeconomic inequalities in cardiovascular disease mortality; an international study. *Eur Heart J* 2000;21(14):1141-51.
3. Khang YH, Lynch JW, Jung-Choi K, *et al.* Explaining age-specific inequalities in mortality from all causes, cardiovascular disease and ischaemic heart disease among South Korean male public servants: relative and absolute perspectives. *Heart* 2008;94(1):75-82.
4. Mackenbach JP, Stirbu I, Roskam AJ, *et al.* Socioeconomic inequalities in health in 22 European countries. *N Engl J Med* 2008;358(23):2468-81.
5. Cooper R, Cutler J, Desvigne-Nickens P, *et al.* Trends and disparities in coronary heart disease, stroke, and other cardiovascular diseases in the United States: findings of the national conference on cardiovascular disease prevention. *Circulation* 2000;102:3137-47.
6. Kanjilal S, Gregg EW, Cheng YJ, *et al.* Socioeconomic status and trends in disparities in 4 major risk factors for cardiovascular disease among US adults, 1971-2002. *Arch Intern Med* 2006;166(21):2348-55.
7. Bartley M, Fitzpatrick R, Firth D, *et al.* Social distribution of cardiovascular disease risk factors: changes among men in England 1984-1993. *J Epidemiol Community Health* 2000;54(11):806-14.
8. Bennett S. Cardiovascular risk factors in Australia: trends in socioeconomic inequalities. *J*

1  
2  
3  
4 *Epidemiol Community Health* 1995;49(4):363-72.

5  
6  
7 9. National Statistical Office of Korea.

8  
9 [http://kosis.kr/statHtml/statHtml.do?orgId=101&tblId=DT\_2AS017&vw\_cd=MT\_RTITLE  
10 &list\_id=R\_SUB\_OTITLE\_OTIT\_WBTIT\_4004&seqNo=&lang\_mode=ko&language=kor  
11 &obj\_var\_id=&itm\_id=&conn\_path=E1](Accessed 31/07/2016)

12  
13  
14  
15  
16 10. Kang SW, Shin YS, Lee TJ, *et al.* A study on social polarization in Korea. Korea Institute  
17 for Health and Social Affairs; 2007 (Korean).

18  
19  
20  
21 11. Kweon S, Kim Y, Jang MJ, *et al.* Data resource profile: the Korea National Health and  
22 Nutrition Examination Survey (KNHANES). *Int J Epidemiol* 2014;43(1):69-77.

23  
24  
25  
26 12. Kim HJ, Kim Y, Cho Y, *et al.* Trends in the prevalence of major cardiovascular disease  
27 risk factors among Korean adults: results from the Korean National Health and Nutrition  
28 Examination Survey, 1998-2012. *Int J Cardiol* 2014;174(1):64-72.

29  
30  
31  
32  
33 13. Grundy SM, Pasternak R, Greenland P, *et al.* Assessment of cardiovascular risk by use of  
34 multiple-risk-factor assessment equations: a statement for healthcare professionals from the  
35 American Heart Association and the American College of Cardiology. *Circulation*  
36 1999;100(13):1481-92.

37  
38  
39  
40  
41  
42  
43 14. Steering Committee of the Western Pacific Region of the World Health Organization.  
44 The International Association for the Study of Obesity and the International Obesity Task  
45 Force. The Asia-Pacific perspective: redefining obesity and its treatment. Melbourne: Health  
46 Communications Australia Pty Ltd.; 2000:8-55.

47  
48  
49  
50 15. World Health Organization. Definition, diagnosis and classification of diabetes mellitus  
51 and its complication. Geneva: World Health Organization; 2001.

- 1  
2  
3  
4 16. U.S. Department of Health and Human Services. The seventh report of the joint National  
5  
6 Committee on Prevention, Detection, Evaluation, and Treatment of High Blood Pressure  
7  
8 (JNC-7). Bethesda, MD: National Institutes of Health; 2004.  
9  
10  
11 17. National Institutes of Health. Third report of the National Cholesterol Education Program  
12  
13 (NCEP) Expert Panel on Detection, Evaluation, and Treatment of High Blood Cholesterol in  
14  
15 Adults (Adult Treatment Panel III). Bethesda, MD: National Institutes of Health; 2002.  
16  
17  
18 18. Fateh M, Emamian MH, Asgari F, *et al.* Socioeconomic inequality in hypertension in Iran.  
19  
20 *J Hypertens* 2014;32(9):1782-8.  
21  
22  
23 19. Kim YJ, Jeon JY, Han SJ, *et al.* Effect of socio-economic status on the prevalence of  
24  
25 diabetes. *Yonsei Med J* 2015;56(3):641-7.  
26  
27  
28 20. Yang G, Fan L, Tan J, *et al.* Smoking in China: findings of the 1996 national prevalence  
29  
30 survey. *JAMA* 1999;282(13):1247-53.  
31  
32  
33 21. Wen CP, Levy DT, Cheng TY, *et al.* Smoking behaviour in Taiwan, 2001. *Tob Control*  
34  
35 2005;14 Suppl 1:i51-5.  
36  
37  
38 22. Khang YH, Cho HJ. Socioeconomic inequality in cigarette smoking: trends by gender,  
39  
40 age, and socioeconomic position in South Korea, 1989-2003. *Prev Med* 2006;42(6):415-22.  
41  
42  
43 23. Cho HJ, Song YM, Smith GD, *et al.* Trends in socio-economic differentials in cigarette  
44  
45 smoking behaviour between 1990 and 1998: a large prospective study in Korean men. *Public*  
46  
47 *Health* 2004;118(18):553-8.  
48  
49  
50 24. Kim YI, Kang KH, Lee KS, *et al.* Increase in cigarette taxation and use of national health  
51  
52 promotion fund. Ministry of Health and Welfare, Kwachon; 2003 (Korean)  
53  
54  
55 25. Yoon YS, Oh SW, Park HS. Socioeconomic status in relation to obesity and abdominal  
56  
57  
58  
59  
60

- 1  
2  
3  
4 obesity in Korean adults: A focus on sex differences. *Obesity* 2006;14(5):909-19.  
5  
6  
7 26. Wardle J, Griffith J. Socioeconomic status and weight control practices in British adults. *J*  
8  
9 *Epidemiol Community Health* 2001;55(3):185-90.  
10  
11  
12 27. Zhang Q, Wang Y. Socioeconomic inequality of obesity in the United States: do gender,  
13  
14 age, and ethnicity matter? *Soc Sci Med* 2004;58(6):1171-80.  
15  
16  
17 28. Tang M, Chen Y, Krewski D. Gender-related differences in the association between  
18  
19 socioeconomic status and self-reported diabetes. *Int J Epidemiol* 2003;32(3):381-5.  
20  
21  
22 29. Lee DS, Kim YJ, Han HR. Sex differences in the association between socio-economic  
23  
24 status and type 2 diabetes: data from the 2005 Korean National Health and Nutritional  
25  
26 Examination Survey (KNHANES). *Public Health* 2013;127(6):554-60.  
27  
28  
29 30. Kautzky-Willer A, Dorner T, Jensby A, *et al.* Women show a closer association between  
30  
31 educational level and hypertension or diabetes mellitus than males: a secondary analysis from  
32  
33 the Austrian HIS. *BMC Public Health* 2012;12:392.  
34  
35  
36 31. Espelt. A, Kunst AE, Palencia L, *et al.* Twenty years of socio-economic inequalities in  
37  
38 type 2 diabetes mellitus prevalence in Spain, 1987-2006. *Eur J Public Health*  
39  
40 2012;22(6):765-71.  
41  
42  
43 32. Imkampe AK, Gulliford MC. Increasing socio-economic inequality in type 2 diabetes  
44  
45 prevalence-repeated cross-sectional surveys in England 1994-2006. *Eur J Public Health*  
46  
47 2010;21(4):484-90.  
48  
49  
50 33. Barbeau EM, Krieger N, Soobader MJ. Working class matters: socioeconomic  
51  
52 disadvantage, race/ethnicity, gender, and smoking in NHIS 2000. *Am J Public Health*.  
53  
54 2004;94(2):269-78.  
55  
56  
57  
58  
59  
60

- 1  
2  
3  
4 34. Park SH, Kim CH, Kim DJ, *et al.* Secular trends in prevalence of alcohol use disorder and  
5  
6 its correlates in Korean adults: results from Korean National Health and Nutrition  
7  
8 Examination Survey 2005 and 2009. *Subst Abus* 2012;33(4):327-35.  
9  
10  
11 35. Korea Centers for Disease Control and Prevention, Korea Health Statistics 2012, Korea  
12  
13 National Health and Nutrition Examination Survey (KNHANESV-3), Seoul, Korea; Korea  
14  
15 Ministry of Health and Welfare; 2013.  
16  
17  
18 36. Hong SA, Kim K, Kim MK. Educational attainment and differences in fruit and vegetable  
19  
20 consumption among middle-aged adults in the Korean National Health and Nutrition  
21  
22 Examination Survey IV. *Nutr Res Pract* 2012;6(3):263-9.  
23  
24  
25  
26 37. Baek TH, Lee HY, Lim NK, *et al.* Gender differences in the association between  
27  
28 socioeconomic status and hypertension incidence: the Korean Genome and Epidemiology  
29  
30 Study (KoGES). *BMC Public Health* 2015;15:852.  
31  
32  
33 38. Kim MH, Kim MK, Choi BY, *et al.* Educational disparities in the metabolic syndrome in  
34  
35 a rapidly changing society-the case of South Korea. *Int J Epidemiol* 2005;34(6):1266-73.  
36  
37  
38 39. King NB, Harper S, Young ME. Use of relative and absolute effect measures in reporting  
39  
40 health inequalities: structured review. *BMJ* 2012;345:e5774.  
41  
42  
43 40. Kim Y. The Korea National Health and Nutrition Examination Survey (KNHANES):  
44  
45 current status and challenges. *Epidemiol Health* 2014;36:e2014002.  
46  
47  
48  
49  
50  
51  
52  
53  
54  
55  
56  
57  
58  
59  
60

## Figure legends

Fig 1. Study enrollment. The enrolled study population was from the Korean National Health and Nutrition Examination Surveys (KNHANES) 2001-2014

\*Smoking: data from the health interviews were analysed; total number of participants is 45,522.

†Diabetes and hypercholesterolemia: data from the of KNHANES III (2005) to VI (2014) were analysed; total number of participants is 37,519.

1  
2  
3  
4  
5  
6  
7  
8  
9  
10  
11  
12  
13  
14  
15  
16  
17  
18  
19  
20  
21  
22  
23  
24  
25  
26  
27  
28  
29  
30  
31  
32  
33  
34  
35  
36  
37  
38  
39  
40  
41  
42  
43  
44  
45  
46  
47  
48  
49  
50  
51  
52  
53  
54  
55  
56  
57  
58  
59  
60

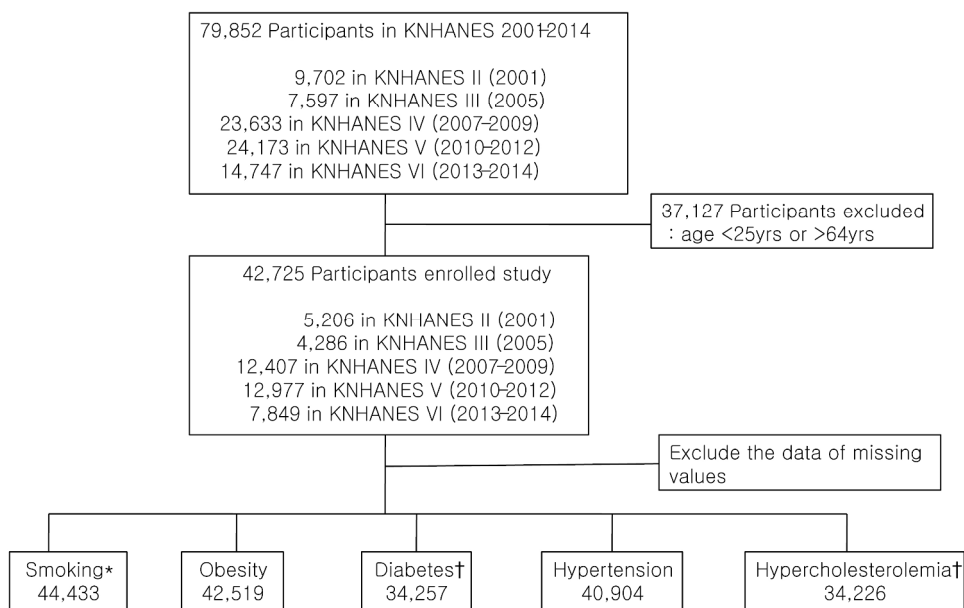

Figure 1

Fig 1. Study enrollment. The enrolled study population was from the Korean National Health and Nutrition Examination Surveys (KNHANES) 2001-2014  
The total number of participant  
254x190mm (300 x 300 DPI)



STROBE 2007 (v4)Statement—Checklist of items that should be included in reports of cross-sectional studies

| Section/Topic             | Item # | Recommendation                                                                                                                                                                       | Reported on page #   |
|---------------------------|--------|--------------------------------------------------------------------------------------------------------------------------------------------------------------------------------------|----------------------|
| Title and abstract        | 1      | (a) Indicate the study’s design with a commonly used term in the title or the abstract                                                                                               | <a href="#">1,3</a>  |
|                           |        | (b) Provide in the abstract an informative and balanced summary of what was done and what was found                                                                                  | 3                    |
| <b>Introduction</b>       |        |                                                                                                                                                                                      |                      |
| Background/rationale      | 2      | Explain the scientific background and rationale for the investigation being reported                                                                                                 | 5                    |
| Objectives                | 3      | State specific objectives, including any prespecified hypotheses                                                                                                                     | 5                    |
| <b>Methods</b>            |        |                                                                                                                                                                                      |                      |
| Study design              | 4      | Present key elements of study design early in the paper                                                                                                                              | 6                    |
| Setting                   | 5      | Describe the setting, locations, and relevant dates, including periods of recruitment, exposure, follow-up, and data collection                                                      | 6-8                  |
| Participants              | 6      | (a) Give the eligibility criteria, and the sources and methods of selection of participants                                                                                          | 6                    |
| Variables                 | 7      | Clearly define all outcomes, exposures, predictors, potential confounders, and effect modifiers. Give diagnostic criteria, if applicable                                             | 6-8                  |
| Data sources/ measurement | 8*     | For each variable of interest, give sources of data and details of methods of assessment (measurement). Describe comparability of assessment methods if there is more than one group | <a href="#">6-10</a> |
| Bias                      | 9      | Describe any efforts to address potential sources of bias                                                                                                                            | 6-8                  |
| Study size                | 10     | Explain how the study size was arrived at                                                                                                                                            | -                    |
| Quantitative variables    | 11     | Explain how quantitative variables were handled in the analyses. If applicable, describe which groupings were chosen and why                                                         | <a href="#">6-10</a> |
| Statistical methods       | 12     | (a) Describe all statistical methods, including those used to control for confounding                                                                                                | <a href="#">9-10</a> |
|                           |        | (b) Describe any methods used to examine subgroups and interactions                                                                                                                  | <a href="#">9-10</a> |
|                           |        | (c) Explain how missing data were addressed                                                                                                                                          | <a href="#">6</a>    |
|                           |        | (d) If applicable, describe analytical methods taking account of sampling strategy                                                                                                   | <a href="#">10</a>   |
|                           |        | (e) Describe any sensitivity analyses                                                                                                                                                | <a href="#">10</a>   |
| <b>Results</b>            |        |                                                                                                                                                                                      |                      |

1  
2  
3  
4  
5  
6  
7  
8  
9  
10  
11  
12  
13  
14  
15  
16  
17  
18  
19  
20  
21  
22  
23  
24  
25  
26  
27  
28  
29  
30  
31  
32  
33  
34  
35  
36  
37  
38  
39  
40  
41  
42  
43  
44  
45  
46  
47  
48  
49

|                          |     |                                                                                                                                                                                                              |                            |
|--------------------------|-----|--------------------------------------------------------------------------------------------------------------------------------------------------------------------------------------------------------------|----------------------------|
| Participants             | 13* | (a) Report numbers of individuals at each stage of study—eg numbers potentially eligible, examined for eligibility, confirmed eligible, included in the study, completing follow-up, and analysed            | <a href="#">6</a>          |
|                          |     | (b) Give reasons for non-participation at each stage                                                                                                                                                         | <a href="#">6</a>          |
|                          |     | (c) Consider use of a flow diagram                                                                                                                                                                           | <a href="#">6</a>          |
| Descriptive data         | 14* | (a) Give characteristics of study participants (eg demographic, clinical, social) and information on exposures and potential confounders                                                                     | <a href="#">11-12</a>      |
|                          |     | (b) Indicate number of participants with missing data for each variable of interest                                                                                                                          | <a href="#">6</a>          |
| Outcome data             | 15* | Report numbers of outcome events or summary measures                                                                                                                                                         | <a href="#">12</a>         |
| Main results             | 16  | (a) Give unadjusted estimates and, if applicable, confounder-adjusted estimates and their precision (eg, 95% confidence interval). Make clear which confounders were adjusted for and why they were included | 10-17                      |
|                          |     | (b) Report category boundaries when continuous variables were categorized                                                                                                                                    | <a href="#">11-20</a>      |
|                          |     | (c) If relevant, consider translating estimates of relative risk into absolute risk for a meaningful time period                                                                                             | <a href="#">23</a>         |
| Other analyses           | 17  | Report other analyses done—eg analyses of subgroups and interactions, and sensitivity analyses                                                                                                               | <a href="#">10, 11, 23</a> |
| <b>Discussion</b>        |     |                                                                                                                                                                                                              |                            |
| Key results              | 18  | Summarise key results with reference to study objectives                                                                                                                                                     | <a href="#">16-21</a>      |
| Limitations              | 19  | Discuss limitations of the study, taking into account sources of potential bias or imprecision. Discuss both direction and magnitude of any potential bias                                                   | <a href="#">24</a>         |
| Interpretation           | 20  | Give a cautious overall interpretation of results considering objectives, limitations, multiplicity of analyses, results from similar studies, and other relevant evidence                                   | <a href="#">23-24</a>      |
| Generalisability         | 21  | Discuss the generalisability (external validity) of the study results                                                                                                                                        | <a href="#">24</a>         |
| <b>Other information</b> |     |                                                                                                                                                                                                              |                            |
| Funding                  | 22  | Give the source of funding and the role of the funders for the present study and, if applicable, for the original study on which the present article is based                                                | <a href="#">25</a>         |

\*Give information separately for cases and controls in case-control studies and, if applicable, for exposed and unexposed groups in cohort and cross-sectional studies.

**Note:** An Explanation and Elaboration article discusses each checklist item and gives methodological background and published examples of transparent reporting. The STROBE checklist is best used in conjunction with this article (freely available on the Web sites of PLoS Medicine at <http://www.plosmedicine.org/>, Annals of Internal Medicine at <http://www.annals.org/>, and Epidemiology at <http://www.epidem.com/>). Information on the STROBE Initiative is available at [www.strobe-statement.org](http://www.strobe-statement.org).

Supplementary table 1. Age-adjusted prevalence (95% CI) and slope index of inequalities (SII) of smoking by SES from 2001 to 2014

|               | KNHAENS II (2001)      | KNHANES III (2005) | KNHANES IV (2007-2009) | KNHANES V (2010-2012) | KNHANES VI (2013-2014) |                 |
|---------------|------------------------|--------------------|------------------------|-----------------------|------------------------|-----------------|
| <b>Men</b>    |                        |                    |                        |                       |                        |                 |
| Education(yr) | ≥13                    | 56.6(56.6-56.7)    | 46.6(46.5-46.7)        | 42.0(41.9-42.1)       | 42.6(42.6-42.7)        | 41.9(41.9-42.0) |
|               | 10-12                  | 68.6(68.5-68.7)    | 59.2(59.2-59.3)        | 51.7(51.7-51.8)       | 53.6(53.5-53.6)        | 52.6(52.5-52.6) |
|               | 7-9                    | 67.4(67.3-67.6)    | 58.2(58.0-58.5)        | 63.6(63.4-63.8)       | 63.0(62.7-63.2)        | 44.9(44.7-45.1) |
|               | ≤6                     | 62.6(62.3-62.9)    | 51.2(50.9-51.6)        | 70.0(69.6-70.4)       | 45.8(45.6-46.1)        | 64.4(63.9-64.9) |
|               | SII                    | 9.83               | 8.98                   | 36.53                 | 13.72                  | 20.49           |
|               | P for SII trend        |                    | 0.454                  |                       |                        |                 |
| Income        | Q1 (highest)           | 57.2(57.1-57.2)    | 47.1(47.0-47.1)        | 41.2(41.1-41.2)       | 45.3(45.2-45.4)        | 42.1(42.0-42.1) |
|               | Q2                     | 62.0(61.9-62.1)    | 54.0(53.9-54.0)        | 47.9(47.8-48.0)       | 47.1(47.0-47.1)        | 47.4(47.4-47.5) |
|               | Q3                     | 67.4(67.3-67.5)    | 56.3(56.2-56.3)        | 52.0(52.0-52.1)       | 50.3(50.2-50.3)        | 48.6(48.5-48.7) |
|               | Q4 (lowest)            | 70.5(70.4-70.6)    | 62.1(62.1-62.2)        | 55.5(55.4-55.6)       | 55.1(55.0-55.1)        | 50.1(50.0-50.1) |
|               | SII                    | 17.96              | 19.08                  | 18.92                 | 12.99                  | 9.98            |
|               | P for SII linear trend |                    | 0.105                  |                       |                        |                 |
| <b>Women</b>  |                        |                    |                        |                       |                        |                 |
| Education(yr) | ≥13                    | 2.9(2.9-3.0)       | 2.5(2.4-2.5)           | 2.8(2.8-2.8)          | 4.3(4.3-4.3)           | 2.6(2.6-2.6)    |
|               | 10-12                  | 2.9(2.8-2.9)       | 6.5(6.5-6.6)           | 7.5(7.5-7.5)          | 8.8(8.8-8.9)           | 8.2(8.2-8.3)    |
|               | 7-9                    | 3.4(3.4-3.5)       | 9.2(9.0-9.3)           | 13.2(13.1-13.3)       | 26.9(26.7-27.1)        | 19.4(19.2-19.5) |
|               | ≤6                     | 2.6(2.6-2.6)       | 5.3(5.3-5.4)           | 15.2(15.0-15.4)       | 13.1(12.9-13.3)        | 15.1(14.9-15.3) |
|               | SII                    | -0.01              | 5.27                   | 16.69                 | 20.27                  | 20.55           |
|               | P for SII trend        |                    | 0.009                  |                       |                        |                 |
| Income        | Q1 (highest)           | 3.5(3.5-3.5)       | 3.5(3.5-3.5)           | 4.2(4.2-4.3)          | 4.7(4.7-4.7)           | 2.8(2.8-2.8)    |
|               | Q2                     | 2.4(2.3-2.4)       | 3.9(3.9-4.0)           | 4.1(4.1-4.1)          | 4.6(4.5-4.6)           | 4.4(4.4-4.4)    |
|               | Q3                     | 2.8(2.8-2.8)       | 5.2(5.2-5.2)           | 6.1(6.0-6.1)          | 6.8(6.8-6.8)           | 6.1(6.1-6.2)    |
|               | Q4 (lowest)            | 6.6(6.6-6.7)       | 9.0(9.0-9.1)           | 9.0(9.0-9.0)          | 10.9(10.8-10.9)        | 10.1(10.0-10.1) |
|               | SII                    | 3.82               | 7.22                   | 6.48                  | 8.39                   | 9.38            |
|               | P for SII linear trend |                    | 0.047                  |                       |                        |                 |

Supplementary table 2. Age-adjusted prevalence (95% CI) and slope index of inequalities (SII) of obesity by SES from 2001 to 2014

|                        | KNHAES II<br>(2001) | KNHANES III<br>(2005) | KNHANES IV<br>(2007-2009) | KNHANES V<br>(2010-2012) | KNHANES VI<br>(2013-2014) |
|------------------------|---------------------|-----------------------|---------------------------|--------------------------|---------------------------|
| <b>Men</b>             |                     |                       |                           |                          |                           |
| Education(yr) ≥13      | 36.4(36.3-36.5)     | 40.0(39.9-40.1)       | 41.8(41.7-41.8)           | 40.8(40.8-40.9)          | 41.4(41.3-41.4)           |
| 10-12                  | 33.1(33.0-33.1)     | 37.9(37.9-38.0)       | 39.9(39.8-39.9)           | 38.8(38.8-38.9)          | 42.1(42.0-42.1)           |
| 7-9                    | 33.2(33.1-33.3)     | 45.1(44.9-45.3)       | 41.3(41.1-41.5)           | 40.3(40.2-40.5)          | 32.9(32.8-33.1)           |
| ≤6                     | 28.6(28.4-28.7)     | 17.2(17.1-17.2)       | 41.2(41.1-41.5)           | 29.0(28.7-29.2)          | 47.6(47.2-48.0)           |
| SII                    | -8.22               | -16.56                | -0.50                     | -10.54                   | 0.08                      |
| P for SII trend        |                     |                       | 0.542                     |                          |                           |
| <b>Income</b>          |                     |                       |                           |                          |                           |
| Q1 (highest)           | 33.9(33.8-34.0)     | 42.3(42.8-42.9)       | 40.0(40.0-40.1)           | 41.7(41.6-41.8)          | 42.2(42.2-42.3)           |
| Q2                     | 35.4(35.4-35.5)     | 40.0(40.0-40.1)       | 40.5(40.4-40.6)           | 38.9(38.8-39.0)          | 39.4(39.3-39.5)           |
| Q3                     | 32.0(31.9-32.1)     | 34.2(34.1-34.2)       | 40.2(40.2-40.3)           | 40.9(40.8-40.9)          | 45.6(45.5-45.6)           |
| Q4 (lowest)            | 34.3(34.3-34.4)     | 35.4(35.4-35.5)       | 39.0(38.9-39.1)           | 34.5(34.4-34.5)          | 38.5(38.4-38.5)           |
| SII                    | -0.88               | -11.40                | -1.36                     | -7.97                    | -2.05                     |
| P for SII linear trend |                     |                       | 0.940                     |                          |                           |
| <b>Women</b>           |                     |                       |                           |                          |                           |
| Education(yr) ≥13      | 18.0(17.9-18.1)     | 19.1(18.9-19.2)       | 16.7(16.6-16.8)           | 18.9(18.9-19.0)          | 16.1(16.0-16.1)           |
| 10-12                  | 30.0(29.9-30.1)     | 28.8(28.7-28.9)       | 24.8(24.7-24.8)           | 29.9(29.9-30.0)          | 24.3(24.3-24.4)           |
| 7-9                    | 49.8(49.7-50.0)     | 35.2(35.1-35.3)       | 31.4(31.3-31.5)           | 37.0(36.8-37.1)          | 32.2(32.1-32.4)           |
| ≤6                     | 38.0(37.8-38.2)     | 34.5(34.4-34.6)       | 42.9(42.7-43.2)           | 35.1(34.9-35.3)          | 50.8(50.5-51.2)           |
| SII                    | 32.50               | 21.32                 | 31.76                     | 23.51                    | 40.66                     |
| P for SII trend        |                     |                       | 0.487                     |                          |                           |
| <b>Income</b>          |                     |                       |                           |                          |                           |
| Q1 (highest)           | 27.2(27.1-27.3)     | 23.8(23.7-23.8)       | 22.5(22.5-22.6)           | 21.6(21.6-21.7)          | 16.2(16.1-16.2)           |
| Q2                     | 30.0(29.9-30.1)     | 31.5(31.5-31.6)       | 23.5(23.5-23.6)           | 26.6(26.5-26.6)          | 24.0(24.0-24.1)           |
| Q3                     | 31.3(31.2-31.4)     | 30.9(30.8-31.0)       | 29.8(29.7-29.9)           | 29.2(29.1-29.3)          | 27.6(27.6-27.7)           |
| Q4 (lowest)            | 35.0(34.9-35.0)     | 33.1(33.0-33.1)       | 31.7(31.6-31.7)           | 33.7(33.7-33.8)          | 29.9(29.8-29.9)           |
| SII                    | 9.76                | 10.78                 | 13.43                     | 15.53                    | 17.86                     |
| P for SII linear trend |                     |                       | 0.023                     |                          |                           |

Supplementary table 3. Age-adjusted prevalence (95% CI) and slope index of inequalities (SII) of diabetes by SES from 2005 to 2014

|               |                        | KNHANES III<br>(2005) | KNHANES IV<br>(2007-2009) | KNHANES V<br>(2010-2012) | KNHANES VI<br>(2013-2014) |
|---------------|------------------------|-----------------------|---------------------------|--------------------------|---------------------------|
| <b>Men</b>    |                        |                       |                           |                          |                           |
| Education(yr) | ≥13                    | 8.1(8.1-8.1)          | 8.3(8.2-8.3)              | 7.3(7.3-7.3)             | 8.9(8.9-8.9)              |
|               | 10-12                  | 9.4(9.4-9.5)          | 8.9(8.9-8.9)              | 9.5(9.5-9.5)             | 10.3(10.3-10.4)           |
|               | 7-9                    | 11.3(11.2-11.4)       | 10.1(10.0-10.2)           | 9.1(9.0-9.1)             | 14.2(14.1-14.3)           |
|               | ≤6                     | 10.2(10.2-10.3)       | 7.6(7.6-7.7)              | 11.1(10.9-11.2)          | 9.4(9.4-9.5)              |
|               | SII                    | 3.56                  | 0.41                      | 4.13                     | 3.66                      |
|               | P for SII trend        |                       | 0.602                     |                          |                           |
| Income        | Q1 (highest)           | 10.4(10.3-10.4)       | 7.9(7.9-8.0)              | 9.3 (9.2-9.3)            | 9.5(9.5-9.6)              |
|               | Q2                     | 6.6(6.6-6.6)          | 8.6(8.6-8.6)              | 7.3(7.3-7.3)             | 8.1(8.1-8.2)              |
|               | Q3                     | 9.0(9.0-9.0)          | 7.8(7.8-7.9)              | 8.6(8.6-8.7)             | 9.8(9.8-9.8)              |
|               | Q4 (lowest)            | 10.4(10.3-10.4)       | 11.4(11.3-11.4)           | 9.8(9.7-9.8)             | 12.1(12.1-12.2)           |
|               | SII                    | 1.05                  | 3.75                      | 1.16                     | 3.83                      |
|               | P for SII linear trend |                       | 0.576                     |                          |                           |
| <b>Women</b>  |                        |                       |                           |                          |                           |
| Education(yr) | ≥13                    | 0.6(0.6-0.6)          | 2.8(2.8-2.8)              | 3.8(3.8-3.8)             | 3.9(3.8-3.9)              |
|               | 10-12                  | 5.8(5.7-5.8)          | 5.2(5.1-5.2)              | 5.5(5.5-5.5)             | 5.6(5.6-5.7)              |
|               | 7-9                    | 7.7(7.6-7.7)          | 5.3(5.3-5.4)              | 5.0(5.0-5.1)             | 7.5(7.4-7.5)              |
|               | ≤6                     | 7.2(7.1-7.2)          | 9.2(9.1-9.2)              | 8.1(8.1-8.2)             | 7.3(7.3-7.4)              |
|               | SII                    | 8.92                  | 7.00                      | 4.55                     | 5.06                      |
|               | P for SII trend        |                       | 0.048                     |                          |                           |
| Income        | Q1 (highest)           | 6.1(6.1-6.1)          | 3.9(3.9-4.0)              | 2.9(2.8-2.9)             | 4.3(4.3-4.3)              |
|               | Q2                     | 5.1(5.1-5.1)          | 4.2(4.1-4.2)              | 4.9(4.9-5.0)             | 4.6(4.6-4.6)              |
|               | Q3                     | 6.4(6.4-6.4)          | 6.7(6.7-6.7)              | 6.4(6.3-6.4)             | 5.1(5.0-5.1)              |
|               | Q4 (lowest)            | 4.4(4.1-4.4)          | 7.5(7.5-7.5)              | 6.9(6.8-6.9)             | 7.9(7.9-7.9)              |
|               | SII                    | -1.51                 | 5.26                      | 5.31                     | 4.45                      |
|               | P for SII linear trend |                       | 0.016                     |                          |                           |

Supplementary table 4. Age-adjusted prevalence (95% CI) and slope index of inequalities (SII) of hypertension by SES from 2001 to 2014

|                        | KNHANES II<br>(2001) | KNHANES III<br>(2005) | KNHANES IV<br>(2007-2009) | KNHANES V<br>(2010-2012) | KNHANES VI<br>(2013-2014) |                 |
|------------------------|----------------------|-----------------------|---------------------------|--------------------------|---------------------------|-----------------|
| <b>Men</b>             |                      |                       |                           |                          |                           |                 |
| Education(yr)          | ≥13                  | 24.9(24.8-24.9)       | 24.7(24.7-24.8)           | 22.6(22.6-22.7)          | 24.7(24.6-24.7)           | 25.3(25.2-25.3) |
|                        | 10-12                | 30.6(30.5-30.7)       | 25.9(25.8-25.9)           | 23.5(23.5-23.6)          | 27.1(27.1-27.2)           | 25.2(25.2-25.3) |
|                        | 7-9                  | 28.3(28.2-28.4)       | 27.1(27.0-27.1)           | 21.9(21.9-22.0)          | 24.9(24.8-25.0)           | 23.7(23.5-23.8) |
|                        | ≤6                   | 28.2(28.0-28.3)       | 25.0(25.0-25.1)           | 24.7(24.6-24.9)          | 29.1(28.9-29.3)           | 28.5(28.2-28.7) |
|                        | SII                  | 3.96                  | 1.52                      | 1.37                     | 3.75                      | 1.79            |
| P for SII trend        |                      |                       | 0.888                     |                          |                           |                 |
| Income                 | Q1 (highest)         | 24.3(24.2-24.3)       | 26.3(26.3-26.4)           | 21.7(21.6-21.7)          | 24.4(24.4-24.5)           | 23.6(23.5-23.6) |
|                        | Q2                   | 27.8(27.8-27.9)       | 24.9(24.8-24.9)           | 23.1(23.0-23.1)          | 27.0(27.0-27.1)           | 28.4(28.4-28.5) |
|                        | Q3                   | 26.6(26.5-26.6)       | 26.0(25.9-26.1)           | 23.5(23.4-23.5)          | 26.5(26.4-26.5)           | 25.3(25.3-25.4) |
|                        | Q4 (lowest)          | 32.1(32.1-32.2)       | 30.6(30.6-30.7)           | 25.4(25.3-25.4)          | 26.4(26.3-26.4)           | 24.8(24.7-24.8) |
|                        | SII                  | 8.71                  | 5.86                      | 4.65                     | 2.10                      | 0.15            |
| P for SII linear trend |                      |                       | 0.038                     |                          |                           |                 |
| <b>Women</b>           |                      |                       |                           |                          |                           |                 |
| Education(yr)          | ≥13                  | 11.8(11.8-11.9)       | 9.1(8.9-9.2)              | 9.2(9.2-9.3)             | 10.7(10.7-10.8)           | 9.7(9.6-9.71)   |
|                        | 10-12                | 16.7(16.7-16.8)       | 15.1(15.1-15.2)           | 15.9(15.9-16.0)          | 15.1(15.0-15.1)           | 13.0(13.0-13.0) |
|                        | 7-9                  | 22.4(22.3-22.4)       | 19.3(19.2-19.3)           | 17.7(17.6-17.7)          | 20.5(20.4-20.6)           | 19.4(19.3-19.5) |
|                        | ≤6                   | 18.8(18.7-18.8)       | 22.4(22.3-22.5)           | 19.6(19.4-19.7)          | 20.9(20.7-21.0)           | 24.3(24.1-24.4) |
|                        | SII                  | 10.78                 | 17.02                     | 13.10                    | 14.39                     | 18.80           |
| P for SII trend        |                      |                       | 0.060                     |                          |                           |                 |
| Income                 | Q1 (highest)         | 15.4(15.3-15.4)       | 14.5(14.5-14.5)           | 13.9(13.8-13.9)          | 14.1(14.1-14.2)           | 9.9(9.8-9.9)    |
|                        | Q2                   | 20.0(20.0-20.1)       | 17.7(17.6-17.7)           | 13.7(13.7-13.8)          | 14.5(14.5-14.6)           | 13.3(13.2-13.3) |
|                        | Q3                   | 17.6(17.5-17.6)       | 17.4(17.4-17.5)           | 16.3(16.3-16.4)          | 17.1(17.0-17.1)           | 18.4(18.4-18.5) |
|                        | Q4 (lowest)          | 18.0(17.9-18.1)       | 18.5(18.4-18.5)           | 17.6(17.5-17.6)          | 18.2(18.1-18.2)           | 15.4(15.3-15.4) |
|                        | SII                  | 2.21                  | 4.62                      | 5.48                     | 5.82                      | 8.71            |
| P for SII linear trend |                      |                       | 0.057                     |                          |                           |                 |

Supplementary table 5. Age-adjusted prevalence (95% CI) and slope index of inequalities (SII) of hypercholesterolemia by SES from 2005 to 2014

|               | KNHANES III<br>(2005) | KNHANES IV<br>(2007-2009) | KNHANES V<br>(2010-2012) | KNHANES VI<br>(2013-2014) |                 |
|---------------|-----------------------|---------------------------|--------------------------|---------------------------|-----------------|
| <b>Men</b>    |                       |                           |                          |                           |                 |
| Education(yr) | ≥13                   | 7.1(7.1-7.1)              | 9.7(9.6-9.7)             | 11.2(11.2-11.3)           | 12.0(12.0-12.2) |
|               | 10-12                 | 8.2(8.2-8.2)              | 9.5(9.5-9.6)             | 12.4(12.4-12.4)           | 13.3(13.2-13.3) |
|               | 7-9                   | 4.3(4.2-4.3)              | 10.3(10.2-10.3)          | 9.8(9.8-9.9)              | 16.9(16.8-17.1) |
|               | ≤6                    | 7.6(7.6-7.7)              | 8.9(8.8-9.0)             | 8.9(8.9-9.0)              | 12.2(12.0-12.4) |
|               | SII                   | -1.40                     | -0.28                    | -3.02                     | 2.80            |
|               |                       |                           | 0.378                    |                           |                 |
| Income        | Q1 (highest)          | 8.0(8.0-8.1)              | 9.9(9.9-9.9)             | 13.1(13.0-13.1)           | 13.6(13.6-13.7) |
|               | Q2                    | 4.8(4.8-4.9)              | 8.7(8.6-8.7)             | 8.9(8.9-8.9)              | 14.7(14.6-14.7) |
|               | Q3                    | 7.6(7.6-7.7)              | 8.8(8.7-8.8)             | 12.9(12.9-12.9)           | 10.9(10.9-11.0) |
|               | Q4 (lowest)           | 8.9(8.9-9.0)              | 10.2(10.1-10.2)          | 12.4(12.4-12.5)           | 11.5(11.4-11.5) |
|               | SII                   | 2.27                      | 0.34                     | 0.86                      | -4.08           |
|               |                       |                           | 0.085                    |                           |                 |
| <b>Women</b>  |                       |                           |                          |                           |                 |
| Education(yr) | ≥13                   | 13.5(13.3-13.6)           | 13.1(13.0-13.2)          | 12.2(12.2-12.3)           | 12.4(12.3-12.4) |
|               | 10-12                 | 8.4(8.3-8.4)              | 9.7(9.7-9.8)             | 13.7(13.7-13.8)           | 11.0(11.0-11.0) |
|               | 7-9                   | 7.1(7.0-7.1)              | 10.3(10.3-10.4)          | 11.2(11.1-11.2)           | 9.8(9.7-9.8)    |
|               | ≤6                    | 5.2(5.1-5.2)              | 11.9(11.8-11.9)          | 9.8(9.8-9.9)              | 10.4(10.3-10.4) |
|               | SII                   | -10.25                    | -1.89                    | -3.27                     | -3.20           |
|               |                       |                           | 0.177                    |                           |                 |
| Income        | Q1 (highest)          | 8.0(7.9-8.0)              | 10.2(10.2-10.3)          | 12.4(12.4-12.5)           | 11.8(11.8-11.9) |
|               | Q2                    | 7.4(7.4-7.4)              | 9.2(9.2-9.3)             | 12.2(12.1-12.2)           | 9.8(9.8-9.8)    |
|               | Q3                    | 5.6(5.5-5.6)              | 10.0(10.0-10.0)          | 11.7(11.7-11.8)           | 14.2(14.2-14.3) |
|               | Q4 (lowest)           | 7.6(7.6-7.7)              | 10.9(10.9-10.9)          | 13.8(13.8-13.8)           | 11.7(11.6-11.7) |
|               | SII                   | -1.08                     | 1.08                     | 1.49                      | 1.58            |
|               |                       |                           | 0.535                    |                           |                 |

Supplementary table 6. Comparing difference of SES distribution between responder and non-responder (smoking)

|               |              | Response<br>(n=44433, 98%) |         | Non-response<br>(n=1089, 2%) |         |
|---------------|--------------|----------------------------|---------|------------------------------|---------|
| Education(yr) | ≥13          | 15438                      | (36%)   | 36                           | (27.3%) |
|               | 10-12        | 16815                      | (38.1%) | 49                           | (37.1%) |
|               | 7-9          | 5272                       | (12.0%) | 19                           | (14.4%) |
|               | ≤6           | 6583                       | (14.9%) | 28                           | (21.2%) |
| p-value*      |              |                            |         | 0.093                        |         |
| Income        | Q1 (highest) | 11112                      | (25.5%) | 198                          | (19.5%) |
|               | Q2           | 11032                      | (25.3%) | 235                          | (23.1%) |
|               | Q3           | 10915                      | (25.0%) | 243                          | (23.9%) |
|               | Q4 (lowest)  | 10576                      | (24.2%) | 340                          | (33.5%) |
| p-value*      |              |                            |         | <0.0001                      |         |

\*p-value for chi-square test

(We analyzed the data of health interview for smoking behavior, total number is 45,522)

Supplementary table 7. Comparing difference of SES distribution between responder and non-responder (obesity)

|               |              | Response<br>(n=42519, 99%) |         | Non-response<br>(n=206, 1%) |         |
|---------------|--------------|----------------------------|---------|-----------------------------|---------|
| Education(yr) | ≥13          | 14399                      | (34.9%) | 47                          | (31.1%) |
|               | 10-12        | 15621                      | (37.8%) | 63                          | (41.7%) |
|               | 7-9          | 4972                       | (12.0%) | 26                          | (17.2%) |
|               | ≤6           | 6284                       | (15.2%) | 15                          | (9.9%)  |
| p-value*      |              |                            |         | 0.063                       |         |
| Income        | Q1 (highest) | 10535                      | (25.3%) | 31                          | (16.2%) |
|               | Q2           | 10516                      | (25.2%) | 44                          | (23.0%) |
|               | Q3           | 10453                      | (25.1%) | 51                          | (26.7%) |
|               | Q4 (lowest)  | 10218                      | (24.5%) | 65                          | (34.0%) |
| p-value*      |              |                            |         | 0.003                       |         |

\* p-value for chi-square test



Supplementary table 8. Comparing difference of SES distribution between responder and non-responder (diabetes)

|               |              | Response<br>(n=34257, 92%) |         | Non-response<br>(n=3262, 8%) |         |
|---------------|--------------|----------------------------|---------|------------------------------|---------|
| Education(yr) | ≥ 13         | 12308                      | (36.0%) | 670                          | (32.8%) |
|               | 10-12        | 12810                      | (37.5%) | 752                          | (36.8%) |
|               | 7-9          | 3975                       | (11.6%) | 258                          | (12.6%) |
|               | ≤ 6          | 5095                       | (14.9%) | 363                          | (17.8%) |
| p-value*      |              |                            |         | 0.001                        |         |
| Income        | Q1 (highest) | 8652                       | (25.5%) | 655                          | (21.0%) |
|               | Q2           | 8561                       | (25.3%) | 700                          | (22.4%) |
|               | Q3           | 8517                       | (25.1%) | 782                          | (25.0%) |
|               | Q4 (lowest)  | 8148                       | (24.1%) | 988                          | (31.6%) |
| p-value*      |              |                            |         | <0.001                       |         |

\*p-value for chi-square test

(We analyzed only the data of KNHANES III (2005) to VI (2014) for diabetes, total number is 37,519)

Supplementary table 9. Comparing difference of SES distribution between responder and non-responder (hypertension)

|               |              | Response<br>(n=40904, 96%) |         | Non-response<br>(n=1821, 4%) |         |
|---------------|--------------|----------------------------|---------|------------------------------|---------|
| Education(yr) | ≥ 13         | 14265                      | (35.0%) | 181                          | (29.4%) |
|               | 10-12        | 15430                      | (37.8%) | 254                          | (41.3%) |
|               | 7-9          | 4908                       | (12.0%) | 90                           | (14.6%) |
|               | ≤ 6          | 6209                       | (15.2%) | 90                           | (14.6%) |
| p-value*      |              |                            |         | 0.013                        |         |
| Income        | Q1 (highest) | 10176                      | (25.3%) | 390                          | (23.0%) |
|               | Q2           | 10149                      | (25.2%) | 411                          | (24.2%) |
|               | Q3           | 10102                      | (25.1%) | 402                          | (23.7%) |
|               | Q4 (lowest)  | 9788                       | (24.3%) | 495                          | (29.2%) |
| p-value*      |              |                            |         | <0.001                       |         |

\*p-value for chi-square test

Supplementary table 10. Comparing difference of SES distribution between responder and non-responder (hypercholesterolemia)

|               |              | Response<br>(n=34226, 91%) |         | Non-response<br>(n=3293, 9%) |         |
|---------------|--------------|----------------------------|---------|------------------------------|---------|
| Education(yr) | ≥13          | 12298                      | (36.0%) | 680                          | (32.8%) |
|               | 10-12        | 12794                      | (37.5%) | 768                          | (37.0%) |
|               | 7-9          | 3972                       | (11.6%) | 261                          | (12.6%) |
|               | ≤6           | 5093                       | (14.9%) | 365                          | (17.6%) |
| p-value*      |              |                            |         |                              |         |
| Income        | Q1 (highest) | 8645                       | (25.5%) | 662                          | (21.0%) |
|               | Q2           | 8552                       | (25.3%) | 709                          | (22.5%) |
|               | Q3           | 8508                       | (25.1%) | 791                          | (25.1%) |
|               | Q4 (lowest)  | 8142                       | (24.1%) | 994                          | (31.5%) |
| p-value*      |              |                            |         |                              |         |

\*p-value for chi-square test

(We analyzed only the data of KNHANES III (2005) to VI (2014) for hypercholesterolemia, total number is 37,519)

# BMJ Open

## Trends in socioeconomic inequalities in five major risk factors for cardiovascular disease in the Korean population: a cross sectional study using data from the Korea National Health and Nutrition Examination Survey, 2001-2014

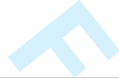

|                                 |                                                                                                                                                                                                                                                                                                                                                                                                                                                                                                                                                                                                                                                                                                                                                                                                                                                                                                   |
|---------------------------------|---------------------------------------------------------------------------------------------------------------------------------------------------------------------------------------------------------------------------------------------------------------------------------------------------------------------------------------------------------------------------------------------------------------------------------------------------------------------------------------------------------------------------------------------------------------------------------------------------------------------------------------------------------------------------------------------------------------------------------------------------------------------------------------------------------------------------------------------------------------------------------------------------|
| Journal:                        | <i>BMJ Open</i>                                                                                                                                                                                                                                                                                                                                                                                                                                                                                                                                                                                                                                                                                                                                                                                                                                                                                   |
| Manuscript ID                   | bmjopen-2016-014070.R3                                                                                                                                                                                                                                                                                                                                                                                                                                                                                                                                                                                                                                                                                                                                                                                                                                                                            |
| Article Type:                   | Research                                                                                                                                                                                                                                                                                                                                                                                                                                                                                                                                                                                                                                                                                                                                                                                                                                                                                          |
| Date Submitted by the Author:   | 17-Feb-2017                                                                                                                                                                                                                                                                                                                                                                                                                                                                                                                                                                                                                                                                                                                                                                                                                                                                                       |
| Complete List of Authors:       | Kim, Yoon Jung; Hangang Sacred Heart Hospital, Hallym University Medical Center<br>Lee, Ji Sung; Asan Medical Center, University of Ulsan College of Medicine, Clinical Research Center<br>Park, Juri; Hallym University Kangdong Sacred Heart Hospital, Division of Endocrinology and Metabolism, Department of Internal Medicine<br>Choi, Dong Seop; Korea University College of Medicine, Department of Internal Medicine<br>Kim, Doo Man; Hallym University Kangdong Sacred Heart Hospital, Division of Endocrinology and Metabolism, Department of Internal Medicine<br>Lee, Kee-Hyoung ; Korea University College of Medicine, Pediatrics<br>Kim, Ho Yeon ; Inha University Hospital, Department of Obstetrics and Gynecology<br>Kim, Sin Gon; Korea University College of Medicine, Department of Internal Medicine<br>Lee, Juneyoung; Korea University College of Medicine, Biostatistics |
| <b>Primary Subject Heading</b>: | Epidemiology                                                                                                                                                                                                                                                                                                                                                                                                                                                                                                                                                                                                                                                                                                                                                                                                                                                                                      |
| Secondary Subject Heading:      | Cardiovascular medicine, Health policy, Public health                                                                                                                                                                                                                                                                                                                                                                                                                                                                                                                                                                                                                                                                                                                                                                                                                                             |
| Keywords:                       | Health inequality, cardiovascular disease, trend, cardiovascular disease risk factors                                                                                                                                                                                                                                                                                                                                                                                                                                                                                                                                                                                                                                                                                                                                                                                                             |
|                                 |                                                                                                                                                                                                                                                                                                                                                                                                                                                                                                                                                                                                                                                                                                                                                                                                                                                                                                   |

SCHOLARONE™  
Manuscripts

1  
2  
3  
4 **Trends in socioeconomic inequalities in five major risk factors for**  
5 **cardiovascular disease in the Korean population: a cross sectional study**  
6 **using data from the Korea National Health and Nutrition Examination**  
7 **Survey, 2001-2014**  
8  
9  
10  
11  
12  
13

14 Yoon Jung Kim<sup>1\*</sup>, Ji Sung Lee<sup>2\*</sup>, Juri Park<sup>3</sup>, Dong Seop Choi<sup>4</sup>, Doo Man Kim<sup>3</sup>, Kee-Hyoung  
15 Lee<sup>5</sup>, Ho Yeon Kim<sup>6</sup>, Sin Gon Kim<sup>4†</sup>, Juneyoung Lee<sup>7†</sup>  
16  
17  
18  
19

20  
21  
22 YJK\* and JSL\* contributed equally to this study.  
23

24  
25 SGK<sup>†</sup> and JL<sup>†</sup> contributed equally to this study.  
26  
27  
28  
29

30 <sup>1</sup>Division of Endocrinology and Metabolism, Department of Internal Medicine, Hangang  
31 Sacred Heart Hospital, Hallym University Medical Center, Seoul, Korea  
32  
33

34  
35 <sup>2</sup>Clinical Research Center, Asan Medical Center, University of Ulsan College of Medicine,  
36 Seoul, Korea  
37  
38  
39

40 <sup>3</sup>Division of Endocrinology and Metabolism, Department of Internal Medicine, Kangdong  
41 Sacred Heart Hospital, Hallym University Medical Center, Seoul, Korea  
42  
43  
44

45 <sup>4</sup>Division of Endocrinology and Metabolism, Department of Internal Medicine, Korea  
46 University College of Medicine, Seoul, Korea  
47  
48  
49

50 <sup>5</sup>Department of Pediatrics, Korea University College of Medicine, Seoul, Korea  
51  
52

53 <sup>6</sup>Department of Obstetrics and Gynecology, Inha University Hospital, Incheon, Korea  
54  
55

56 <sup>7</sup>Department of Biostatistics, Korea University College of Medicine, Seoul, Korea  
57  
58  
59  
60

1  
2  
3  
4  
5  
6  
7 **Correspondence to:** Juneyoung Lee, PhD  
8

9  
10 Department of Biostatistics, Korea University College of Medicine, Anam-dong 5-ga,  
11  
12 Seongbuk-gu, Seoul 136-701, Korea  
13

14  
15 Tel: 82-2-920-6436; Fax: 82-2-953-6439; E-mail: jyleeuf@korea.ac.kr  
16  
17

18  
19  
20  
21 Word count: 3499  
22  
23  
24  
25  
26  
27  
28  
29  
30  
31  
32  
33  
34  
35  
36  
37  
38  
39  
40  
41  
42  
43  
44  
45  
46  
47  
48  
49  
50  
51  
52  
53  
54  
55  
56  
57  
58  
59  
60

## ABSTRACT

**Objectives:** To examine trends in socioeconomic inequalities in major cardiovascular disease (CVD) risk factors among the Korean population

**Design:** Cross-sectional study

**Setting:** A nationally representative population survey database

**Participants:** A total of 42,725 Koreans, aged 25-64 years, who participated in the Korean National Health and Nutrition Examination Survey (KNHANES) II (2001) to VI (2013-2014)

**Main outcome measures:** Trends in socioeconomic inequalities in five major CVD risk factors (smoking, obesity, diabetes, hypertension, hypercholesterolemia)

**Results** Gender differences were noted in the time trends in socioeconomic inequalities in smoking, obesity, diabetes and hypertension. Among men, low socioeconomic status (SES) was associated with higher prevalence of smoking, but not with obesity, diabetes or hypertension. The magnitudes of socioeconomic inequalities in smoking, obesity and diabetes remained unchanged, and the magnitude of the inequality in hypertension decreased over time. However, among women, low SES was associated with higher prevalence of smoking, obesity, diabetes and hypertension. Time trends towards increasing socioeconomic inequalities, measured by income, in smoking, obesity and diabetes were found in women. Unlike the other CVD risk factors, hypercholesterolemia was not associated with socioeconomic inequality.

**Conclusions** SES had a stronger impact on major CVD risk factors among Korean women than men. Moreover, socioeconomic inequalities in smoking, obesity and diabetes worsened among Korean women over time. Public policies to prevent smoking, obesity and diabetes in

women with lower SES are needed to address inequalities.

Keywords: trend, health inequality, cardiovascular disease, cardiovascular disease risk factors

### **Strengths and limitations of the study**

- The strength of this study is that a nationally representative sample was used as the study population.
- The limitation of this study is that a period longer than 14 years could not be used for the investigation of socioeconomic inequalities, as data from KNHANES I (1998) were excluded due to a lack of reliability and there was no available nationally representative data before 1998.
- The steady decline of response rates in the KNHANES could result in underestimation of inequalities.

## INTRODUCTION

Socioeconomic status (SES) has shown inverse associations with cardiovascular disease (CVD) in most industrialised Western countries, such that disadvantaged groups experience higher risks for CVD.[1-2] A considerable portion of the association between SES and CVD has been attributed to the combined effects of inequalities in health-related behaviours, environmental conditions, social structures and contact with and delivery of healthcare services.[3] As CVD mortality and morbidity contribute sizeable proportions to overall health inequality, attempts to reduce these causes of death are public health concerns.[4] Previous studies have shown that a greater decline in the prevalence of CVD risk factors among higher SES groups widened the gap among SES groups over time in the US.[5-6] However, studies in England and Australia failed to provide strong evidence that socioeconomic inequalities in CVD risk factors had increased in recent decades.[7-8]

Korea, a recently developed country, has experienced rapid socioeconomic growth. The per capita gross national income has increased 2.5-fold over the past 14 years (from \$11,000 US in 2001 to \$27,000 US in 2014), but the gap in socioeconomic circumstances has widened during this period.[9-10] Thus, it remains unclear whether the increased overall wealth has improved the health status of all segments of the population.

To our knowledge, no previous study has examined time trends in socioeconomic inequalities with regard to major CVD risk factors in Koreans. The purpose of this study was to examine recent national trends in socioeconomic inequalities in five major CVD risk factors (smoking, obesity, diabetes, hypertension, hypercholesterolemia) using national survey data by gender.



## METHODS

### Study participants

This study was based on data from five consecutive Korean National Health and Nutrition Examination Surveys (KNHANES) conducted from 2001 to 2014. The KNHANES is a national survey that assesses the general health and nutritional status of the Korean population. A detailed description of the survey design and data collection in the KNHANES has been published before.[11] The KNHANES was initiated in 1998 but we excluded the data from KNHANES I (1998) due to a lack of reliability.[12] The response rates were 92.3%, 99.1%, 78.4%, 80.8%, and 78.6% for KNHANES II, III, IV, V, and VI, respectively. In this study, the study population was limited to adults aged 25-64 years to examine trends in socioeconomic inequalities. Considering the applicability of SES (income and education), we excluded survey participants aged younger than 25 years who may not have completed their education or have no job and those older than 64 years who were mostly economically inactive. For the four CVD risk factors (obesity, diabetes, hypertension and hypercholesterolemia), total number of participants in the analysis was 42,725, which included 5,206 participants from the KNHANES II (2001), 4,286 participants from the KNHANES III (2005), 12,407 participants from the KNHANES IV (2007-2009), 12,977 participants from the KNHANES V (2010-2012), and 7,849 participants from the KNHANES VI (2013-2014) (Fig. 1). The total number of participants including in the smoking analysis was 45,522, which is, different from the number included in the analysis of other risk factors because health interview data, instead of health examination data, were used to determine subjects' smoking status. We composed the five data sets for each CVD risk factor individually, excluding the data with missing values for each CVD risk factor.

### **Health interview and health examination survey**

The KNHANES consists of three components: a health interview, a health examination, and a nutrition survey. The health interview survey collects detailed information on SES (e.g. education level, household income), smoking and drinking behaviours, and healthcare utilisation. Prior diagnosis of diabetes and hypertension by a physician and current use of anti-hypertensive and anti-hyperglycaemic agents are included in the questionnaire (for example, for treatment of diabetes, “what is your treatment for diabetes mellitus?”, with the following answer categories: insulin, oral hypoglycemic agents or lifestyle modification.) Height to the nearest 0.1 cm was measured using portable stadiometers. Weight to the nearest 0.1 kg was measured using a portable electronic scale. According to the standard protocol, systolic blood pressure (SBP) and diastolic blood pressure (DBP) were measured by trained nurses using a mercury sphygmomanometer (Baumanometer Desk model; Baum, NY, USA) on the right arm of the subject while sitting after at least 5 min of rest.

### **Blood sample collection and biochemical analysis**

Venous blood samples were obtained from each participant in the morning after fasting for at least 8 h. All samples were processed according to the protocols of KNHANES. After blood collection, an 8 mL serum separating tube for analysing blood lipid level was kept at room temperature for 30 min, and the blood was subsequently centrifuged (3000 rpm, 15 min). A 2 mL sodium fluoride tube for analysing glucose levels was mixed in a roller mixer for 10 min. All blood samples were refrigerated at 2-8°C and then transported to the central laboratory. Within 24 h of blood collection, plasma concentrations of glucose and lipid were assayed

1  
2  
3  
4 using an Advia 1650 (Siemens, NY, USA) in 2005 and 2007 and using a Hitachi Automatic  
5  
6 Analyzer 7600 (Hitachi, Tokyo, Japan) since 2008. Since 2005, all laboratory analyses were  
7  
8 performed according to the protocol and monitored to ensure the values met acceptable  
9  
10 standards of precision and reproducibility in a central laboratory. Because quality control for  
11  
12 the biochemical analysis of blood was started in 2005, we analysed the data of serum glucose  
13  
14 and total cholesterol that were collected since 2005 in this study.  
15  
16  
17  
18  
19

### 20 21 **SES indicators**

22  
23 Education level and income were used as SES indicators. Education level was grouped into  
24  
25 four categories: college or higher ( $\geq 13$  years), high school (10-12 years), middle school (7-9  
26  
27 years), elementary school or less ( $\leq 6$  years). The measure of income was equivalised gross  
28  
29 household income per month, defined as total household income divided by the square root of  
30  
31 the number of household members to adjust for the effect of the number of individuals in the  
32  
33 household. We divided study subjects into four groups according to quartiles of equivalised  
34  
35 household income by gender and age (Q1-Q4; Q1, highest quartile; Q4, lowest quartile).  
36  
37  
38  
39  
40  
41  
42  
43

### 44 **Definition of CVD risk factors**

45  
46 Smoking, obesity, diabetes, hypertension and hypercholesterolemia were examined because  
47  
48 these are major independent risk factors for CVD.[13] Cigarette smoking was defined as a  
49  
50 “yes” answer to both of the following questions: “Have you smoked at least 100 cigarettes in  
51  
52 your entire life?” and “Do you smoke cigarettes now?” Body mass index (BMI) was  
53  
54 calculated as the ratio of weight to height squared ( $\text{kg}/\text{m}^2$ ). Obesity was defined as a BMI of  
55  
56  $\geq 25 \text{ kg}/\text{m}^2$ , according to the re-defined criteria of the World Health Organization for obesity  
57  
58  
59  
60

1  
2  
3  
4 in the Asia-Pacific region.[14] Based on the criteria of the World Health Organization,  
5  
6 diabetes was defined as fasting plasma glucose of  $\geq 126$  mg/dL, a previous diagnosis of  
7  
8 diabetes by a physician, or current use of anti-hyperglycaemic agents or insulin.[15]  
9  
10 According to the criteria of the 7<sup>th</sup> Report of the Joint National Committee, hypertension was  
11  
12 defined as an average SBP and/or DBP  $\geq 140/90$  mmHg or the use of anti-hypertensive  
13  
14 agents.[16] According to the guidelines for cholesterol of the NCEP ATP III,  
15  
16 hypercholesterolemia was defined as a plasma total cholesterol of  $\geq 240$  mg/dL or current use  
17  
18 of cholesterol-lowering agents.[17]  
19  
20  
21  
22  
23  
24

### 25 **Statistical analysis**

26  
27  
28 The demographic characteristics of the study participants are presented as the means  $\pm$   
29  
30 standard errors (SE) or age-adjusted prevalence (SE). Comparisons of the characteristics  
31  
32 across survey periods were performed using analysis of variance (ANOVA) or  $\chi^2$  test, as  
33  
34 appropriate, and  $\chi^2$  linear trend test was also used. To adjust differences in results from  
35  
36 changes in age structure of each survey, age-adjusted prevalence was calculated using a direct  
37  
38 standardization method based on 2010 Korea Census.  
39  
40  
41

42 The relative index of inequality (RII), a measure of effect that permits meaningful  
43  
44 comparisons of socioeconomic health inequalities over survey periods was computed. The  
45  
46 RII enables direct comparisons between SES variables with regard to the proportions of the  
47  
48 population in different categories. To obtain the RII for each indicator of SES, a score  
49  
50 between 0 (for the highest SES) and 1 (for the lowest SES) was assigned to each category  
51  
52 based on the proportion of subjects above the midpoint in the category. For example, if 10%  
53  
54 of the subjects were in the highest educational category, participants in the group were  
55  
56  
57  
58  
59  
60

1  
2  
3  
4 represented by the range 0-0.1 and given a score of 0.05 (half of 0.1). If 20% of the  
5  
6  
7 population were in the next group, participants in the group were given a score of 0.2 (0.1  
8  
9 plus 0.2/2). The RII was obtained by regressing the outcome on each of the SES scores and  
10  
11 was directly interpretable for each SES indicator used to compare participants with lowest  
12  
13 SES (1) with those with the highest SES (0). In this study, the RII of major CVD risk factors  
14  
15 is presented using the odds ratio and 95% confidence interval computed from binary logistic  
16  
17 regression analysis adjusted for age. Trends in the RII were examined by estimating the p  
18  
19 value for an interaction term of SES indicator and the variables that identified the year of the  
20  
21 data in the model. Survey year was entered into the model as a numerical value (e.g., 2001  
22  
23 for KNHANES II). We also calculated a slope index of inequality (SII) for each risk factor in  
24  
25 each survey. The SII was measured using the regression coefficient (slope) for the linear  
26  
27 relationship between the prevalence of a CVD risk factor in a socioeconomic category in the  
28  
29 overall distribution of the SES, and relative rank of that category in the overall distribution of  
30  
31 the SES. The regression coefficient can be interpreted as the absolute difference in prevalence  
32  
33 across the entire SES distribution. In addition, we investigated gender and SES association in  
34  
35 an interaction model to examine whether there was a significant difference between the  
36  
37 trends in men and women.  
38  
39  
40  
41  
42

43 As data from KNHANES were derived from stratified and multi-stage clustered probability  
44  
45 sampling methods to represent the entire South Korean population, population weightings  
46  
47 were also applied in the analyses. The PROC SURVEY procedure was used to apply  
48  
49 stratification, primary sampling units and population weights. Significance levels were set at  
50  
51 a two tailed p-value <0.05. All analyses were conducted using the SAS software version 9.4  
52  
53 (SAS Institute, Cary, NC).  
54  
55  
56  
57  
58  
59  
60

## RESULTS

The general characteristics of participants in the KNHANES II (2001) to VI (2013-2014) are shown in Table 1. The mean age of participants increased over time ( $41.2 \pm 0.2$  to  $43.8 \pm 0.2$  years and  $41.6 \pm 0.2$  to  $44.2 \pm 0.2$  years for men and women, respectively). The proportion of participants with college or higher education ( $\geq 13$  years) increased gradually, from 39% to 47% for men and from 24% to 39% for women from 2001 to 2014. There were significant interaction effects between gender and SES on RII except for hypercholesterolemia. The p-values for gender by education interaction were  $<0.001$ ,  $<0.001$ ,  $<0.001$ ,  $<0.001$  and 0.768 for smoking, obesity, diabetes, hypertension and hypercholesterolemia, respectively, while those for the interaction of gender by income were  $<0.001$ ,  $<0.001$ , 0.033, 0.048 and 0.302, respectively. Therefore, we examined the trends in socioeconomic inequalities for major CVD risk factors by gender.

### Smoking

Over the past 14 years, the age-adjusted smoking prevalence decreased significantly, from 64% to 47% in men, but it did not change in women (Table 1). Low SES was associated with a high prevalence of smoking in both genders (Table 2). Among Korean men, time trends in socioeconomic inequalities in smoking prevalence by education and income levels were generally stable during 2001-2014. In contrast, a significantly increasing trend in socioeconomic inequalities with regard to smoking prevalence was noted among women (Table 2).

Table 1 General characteristics of the study population (25-64 years) from 2001 to 2014

|                      | KNHANES*    |             |              |              |               | P-value† |
|----------------------|-------------|-------------|--------------|--------------|---------------|----------|
|                      | II<br>2001  | III<br>2005 | IV<br>2007-9 | V<br>2010-12 | VI<br>2013-14 |          |
| <b>Men</b>           |             |             |              |              |               |          |
| n                    | 3164        | 2868        | 5318         | 5501         | 3315          |          |
| Age                  | 41.2±0.2    | 41.1±0.3    | 42.4±0.2     | 43.1±0.2     | 43.8±0.2      | <0.001   |
| BMI                  | 23.9±0.1    | 24.2±0.1    | 24.3±0.1     | 24.3±0.1     | 24.6±0.1      | <0.001   |
| Education (yr)       |             |             |              |              |               | <0.001   |
| ≤6                   | 9.4 (0.8)   | 8.3 (0.6)   | 9.6 (0.5)    | 8.3 (0.5)    | 7.2 (0.6)     |          |
| 7-9                  | 12.1 (0.7)  | 10.0 (0.7)  | 10.5 (0.5)   | 10.1 (0.5)   | 8.8 (0.6)     |          |
| 10-12                | 39.8 (1.2)  | 42.4 (1.2)  | 39.4 (0.9)   | 38.6 (0.8)   | 36.9 (1.1)    |          |
| ≥13                  | 38.7 (1.6)  | 39.2 (1.4)  | 40.5 (1.0)   | 43.0 (0.9)   | 47.1 (1.2)    |          |
| Income‡              |             |             |              |              |               | 0.234    |
| Q1(highest)          | 22.3 (1.3)  | 26.7 (1.2)  | 24.8 (0.8)   | 26.5 (0.8)   | 25.0 (1.0)    |          |
| Q2                   | 24.0 (1.0)  | 25.2 (1.0)  | 24.2 (0.7)   | 25.6 (0.8)   | 26.0 (0.9)    |          |
| Q3                   | 26.6 (1.0)  | 23.1 (0.9)  | 25.4 (0.7)   | 24.5 (0.7)   | 24.7 (0.9)    |          |
| Q4(lowest)           | 27.0 (1.4)  | 25.0 (1.3)  | 25.7 (1.0)   | 23.5 (0.8)   | 24.2 (1.2)    |          |
| <b>Prevalence§</b>   |             |             |              |              |               |          |
| Smoking              | 64.0 (0.02) | 54.8 (0.02) | 49.0 (0.02)  | 49.7 (0.02)  | 47.1 (0.02)   | 0.03     |
| Obesity              | 33.9 (0.02) | 38.4 (0.02) | 39.7 (0.02)  | 38.8 (0.02)  | 41.4 (0.02)   | 0.038    |
| Diabetes             | 7.3 (0.01)  | 9.2 (0.01)  | 8.9 (0.01)   | 8.8 (0.01)   | 9.9 (0.01)    | 0.076    |
| Hypertension         | 27.9 (0.02) | 26.8 (0.01) | 23.3 (0.01)  | 26.0 (0.01)  | 25.6 (0.01)   | 0.404    |
| Hypercholesterolemia | 8.6 (0.01)  | 7.4 (0.01)  | 9.5 (0.01)   | 11.7 (0.01)  | 12.6 (0.01)   | 0.062    |
| <b>Women</b>         |             |             |              |              |               |          |
| n                    | 3509        | 3276        | 7048         | 7410         | 4497          |          |
| Age                  | 41.6±0.3    | 41.6±0.3    | 42.7±0.2     | 43.5±0.2     | 44.2±0.2      | <0.001   |
| BMI                  | 23.4±0.1    | 23.4±0.1    | 23.2±0.1     | 23.3±0.1     | 23.1±0.1      | 0.018    |
| Education            |             |             |              |              |               | <0.001   |
| ≤6                   | 19.2 (1.1)  | 17.3 (0.9)  | 17.2 (0.6)   | 15.5 (0.6)   | 12.5 (0.7)    |          |
| 7-9                  | 14.6 (0.7)  | 13.2 (0.7)  | 12.3 (0.5)   | 11.6 (0.5)   | 10.2 (0.5)    |          |
| 10-12                | 42.2 (1.1)  | 42.0 (1.3)  | 40.6 (0.7)   | 38.9 (0.8)   | 38.3 (0.9)    |          |
| ≥13                  | 24.1 (1.4)  | 27.6 (1.5)  | 29.9 (0.9)   | 34.0 (0.9)   | 39.1 (1.1)    |          |
| Income‡              |             |             |              |              |               | 0.133    |
| Q1(highest)          | 23.1 (1.3)  | 25.9 (1.1)  | 24.3 (0.8)   | 27.6 (0.8)   | 24.7 (0.9)    |          |
| Q2                   | 24.0 (0.9)  | 25.7 (1.0)  | 25.3 (0.7)   | 25.8 (0.7)   | 25.0 (0.9)    |          |
| Q3                   | 26.1 (0.9)  | 24.2 (0.9)  | 25.2 (0.7)   | 24.4 (0.7)   | 25.1 (0.9)    |          |
| Q4(lowest)           | 26.9 (1.5)  | 24.2 (1.3)  | 25.2 (0.9)   | 22.3 (0.7)   | 25.2 (1.2)    |          |
| <b>Prevalence§</b>   |             |             |              |              |               |          |
| Smoking              | 3.7 (0.01)  | 5.4 (0.01)  | 6.0 (0.01)   | 6.9 (0.01)   | 5.8 (0.01)    | 0.125    |
| Obesity              | 30.8 (0.02) | 29.7 (0.02) | 26.8 (0.01)  | 28.0 (0.01)  | 24.4 (0.01)   | 0.036    |
| Diabetes             | 5.9 (0.01)  | 5.3 (0.01)  | 5.7 (0.01)   | 5.4 (0.01)   | 5.4 (0.01)    | 0.177    |
| Hypertension         | 17.7 (0.01) | 16.9 (0.01) | 15.3 (0.01)  | 16.1 (0.01)  | 14.2 (0.01)   | 0.034    |
| Hypercholesterolemia | 8.8 (0.01)  | 7.0 (0.01)  | 10.1 (0.01)  | 12.5 (0.01)  | 11.9 (0.01)   | <0.001   |

1  
2  
3  
4  
5  
6  
7  
8  
9  
10  
11  
12  
13  
14  
15  
16  
17  
18  
19  
20  
21  
22  
23  
24  
25  
26  
27  
28  
29  
30  
31  
32  
33  
34  
35  
36  
37  
38  
39  
40  
41  
42  
43  
44  
45  
46  
47  
48  
49  
50  
51  
52  
53  
54  
55  
56  
57  
58  
59  
60

---

Values given are n, prevalence (SE) or mean  $\pm$  SE  
\*KNHANES (Korean National Health and Nutrition Examination Survey)  
†P-value by ANOVA or  $\chi^2$  test  
‡Quartiles based on equivalised household income  
§ Age-adjusted prevalence. Small SE's are due to weighted samples, which are as large as whole population, being used for direct standardization.

For peer review only



Table 2 Age-adjusted odds ratios (OR) and 95% confidence interval (CI) and relative indices of inequalities (RII) in smoking by SES from 2001 to 2014

|                | KNHANES          |                  |                  |                  |                   |
|----------------|------------------|------------------|------------------|------------------|-------------------|
|                | II<br>2001       | III<br>2005      | IV<br>2007-9     | V<br>2010-12     | VI<br>2013-14     |
| <b>Men</b>     |                  |                  |                  |                  |                   |
| Education (yr) |                  |                  |                  |                  |                   |
| ≥13            | 1                | 1                | 1                | 1                | 1                 |
| 10-12          | 1.75 (1.45-2.12) | 1.86 (1.53-2.25) | 1.57 (1.37-1.81) | 1.47 (1.27-1.71) | 1.48 (1.23-1.78)  |
| 7-9            | 1.48 (1.14-1.93) | 1.57 (1.13-2.18) | 2.16 (1.72-2.71) | 1.62 (1.27-2.05) | 1.25 (0.92-1.72)  |
| ≤6             | 2.41 (1.72-3.37) | 2.22 (1.62-3.05) | 1.95 (1.53-2.48) | 1.71 (1.32-2.22) | 1.77 (1.26-2.49)  |
| RII (95% CI)   | 2.73 (1.97-3.79) | 2.75 (2.00-3.79) | 2.74 (2.16-3.48) | 2.16 (1.69-2.77) | 2.17 (1.57-3.00)  |
| P for trend    | 0.193            |                  |                  |                  |                   |
| Income         |                  |                  |                  |                  |                   |
| Q1(highest)    | 1                | 1                | 1                | 1                | 1                 |
| Q2             | 1.23 (0.97-1.55) | 1.34 (1.05-1.72) | 1.31 (1.11-1.56) | 1.09 (0.91-1.30) | 1.26 (1.00-1.59)  |
| Q3             | 1.49 (1.17-1.91) | 1.50 (1.21-1.86) | 1.56 (1.32-1.85) | 1.23 (1.01-1.49) | 1.34 (1.07-1.66)  |
| Q4(lowest)     | 1.74 (1.35-2.24) | 1.87 (1.46-2.40) | 1.79 (1.51-2.12) | 1.50 (1.24-1.81) | 1.43 (1.15-1.79)  |
| RII (95% CI)   | 2.10 (1.53-2.89) | 2.22 (1.63-3.02) | 2.16 (1.74-2.68) | 1.71 (1.34-2.18) | 1.57 (1.19-2.08)  |
| P for trend    | 0.087            |                  |                  |                  |                   |
| <b>Women</b>   |                  |                  |                  |                  |                   |
| Education (yr) |                  |                  |                  |                  |                   |
| ≥13            | 1                | 1                | 1                | 1                | 1                 |
| 10-12          | 1.25 (0.75-2.09) | 3.69 (2.07-6.57) | 3.95 (2.78-5.62) | 2.80 (1.97-4.00) | 4.08 (2.67-6.22)  |
| 7-9            | 1.55 (0.76-3.15) | 4.04 (1.95-8.34) | 6.47 (3.90-10.7) | 6.15 (3.65-10.4) | 7.75 (4.12-14.6)  |
| ≤6             | 1.98 (1.00-3.90) | 4.12 (1.92-8.86) | 7.59 (4.42-13.0) | 5.52 (3.06-9.9)  | 9.53 (4.88-18.6)  |
| RII (95% CI)   | 1.75 (0.87-3.52) | 3.41 (1.78-6.55) | 8.27 (5.05-13.6) | 6.81 (3.86-12.0) | 10.29 (5.23-20.2) |
| P for trend    | <0.001           |                  |                  |                  |                   |
| Income         |                  |                  |                  |                  |                   |
| Q1(highest)    | 1                | 1                | 1                | 1                | 1                 |
| Q2             | 0.53 (0.29-0.95) | 1.05 (0.58-1.91) | 0.95 (0.64-1.42) | 0.98 (0.66-1.46) | 1.54 (0.82-2.89)  |
| Q3             | 0.67 (0.39-1.13) | 1.50 (0.90-2.51) | 1.46 (1.02-2.09) | 1.48 (0.99-2.23) | 2.28 (1.29-4.00)  |
| Q4(lowest)     | 1.53 (0.95-2.47) | 2.74 (1.68-4.46) | 2.23 (1.57-3.17) | 2.53 (1.75-3.65) | 3.95 (2.34-6.66)  |
| RII (95% CI)   | 1.92 (0.88-4.21) | 4.45 (2.26-8.76) | 3.36 (2.10-5.39) | 4.11 (2.46-6.88) | 6.27 (3.22-12.20) |
| P for trend    | 0.043            |                  |                  |                  |                   |

## Obesity

We found significant increased trends in the mean BMI (23.9 kg/m<sup>2</sup> in 2001 and 24.6 kg/m<sup>2</sup> in 2014, p <0.001) and the age-adjusted prevalence of obesity (34% for 2001 and 41% for 2014, p=0.038) over time in men (Table 1). In contrast, women showed decreasing trends in mean BMI and the age-adjusted prevalence of obesity (23.4 kg/m<sup>2</sup> in 2001 and 23.1 kg/m<sup>2</sup> in 2014, p=0.018, 31% in 2001 and 24% in 2014, p=0.036; Table 1). Time trends in socioeconomic inequalities in obesity were stable among men; however, a time trend toward increasing inequality in obesity by income was noted in women (1.72, 1.19-2.48 in 2001; 2.69, 2.02-3.59 in 2014, p=0.03, RII, 95% CI, respectively; Table 3).

## Diabetes

The age-adjusted prevalence of diabetes did not change significantly over time in either gender (Table 1). Although no significant time trend in socioeconomic inequality for diabetes prevalence was seen in men, significantly increasing inequality in diabetes prevalence was noticed in women, especially by income (0.76, 0.36-1.58 in 2001; 2.56, 1.55-4.22 in 2014, RII, 95% CI, p=0.01, respectively; Table 4).

## Hypertension

The age-adjusted prevalence of hypertension did not change significantly over time among men (Table 1). However, the age-adjusted prevalence of hypertension was decreased over time among women. There were also gender differences in the time trend with regard to socioeconomic inequalities in hypertension (Table 5). In men, socioeconomic differences

Table 3 Age-adjusted OR, 95% CI and RII in obesity by SES from 2001 to 2014

|                | KNHANES          |                  |                  |                  |                  |
|----------------|------------------|------------------|------------------|------------------|------------------|
|                | II<br>2001       | III<br>2005      | IV<br>2007-9     | V<br>2010-12     | VI<br>2013-14    |
| <b>Men</b>     |                  |                  |                  |                  |                  |
| Education (yr) |                  |                  |                  |                  |                  |
| ≥13            | 1                | 1                | 1                | 1                | 1                |
| 10-12          | 0.96 (0.78-1.20) | 0.86 (0.66-1.12) | 0.91 (0.79-1.04) | 0.89 (0.76-1.04) | 1.03 (0.86-1.23) |
| 7-9            | 0.90 (0.64-1.26) | 0.90 (0.57-1.44) | 0.80 (0.65-1.00) | 0.88 (0.67-1.14) | 0.94 (0.68-1.30) |
| ≤6             | 0.83 (0.55-1.23) | 0.43 (0.27-0.67) | 0.74 (0.58-0.93) | 0.64 (0.48-0.84) | 0.80 (0.57-1.11) |
| RII (95% CI)   | 0.95 (0.66-1.38) | 0.63 (0.40-0.98) | 0.74 (0.58-0.94) | 0.79 (0.60-1.03) | 0.98 (0.72-1.34) |
| P for trend    | 0.673            |                  |                  |                  |                  |
| Income         |                  |                  |                  |                  |                  |
| Q1(highest)    | 1                | 1                | 1                | 1                | 1                |
| Q2             | 1.15 (0.88-1.51) | 0.89 (0.63-1.26) | 1.02 (0.86-1.21) | 0.89 (0.73-1.08) | 0.90 (0.73-1.10) |
| Q3             | 0.92 (0.70-1.20) | 0.71 (0.52-0.97) | 1.02 (0.84-1.23) | 0.97 (0.81-1.17) | 1.15 (0.91-1.44) |
| Q4(lowest)     | 1.11 (0.83-1.47) | 0.76 (0.55-1.06) | 0.96 (0.80-1.15) | 0.74 (0.61-0.90) | 0.85 (0.69-1.05) |
| RII (95% CI)   | 1.02 (0.71-1.45) | 0.66 (0.43-1.02) | 0.95 (0.75-1.20) | 0.72 (0.57-0.92) | 0.91 (0.70-1.20) |
| P for trend    | 0.778            |                  |                  |                  |                  |
| <b>Women</b>   |                  |                  |                  |                  |                  |
| Education (yr) |                  |                  |                  |                  |                  |
| ≥13            | 1                | 1                | 1                | 1                | 1                |
| 10-12          | 2.64 (1.93-3.60) | 1.99 (1.43-2.77) | 1.74 (1.46-2.08) | 1.90 (1.59-2.28) | 1.76 (1.43-2.18) |
| 7-9            | 5.53 (3.83-7.98) | 2.84 (1.86-4.34) | 2.49 (1.98-3.12) | 2.45 (1.92-3.12) | 2.92 (2.16-3.96) |
| ≤6             | 3.79 (2.52-5.72) | 3.42 (2.28-5.15) | 3.55 (2.81-4.50) | 2.65 (2.09-3.37) | 3.99 (2.92-5.45) |
| RII (95% CI)   | 3.19 (2.23-4.57) | 3.45 (2.17-5.47) | 3.57 (2.83-4.51) | 2.93 (2.29-3.73) | 4.01 (2.94-5.49) |
| P for trend    | 0.617            |                  |                  |                  |                  |
| Income         |                  |                  |                  |                  |                  |
| Q1(highest)    | 1                | 1                | 1                | 1                | 1                |
| Q2             | 1.17 (0.90-1.51) | 1.50 (1.06-2.11) | 1.05 (0.87-1.26) | 1.32 (1.07-1.63) | 1.65 (1.29-2.10) |
| Q3             | 1.30 (0.97-1.73) | 1.43 (1.03-1.98) | 1.48 (1.24-1.77) | 1.51 (1.25-1.83) | 1.97 (1.58-2.47) |
| Q4(lowest)     | 1.53 (1.15-2.03) | 1.63 (1.16-2.29) | 1.61 (1.34-1.93) | 1.88 (1.54-2.29) | 2.21 (1.74-2.81) |
| RII (95% CI)   | 1.72 (1.19-2.48) | 1.73 (1.15-2.61) | 2.03 (1.61-2.56) | 2.21 (1.73-2.83) | 2.69 (2.02-3.59) |
| P for trend    | 0.032            |                  |                  |                  |                  |

Table 4 Age-adjusted OR, 95% CI and RII in diabetes by SES from 2005 to 2014

|                | KNHAENS          |                  |                  |                  |
|----------------|------------------|------------------|------------------|------------------|
|                | III<br>2005      | IV<br>2007-9     | V<br>2010-12     | VI<br>2013-14    |
| <b>Men</b>     |                  |                  |                  |                  |
| Education (yr) |                  |                  |                  |                  |
| ≥13            | 1                | 1                | 1                | 1                |
| 10-12          | 1.21 (0.72-2.03) | 0.98 (0.74-1.28) | 1.39 (1.05-1.85) | 1.14 (0.82-1.57) |
| 7-9            | 1.20 (0.64-2.25) | 1.05 (0.73-1.52) | 1.41 (0.96-2.06) | 1.13 (0.71-1.81) |
| ≤6             | 1.42 (0.77-2.59) | 0.92 (0.64-1.32) | 1.30 (0.88-1.90) | 1.06 (0.65-1.73) |
| RII (95% CI)   | 1.41 (0.72-2.77) | 0.91 (0.59-1.40) | 1.38 (0.91-2.09) | 1.09 (0.64-1.85) |
| P for trend    |                  | 0.838            |                  |                  |
| Income         |                  |                  |                  |                  |
| Q1(highest)    | 1                | 1                | 1                | 1                |
| Q2             | 0.53 (0.30-0.93) | 1.12 (0.81-1.56) | 0.76 (0.54-1.07) | 0.86 (0.58-1.30) |
| Q3             | 0.84 (0.49-1.43) | 0.96 (0.69-1.32) | 0.90 (0.64-1.27) | 1.06 (0.73-1.55) |
| Q4(lowest)     | 0.93 (0.57-1.53) | 1.48 (1.09-2.01) | 1.06 (0.77-1.46) | 1.34 (0.92-1.95) |
| RII (95% CI)   | 1.08 (0.53-2.18) | 1.53 (1.02-2.30) | 1.17 (0.76-1.79) | 1.55 (0.95-2.56) |
| P for trend    |                  | 0.557            |                  |                  |
| <b>Women</b>   |                  |                  |                  |                  |
| Education (yr) |                  |                  |                  |                  |
| ≥13            | 1                | 1                | 1                | 1                |
| 10-12          | 2.69 (1.11-6.53) | 2.04 (1.28-3.23) | 2.10 (1.30-3.40) | 1.38 (0.89-2.12) |
| 7-9            | 3.30 (1.00-10.9) | 1.76 (1.02-3.05) | 2.23 (1.26-3.96) | 1.76 (1.02-3.02) |
| ≤6             | 4.33 (1.42-13.3) | 3.29 (1.93-5.59) | 2.85 (1.62-5.02) | 1.68 (0.99-2.87) |
| RII (95% CI)   | 3.69 (0.99-13.8) | 3.33 (1.99-5.57) | 2.61 (1.57-4.35) | 1.92 (1.14-3.23) |
| P for trend    |                  | 0.254            |                  |                  |
| Income         |                  |                  |                  |                  |
| Q1(highest)    | 1                | 1                | 1                | 1                |
| Q2             | 0.86 (0.46-1.59) | 1.06 (0.70-1.59) | 1.84 (1.21-2.79) | 1.13 (0.72-1.78) |
| Q3             | 1.10 (0.62-1.98) | 1.75 (1.23-2.50) | 2.36 (1.55-3.57) | 1.23 (0.79-1.91) |
| Q4(lowest)     | 0.71 (0.39-1.31) | 1.99 (1.39-2.87) | 2.56 (1.72-3.82) | 2.04 (1.38-3.01) |
| RII (95% CI)   | 0.76 (0.36-1.58) | 2.80 (1.77-4.42) | 2.90 (1.89-4.47) | 2.56 (1.55-4.22) |
| P for trend    |                  | 0.015            |                  |                  |

Table 5 Age-adjusted OR, 95% CI and RII of hypertension by SES from 2001 to 2014

|                | KNHANES          |                  |                  |                  |                  |
|----------------|------------------|------------------|------------------|------------------|------------------|
|                | II<br>2001       | III<br>2005      | IV<br>2007-9     | V<br>2010-12     | VI<br>2013-14    |
| <b>Men</b>     |                  |                  |                  |                  |                  |
| Education (yr) |                  |                  |                  |                  |                  |
| ≥13            | 1                | 1                | 1                | 1                | 1                |
| 10-12          | 1.43 (1.08-1.89) | 1.03 (0.75-1.40) | 1.03 (0.86-1.25) | 1.15 (0.97-1.38) | 0.97 (0.78-1.22) |
| 7-9            | 1.22 (0.84-1.78) | 1.50 (0.96-2.36) | 0.98 (0.77-1.24) | 1.12 (0.87-1.44) | 0.93 (0.69-1.24) |
| ≤6             | 1.17 (0.77-1.79) | 1.31 (0.85-2.02) | 1.08 (0.84-1.40) | 1.15 (0.89-1.49) | 1.01 (0.70-1.47) |
| RII (95% CI)   | 1.34 (0.88-2.03) | 1.41 (0.90-2.20) | 1.08 (0.82-1.42) | 1.16 (0.88-1.52) | 0.93 (0.66-1.32) |
| P for trend    | 0.133            |                  |                  |                  |                  |
| Income         |                  |                  |                  |                  |                  |
| Q1(highest)    | 1                | 1                | 1                | 1                | 1                |
| Q2             | 1.21 (0.86-1.69) | 0.87 (0.59-1.29) | 1.09 (0.88-1.35) | 1.13 (0.91-1.42) | 1.28 (0.95-1.71) |
| Q3             | 1.10 (0.76-1.59) | 0.95 (0.70-1.29) | 1.11 (0.89-1.39) | 1.11 (0.89-1.37) | 1.09 (0.83-1.43) |
| Q4(lowest)     | 1.58 (1.14-2.19) | 1.23 (0.90-1.69) | 1.23 (0.99-1.54) | 1.11 (0.89-1.38) | 1.05 (0.80-1.39) |
| RII (95% CI)   | 1.64 (1.09-2.49) | 1.37 (0.91-2.06) | 1.30 (0.99-1.71) | 1.11 (0.85-1.46) | 0.99 (0.71-1.39) |
| P for trend    | 0.042            |                  |                  |                  |                  |
| <b>Women</b>   |                  |                  |                  |                  |                  |
| Education (yr) |                  |                  |                  |                  |                  |
| ≥13            | 1                | 1                | 1                | 1                | 1                |
| 10-12          | 1.55 (0.93-2.61) | 1.91 (1.14-3.18) | 2.21 (1.62-3.02) | 1.69 (1.32-2.17) | 1.80 (1.30-2.47) |
| 7-9            | 2.64 (1.47-4.76) | 2.90 (1.60-5.25) | 2.50 (1.76-3.55) | 2.15 (1.58-2.92) | 2.59 (1.78-3.77) |
| ≤6             | 1.79 (0.99-3.24) | 3.18 (1.68-5.99) | 2.69 (1.91-3.80) | 2.45 (1.83-3.30) | 3.06 (2.10-4.46) |
| RII (95% CI)   | 1.48 (0.89-2.46) | 2.11 (1.21-3.69) | 1.93 (1.38-2.70) | 2.15 (1.56-2.97) | 2.91 (1.98-4.29) |
| P for trend    | 0.060            |                  |                  |                  |                  |
| Income         |                  |                  |                  |                  |                  |
| Q1(highest)    | 1                | 1                | 1                | 1                | 1                |
| Q2             | 1.48 (1.06-2.07) | 1.37 (0.92-2.05) | 0.99 (0.80-1.23) | 1.04 (0.82-1.33) | 1.44 (1.04-1.98) |
| Q3             | 1.15 (0.78-1.69) | 1.33 (0.92-1.93) | 1.25 (1.00-1.55) | 1.29 (1.01-1.65) | 2.33 (1.74-3.13) |
| Q4(lowest)     | 1.29 (0.85-1.94) | 1.50 (0.99-2.28) | 1.39 (1.11-1.76) | 1.41 (1.11-1.78) | 1.73 (1.28-2.36) |
| RII (95% CI)   | 1.22 (0.73-2.04) | 1.62 (0.97-2.71) | 1.63 (1.20-2.22) | 1.65 (1.23-2.21) | 2.32 (1.63-3.30) |
| P for trend    | 0.056            |                  |                  |                  |                  |

1  
2  
3  
4 decreased with income over the past 14 years (1.64, 1.09-2.49 in 2001; 0.99, 0.71-1.39 in  
5  
6 2014, RII, 95% CI,  $p=0.04$ ), whereas inequalities were increased with marginal significance  
7  
8 among women during the same period (1.48, 0.89-2.46 in 2001; 2.91, 1.98-4.29 in 2014, RII,  
9  
10 95% CI,  $p=0.06$ , by education; 1.22, 0.73-2.04 in 2001; 2.32, 1.63-3.30 in 2014, RII, 95% CI,  
11  
12  $p=0.056$ , by income, respectively; Table 5).

### 13 14 15 16 17 18 19 **Hypercholesterolemia**

20  
21 The age-adjusted prevalence of hypercholesterolemia among men increased with marginal  
22  
23 statistical significance. The age-adjusted prevalence of hypercholesterolemia among women  
24  
25 increased over time (Table 1). There was no significant association between SES and  
26  
27 hypercholesterolemia in either gender (Table 6).

## 28 29 30 31 32 **DISCUSSION**

33  
34 The results of this study reflect gender differences not only in the relationships between  
35  
36 major CVD risk factors and SES, but also in the linear time trends in socioeconomic  
37  
38 inequalities in major CVD risk factors among Koreans. Among men, no major CVD risk  
39  
40 factor, except for smoking showed significant associations with SES. Indeed, socioeconomic  
41  
42 inequalities for major CVD risk factors were stable over time and inequality for hypertension  
43  
44 decreased over the past 14 years. However, women with a lower SES had higher risks of  
45  
46 smoking, obesity, diabetes and hypertension than did those with a higher SES. Increasing  
47  
48 trends in socioeconomic inequalities in smoking, obesity and diabetes, especially measured  
49  
50 by income, were noted in Korean women. In contrast to the other CVD risk factors,  
51  
52 hypercholesterolemia was not associated with socioeconomic inequalities in either gender.  
53  
54  
55  
56  
57  
58  
59  
60

Table 6 Age-adjusted OR, 95% CI and RII of hypercholesterolemia by SES from 2005 to 2014

|                | KNHANES          |                  |                  |                  |
|----------------|------------------|------------------|------------------|------------------|
|                | III<br>2005      | IV<br>2007-9     | V<br>2010-12     | VI<br>2013-14    |
| <b>Men</b>     |                  |                  |                  |                  |
| Education(yr)  |                  |                  |                  |                  |
| ≥13            | 1                | 1                | 1                | 1                |
| 10-12          | 1.12 (0.68-1.82) | 1.06 (0.82-1.36) | 1.12 (0.88-1.43) | 1.08 (0.81-1.42) |
| 7-9            | 0.72 (0.29-1.79) | 1.16 (0.80-1.69) | 1.05 (0.77-1.44) | 0.91 (0.54-1.52) |
| ≤6             | 1.02 (0.55-1.91) | 0.83 (0.57-1.23) | 1.09 (0.74-1.60) | 0.92 (0.58-1.45) |
| RII (95% CI)   | 0.89 (0.42-1.87) | 1.00 (0.67-1.51) | 1.14 (0.79-1.65) | 0.93 (0.57-1.53) |
| P for trend    |                  | 0.906            |                  |                  |
| Income         |                  |                  |                  |                  |
| Q1 (highest)   | 1                | 1                | 1                | 1                |
| Q2             | 0.54 (0.29-1.01) | 0.86 (0.63-1.17) | 0.64 (0.48-0.85) | 1.15 (0.81-1.64) |
| Q3             | 0.87 (0.46-1.66) | 0.88 (0.66-1.18) | 0.97 (0.74-1.28) | 0.81 (0.56-1.18) |
| Q4 (lowest)    | 0.98 (0.54-1.78) | 1.02 (0.77-1.35) | 0.93 (0.71-1.21) | 0.85 (0.59-1.23) |
| RII (95% CI)   | 1.14 (0.48-2.72) | 1.02 (0.71-1.48) | 1.08 (0.76-1.54) | 0.72 (0.45-1.14) |
| P for trend    |                  | 0.301            |                  |                  |
| <b>Women</b>   |                  |                  |                  |                  |
| Education (yr) |                  |                  |                  |                  |
| ≥13            | 1                | 1                | 1                | 1                |
| 10-12          | 0.95 (0.47-0.91) | 0.76 (0.56-1.02) | 1.31 (0.99-1.73) | 0.84 (0.62-1.15) |
| 7-9            | 0.66 (0.30-1.44) | 0.74 (0.52-1.05) | 1.12 (0.80-1.56) | 0.95 (0.63-1.43) |
| ≤6             | 0.69 (0.31-1.57) | 0.83 (0.58-1.19) | 1.19 (0.84-1.67) | 0.95 (0.63-1.43) |
| RII (95% CI)   | 0.64 (0.27-1.53) | 0.85 (0.58-1.24) | 1.08 (0.75-1.54) | 0.85 (0.55-1.33) |
| P for trend    |                  | 0.499            |                  |                  |
| Income         |                  |                  |                  |                  |
| Q1 (highest)   | 1                | 1                | 1                | 1                |
| Q2             | 0.82 (0.47-1.44) | 0.88 (0.67-1.17) | 0.98 (0.77-1.24) | 0.79 (0.58-1.09) |
| Q3             | 0.65 (0.36-1.17) | 0.97 (0.73-1.28) | 0.93 (0.72-1.19) | 1.29 (0.95-1.75) |
| Q4 (lowest)    | 0.96 (0.59-1.54) | 1.08 (0.82-1.42) | 1.12 (0.88-1.42) | 1.02 (0.76-1.37) |
| RII (95% CI)   | 0.87 (0.44-1.70) | 1.13 (0.79-1.61) | 1.14 (0.84-1.54) | 1.24 (0.85-1.81) |
| P for trend    |                  | 0.397            |                  |                  |

1  
2  
3  
4 Socioeconomic inequalities in CVD risk factors and disease-related mortality are well known  
5  
6 in industrialised Western countries and are now being found in many developing countries as  
7  
8 well.[1-2, 18-19] However, there has been relatively little research examining time trends in  
9  
10 socioeconomic inequalities in these CVD risk factors.[6-8] To our knowledge, this is the first  
11  
12 report on trends in socioeconomic inequalities in major CVD risk factors in an Asian nation.  
13  
14

15  
16 In this study, distinct gender differences in time trend for smoking prevalence were found  
17  
18 between Korean men and women, which is consistent with trends in other Asian countries,  
19  
20 such as China and Taiwan.[20–21] Over the past 14 years, the smoking prevalence in men  
21  
22 decreased, but that among women did not change significantly. Consistent with previous  
23  
24 reports, our study showed that Koreans with a lower SES had higher smoking prevalence  
25  
26 than those with a higher SES in both gender.[22-23] However, our study further showed  
27  
28 gender differences in the time trend of smoking inequality. Based on the RII trend, the trend  
29  
30 in inequality was stable among men, but the socioeconomic gap among women widened.  
31  
32 There has been significant progress with anti-smoking policies in Korea in recent years. In  
33  
34 1995, the Health Promotion Act was enacted and restricted smoking in public buildings and  
35  
36 places. In 2004, a significant increase in taxation of tobacco products began.[24] We  
37  
38 suspected that these policies may have been effective among men in all socioeconomic  
39  
40 groups, but they were ineffective for women with lower SES.  
41  
42  
43  
44  
45

46 Over the past 14 years, the prevalence of obesity has increased in men, but it has decreased in  
47  
48 women. Among men, SES was not associated with the prevalence of obesity; however, lower  
49  
50 SES was associated with a higher prevalence of obesity in women, reflecting gender  
51  
52 differences in attitudes towards body image in Korea.[25] Men and women could have  
53  
54 different attitudes toward body weight status and may use different methods for controlling  
55  
56 body weight. As societies develop, women tend to acquire a more negative attitude towards  
57  
58  
59  
60



1  
2  
3  
4 obesity than do men. Additionally, public attitudes are more strongly negative towards obese  
5 women than towards obese men. Thus, women are more likely to use their resources to  
6 pursue a thinner body than are men, and women tend to shift their diet and activity patterns to  
7 a healthier lifestyle more rapidly than do men.[26-27]  
8  
9

10  
11  
12  
13 The prevalence of diabetes did not change in either gender during the study period. Our study  
14 found gender differences in association between SES and the prevalence of diabetes, which is  
15 consistent with previous studies that reported the influence of SES on the risk of diabetes was  
16 more pronounced in women than in men.[19, 28-30] To our knowledge, there is no previous  
17 study investigating time trends in socioeconomic inequalities for diabetes in Koreans. The  
18 inequality in diabetes among women, measured by income, increased during the past 14 years,  
19 which is consistent with previous studies in other countries.[31-32] Although the reasons for  
20 this gender difference remain unclear, several plausible explanations that relate low SES to an  
21 increased risk of diabetes in women can be proposed. Socioeconomic inequalities may cause  
22 differing lifestyle behaviours, such as alcohol intake and physical activity. Women with a  
23 lower SES have higher risk of harmful alcohol consumption, smoking and lack of physical  
24 activity.[3, 33-34] It may also be related to less social support and poorer access to healthcare  
25 services, leading to lower levels of the detection and treatment of diabetes and its associated  
26 risk factors.[35] Finally, women with a lower SES may have poor eating habits, such as a less  
27 intake of fruits and vegetables.[36]  
28  
29  
30  
31  
32  
33  
34  
35  
36  
37  
38  
39  
40  
41  
42  
43  
44  
45  
46

47 During the study period, the prevalence of hypertension did not change among men, but  
48 decreased among women. The pattern of associations between SES and risk of hypertension  
49 differed by gender, which is consistent with a previous study.[37] The influence of low SES  
50 on hypertension was more prominent and socioeconomic inequalities widened with marginal  
51 statistical significance in women during study period. In contrast, the socioeconomic  
52  
53  
54  
55  
56  
57  
58  
59  
60

1  
2  
3  
4 inequality among men was decreased, although the reason for this alleviation of inequality  
5  
6 was not clear. One possible explanation is that the marginally significant diminished  
7  
8 inequality with respect to smoking in men during the study period may mitigate the inequality.  
9

10  
11 Trends in socioeconomic inequalities in obesity and diabetes among women increased by  
12  
13 income level, but they were not significant when measured by education. Rapid social change  
14  
15 has affected the meaning of education level; for example, the proportion of women who had  
16  
17 an education level of college or above was 24% in KNHANES II (2001). However, it was  
18  
19 ~40% in KNHANES VI (2013-2014). Thus, caution is needed in comparing education  
20  
21 groups across time, especially in rapidly changing societies. Additionally, it may be better to  
22  
23 divide education levels into equal parts to investigate health inequalities.[26, 38]  
24  
25  
26  
27

28  
29 Investigating the trend of RIIs was a commonly used method to assess relative measure of  
30  
31 health inequality, but in some cases, absolute and relative measure may diverge with respect  
32  
33 to magnitude or the direction of change in health inequality.[39] Therefore, we also examined  
34  
35 the SIIs as absolute measures of inequalities for five major CVD risk factors, and found no  
36  
37 difference in trends between relative and absolute inequalities (Supplementary Table 1-5).  
38  
39

40  
41 Two strengths of our study are that study subjects were a nationally representative sample  
42  
43 and that the time trends of the relationship between SES and five major CVD risk factors  
44  
45 were examined using two SES measures (education level, household income). However,  
46  
47 several limitations also be noted. First, the study was cross-sectional in nature; thus, it was  
48  
49 difficult to determine causal relationships between SES and CVD risk factors. Second, the  
50  
51 KNHANES is a self-report survey and therefore prone to measurement error and recall bias  
52  
53 as well as heterogeneity in self-reported health. Third, the steady decline in response rates in  
54  
55 the KNHANES should not be overlooked, which could result in underestimating  
56  
57  
58  
59  
60

1  
2  
3  
4 inequalities.[40] Moreover, item responses were possibly associated with SES because there  
5  
6 were significantly different SES distributions between item responders and non-responders  
7  
8 for each of risk factor (Supplementary Tables 6-10), which may have resulted in  
9  
10 underestimation. Fourth, the generalisability of our results to whole Korean population is  
11  
12 limited since our study included only individuals aged 25-64 years, and institutionalised older  
13  
14 adults were excluded.[11] Finally, we could not examine longer-term trends in  
15  
16 socioeconomic inequalities in CVD risk factors before 2001, because, following the authors'  
17  
18 judgement, the KNHANES I (1998) survey data were excluded due to lack of reliability.  
19  
20  
21  
22  
23  
24  
25  
26

## 27 **CONCLUSIONS**

28  
29  
30 This study found that relationships between SES and major CVD risk factors (smoking,  
31  
32 obesity, diabetes, hypertension) were more prominent in Korean women than men. Health  
33  
34 inequalities, especially measured by income, for smoking, obesity and diabetes increased  
35  
36 among Korean women over the past 14 years. Public policies should be implemented to  
37  
38 prevent risk factors for CVD among Korean women with a lower SES.  
39  
40  
41  
42  
43  
44

45 **Contributors** YJK, SGK, JL and JSL developed the research questions and contributed to  
46  
47 the development of the conceptual framework, and the interpretations of the results. YJK  
48  
49 contributed to writing and submitting the manuscript. JSL performed the main analyses and  
50  
51 critical revisions to the manuscript. JP provided theoretical support and DSC, DMK, KL and  
52  
53  
54  
55  
56  
57  
58  
59  
60  
61  
62  
63  
64  
65  
66  
67  
68  
69  
70  
71  
72  
73  
74  
75  
76  
77  
78  
79  
80  
81  
82  
83  
84  
85  
86  
87  
88  
89  
90  
91  
92  
93  
94  
95  
96  
97  
98  
99  
100  
101  
102  
103  
104  
105  
106  
107  
108  
109  
110  
111  
112  
113  
114  
115  
116  
117  
118  
119  
120  
121  
122  
123  
124  
125  
126  
127  
128  
129  
130  
131  
132  
133  
134  
135  
136  
137  
138  
139  
140  
141  
142  
143  
144  
145  
146  
147  
148  
149  
150  
151  
152  
153  
154  
155  
156  
157  
158  
159  
160  
161  
162  
163  
164  
165  
166  
167  
168  
169  
170  
171  
172  
173  
174  
175  
176  
177  
178  
179  
180  
181  
182  
183  
184  
185  
186  
187  
188  
189  
190  
191  
192  
193  
194  
195  
196  
197  
198  
199  
200  
201  
202  
203  
204  
205  
206  
207  
208  
209  
210  
211  
212  
213  
214  
215  
216  
217  
218  
219  
220  
221  
222  
223  
224  
225  
226  
227  
228  
229  
230  
231  
232  
233  
234  
235  
236  
237  
238  
239  
240  
241  
242  
243  
244  
245  
246  
247  
248  
249  
250  
251  
252  
253  
254  
255  
256  
257  
258  
259  
260  
261  
262  
263  
264  
265  
266  
267  
268  
269  
270  
271  
272  
273  
274  
275  
276  
277  
278  
279  
280  
281  
282  
283  
284  
285  
286  
287  
288  
289  
290  
291  
292  
293  
294  
295  
296  
297  
298  
299  
300  
301  
302  
303  
304  
305  
306  
307  
308  
309  
310  
311  
312  
313  
314  
315  
316  
317  
318  
319  
320  
321  
322  
323  
324  
325  
326  
327  
328  
329  
330  
331  
332  
333  
334  
335  
336  
337  
338  
339  
340  
341  
342  
343  
344  
345  
346  
347  
348  
349  
350  
351  
352  
353  
354  
355  
356  
357  
358  
359  
360  
361  
362  
363  
364  
365  
366  
367  
368  
369  
370  
371  
372  
373  
374  
375  
376  
377  
378  
379  
380  
381  
382  
383  
384  
385  
386  
387  
388  
389  
390  
391  
392  
393  
394  
395  
396  
397  
398  
399  
400  
401  
402  
403  
404  
405  
406  
407  
408  
409  
410  
411  
412  
413  
414  
415  
416  
417  
418  
419  
420  
421  
422  
423  
424  
425  
426  
427  
428  
429  
430  
431  
432  
433  
434  
435  
436  
437  
438  
439  
440  
441  
442  
443  
444  
445  
446  
447  
448  
449  
450  
451  
452  
453  
454  
455  
456  
457  
458  
459  
460  
461  
462  
463  
464  
465  
466  
467  
468  
469  
470  
471  
472  
473  
474  
475  
476  
477  
478  
479  
480  
481  
482  
483  
484  
485  
486  
487  
488  
489  
490  
491  
492  
493  
494  
495  
496  
497  
498  
499  
500  
501  
502  
503  
504  
505  
506  
507  
508  
509  
510  
511  
512  
513  
514  
515  
516  
517  
518  
519  
520  
521  
522  
523  
524  
525  
526  
527  
528  
529  
530  
531  
532  
533  
534  
535  
536  
537  
538  
539  
540  
541  
542  
543  
544  
545  
546  
547  
548  
549  
550  
551  
552  
553  
554  
555  
556  
557  
558  
559  
560  
561  
562  
563  
564  
565  
566  
567  
568  
569  
570  
571  
572  
573  
574  
575  
576  
577  
578  
579  
580  
581  
582  
583  
584  
585  
586  
587  
588  
589  
590  
591  
592  
593  
594  
595  
596  
597  
598  
599  
600  
601  
602  
603  
604  
605  
606  
607  
608  
609  
610  
611  
612  
613  
614  
615  
616  
617  
618  
619  
620  
621  
622  
623  
624  
625  
626  
627  
628  
629  
630  
631  
632  
633  
634  
635  
636  
637  
638  
639  
640  
641  
642  
643  
644  
645  
646  
647  
648  
649  
650  
651  
652  
653  
654  
655  
656  
657  
658  
659  
660  
661  
662  
663  
664  
665  
666  
667  
668  
669  
670  
671  
672  
673  
674  
675  
676  
677  
678  
679  
680  
681  
682  
683  
684  
685  
686  
687  
688  
689  
690  
691  
692  
693  
694  
695  
696  
697  
698  
699  
700  
701  
702  
703  
704  
705  
706  
707  
708  
709  
710  
711  
712  
713  
714  
715  
716  
717  
718  
719  
720  
721  
722  
723  
724  
725  
726  
727  
728  
729  
730  
731  
732  
733  
734  
735  
736  
737  
738  
739  
740  
741  
742  
743  
744  
745  
746  
747  
748  
749  
750  
751  
752  
753  
754  
755  
756  
757  
758  
759  
760  
761  
762  
763  
764  
765  
766  
767  
768  
769  
770  
771  
772  
773  
774  
775  
776  
777  
778  
779  
780  
781  
782  
783  
784  
785  
786  
787  
788  
789  
790  
791  
792  
793  
794  
795  
796  
797  
798  
799  
800  
801  
802  
803  
804  
805  
806  
807  
808  
809  
810  
811  
812  
813  
814  
815  
816  
817  
818  
819  
820  
821  
822  
823  
824  
825  
826  
827  
828  
829  
830  
831  
832  
833  
834  
835  
836  
837  
838  
839  
840  
841  
842  
843  
844  
845  
846  
847  
848  
849  
850  
851  
852  
853  
854  
855  
856  
857  
858  
859  
860  
861  
862  
863  
864  
865  
866  
867  
868  
869  
870  
871  
872  
873  
874  
875  
876  
877  
878  
879  
880  
881  
882  
883  
884  
885  
886  
887  
888  
889  
890  
891  
892  
893  
894  
895  
896  
897  
898  
899  
900  
901  
902  
903  
904  
905  
906  
907  
908  
909  
910  
911  
912  
913  
914  
915  
916  
917  
918  
919  
920  
921  
922  
923  
924  
925  
926  
927  
928  
929  
930  
931  
932  
933  
934  
935  
936  
937  
938  
939  
940  
941  
942  
943  
944  
945  
946  
947  
948  
949  
950  
951  
952  
953  
954  
955  
956  
957  
958  
959  
960  
961  
962  
963  
964  
965  
966  
967  
968  
969  
970  
971  
972  
973  
974  
975  
976  
977  
978  
979  
980  
981  
982  
983  
984  
985  
986  
987  
988  
989  
990  
991  
992  
993  
994  
995  
996  
997  
998  
999  
1000

1  
2  
3  
4 **Funding** Dr. J. Lee's research was supported by a grant of College of Medicine, Korea  
5  
6 University, Seoul, Republic of Korea (Grant No. K1616241)  
7  
8  
9

10  
11  
12 **Competing interests** None declared.  
13

14  
15  
16  
17  
18 **Ethical approval** All procedures and protocols of the study were approved by the  
19  
20 Institutional Review Board of the Korea Center for Disease Control and Prevention (KCDC)  
21  
22 since 2007. Written informed consent regarding the survey and blood analysis has been  
23  
24 obtained from all participants since 2001.  
25  
26  
27  
28  
29

30 **Provenance and peer review** Not commissioned; externally peer reviewed.  
31  
32  
33  
34  
35

36 **Data sharing statement** No additional data are available.  
37  
38  
39  
40  
41  
42  
43  
44  
45  
46  
47  
48  
49  
50  
51  
52  
53  
54  
55  
56  
57  
58  
59  
60

## REFERENCES

1. Strand BH, Tverdal A. Can cardiovascular risk factors and lifestyle explain the educational inequalities in mortality from ischaemic heart disease and from other heart diseases? 26 year follow up of 50,000 Norwegian men and women. *J Epidemiol Community Health* 2004;58:705-9.
2. Mackenbach JP, Cavelaars AE, Kunst AE, *et al.* Socioeconomic inequalities in cardiovascular disease mortality; an international study. *Eur Heart J* 2000;21(14):1141-51.
3. Khang YH, Lynch JW, Jung-Choi K, *et al.* Explaining age-specific inequalities in mortality from all causes, cardiovascular disease and ischaemic heart disease among South Korean male public servants: relative and absolute perspectives. *Heart* 2008;94(1):75-82.
4. Mackenbach JP, Stirbu I, Roskam AJ, *et al.* Socioeconomic inequalities in health in 22 European countries. *N Engl J Med* 2008;358(23):2468-81.
5. Cooper R, Cutler J, Desvigne-Nickens P, *et al.* Trends and disparities in coronary heart disease, stroke, and other cardiovascular diseases in the United States: findings of the national conference on cardiovascular disease prevention. *Circulation* 2000;102:3137-47.
6. Kanjilal S, Gregg EW, Cheng YJ, *et al.* Socioeconomic status and trends in disparities in 4 major risk factors for cardiovascular disease among US adults, 1971-2002. *Arch Intern Med* 2006;166(21):2348-55.
7. Bartley M, Fitzpatrick R, Firth D, *et al.* Social distribution of cardiovascular disease risk factors: changes among men in England 1984-1993. *J Epidemiol Community Health* 2000;54(11):806-14.
8. Bennett S. Cardiovascular risk factors in Australia: trends in socioeconomic inequalities. *J*

1  
2  
3  
4 *Epidemiol Community Health* 1995;49(4):363-72.

5  
6  
7 9. National Statistical Office of Korea.

8  
9 [http://kosis.kr/statHtml/statHtml.do?orgId=101&tblId=DT\_2AS017&vw\_cd=MT\_RTITLE  
10 &list\_id=R\_SUB\_OTITLE\_OTIT\_WBTIT\_4004&seqNo=&lang\_mode=ko&language=kor  
11 &obj\_var\_id=&itm\_id=&conn\_path=E1](Accessed 31/07/2016)

12  
13  
14  
15  
16 10. Kang SW, Shin YS, Lee TJ, *et al.* A study on social polarization in Korea. Korea Institute  
17 for Health and Social Affairs; 2007 (Korean).

18  
19  
20  
21 11. Kweon S, Kim Y, Jang MJ, *et al.* Data resource profile: the Korea National Health and  
22 Nutrition Examination Survey (KNHANES). *Int J Epidemiol* 2014;43(1):69-77.

23  
24  
25  
26 12. Kim HJ, Kim Y, Cho Y, *et al.* Trends in the prevalence of major cardiovascular disease  
27 risk factors among Korean adults: results from the Korean National Health and Nutrition  
28 Examination Survey, 1998-2012. *Int J Cardiol* 2014;174(1):64-72.

29  
30  
31  
32  
33 13. Grundy SM, Pasternak R, Greenland P, *et al.* Assessment of cardiovascular risk by use of  
34 multiple-risk-factor assessment equations: a statement for healthcare professionals from the  
35 American Heart Association and the American College of Cardiology. *Circulation*  
36 1999;100(13):1481-92.

37  
38  
39  
40  
41  
42  
43 14. Steering Committee of the Western Pacific Region of the World Health Organization.  
44 The International Association for the Study of Obesity and the International Obesity Task  
45 Force. The Asia-Pacific perspective: redefining obesity and its treatment. Melbourne: Health  
46 Communications Australia Pty Ltd.; 2000:8-55.

47  
48  
49  
50 15. World Health Organization. Definition, diagnosis and classification of diabetes mellitus  
51 and its complication. Geneva: World Health Organization; 2001.

16. U.S. Department of Health and Human Services. The seventh report of the joint National Committee on Prevention, Detection, Evaluation, and Treatment of High Blood Pressure (JNC-7). Bethesda, MD: National Institutes of Health; 2004.
17. National Institutes of Health. Third report of the National Cholesterol Education Program (NCEP) Expert Panel on Detection, Evaluation, and Treatment of High Blood Cholesterol in Adults (Adult Treatment Panel III). Bethesda, MD: National Institutes of Health; 2002.
18. Fateh M, Emamian MH, Asgari F, *et al.* Socioeconomic inequality in hypertension in Iran. *J Hypertens* 2014;32(9):1782-8.
19. Kim YJ, Jeon JY, Han SJ, *et al.* Effect of socio-economic status on the prevalence of diabetes. *Yonsei Med J* 2015;56(3):641-7.
20. Yang G, Fan L, Tan J, *et al.* Smoking in China: findings of the 1996 national prevalence survey. *JAMA* 1999;282(13):1247-53.
21. Wen CP, Levy DT, Cheng TY, *et al.* Smoking behaviour in Taiwan, 2001. *Tob Control* 2005;14 Suppl 1:i51-5.
22. Khang YH, Cho HJ. Socioeconomic inequality in cigarette smoking: trends by gender, age, and socioeconomic position in South Korea, 1989-2003. *Prev Med* 2006;42(6):415-22.
23. Cho HJ, Song YM, Smith GD, *et al.* Trends in socio-economic differentials in cigarette smoking behaviour between 1990 and 1998: a large prospective study in Korean men. *Public Health* 2004;118(18):553-8.
24. Kim YI, Kang KH, Lee KS, *et al.* Increase in cigarette taxation and use of national health promotion fund. Ministry of Health and Welfare, Kwachon; 2003 (Korean)
25. Yoon YS, Oh SW, Park HS. Socioeconomic status in relation to obesity and abdominal

- 1  
2  
3  
4 obesity in Korean adults: A focus on sex differences. *Obesity* 2006;14(5):909-19.  
5  
6  
7 26. Wardle J, Griffith J. Socioeconomic status and weight control practices in British adults. *J*  
8  
9 *Epidemiol Community Health* 2001;55(3):185-90.  
10  
11  
12 27. Zhang Q, Wang Y. Socioeconomic inequality of obesity in the United States: do gender,  
13  
14 age, and ethnicity matter? *Soc Sci Med* 2004;58(6):1171-80.  
15  
16  
17 28. Tang M, Chen Y, Krewski D. Gender-related differences in the association between  
18  
19 socioeconomic status and self-reported diabetes. *Int J Epidemiol* 2003;32(3):381-5.  
20  
21  
22 29. Lee DS, Kim YJ, Han HR. Sex differences in the association between socio-economic  
23  
24 status and type 2 diabetes: data from the 2005 Korean National Health and Nutritional  
25  
26 Examination Survey (KNHANES). *Public Health* 2013;127(6):554-60.  
27  
28  
29 30. Kautzky-Willer A, Dorner T, Jensby A, *et al.* Women show a closer association between  
30  
31 educational level and hypertension or diabetes mellitus than males: a secondary analysis from  
32  
33 the Austrian HIS. *BMC Public Health* 2012;12:392.  
34  
35  
36 31. Espelt. A, Kunst AE, Palencia L, *et al.* Twenty years of socio-economic inequalities in  
37  
38 type 2 diabetes mellitus prevalence in Spain, 1987-2006. *Eur J Public Health*  
39  
40 2012;22(6):765-71.  
41  
42  
43 32. Imkampe AK, Gulliford MC. Increasing socio-economic inequality in type 2 diabetes  
44  
45 prevalence-repeated cross-sectional surveys in England 1994-2006. *Eur J Public Health*  
46  
47 2010;21(4):484-90.  
48  
49  
50 33. Barbeau EM, Krieger N, Soobader MJ. Working class matters: socioeconomic  
51  
52 disadvantage, race/ethnicity, gender, and smoking in NHIS 2000. *Am J Public Health*.  
53  
54 2004;94(2):269-78.  
55  
56  
57  
58  
59  
60



- 1  
2  
3  
4 34. Park SH, Kim CH, Kim DJ, *et al.* Secular trends in prevalence of alcohol use disorder and  
5  
6 its correlates in Korean adults: results from Korean National Health and Nutrition  
7  
8 Examination Survey 2005 and 2009. *Subst Abus* 2012;33(4):327-35.  
9  
10  
11 35. Korea Centers for Disease Control and Prevention, Korea Health Statistics 2012, Korea  
12  
13 National Health and Nutrition Examination Survey (KNHANESV-3), Seoul, Korea; Korea  
14  
15 Ministry of Health and Welfare; 2013.  
16  
17  
18 36. Hong SA, Kim K, Kim MK. Educational attainment and differences in fruit and vegetable  
19  
20 consumption among middle-aged adults in the Korean National Health and Nutrition  
21  
22 Examination Survey IV. *Nutr Res Pract* 2012;6(3):263-9.  
23  
24  
25  
26 37. Baek TH, Lee HY, Lim NK, *et al.* Gender differences in the association between  
27  
28 socioeconomic status and hypertension incidence: the Korean Genome and Epidemiology  
29  
30 Study (KoGES). *BMC Public Health* 2015;15:852.  
31  
32  
33 38. Kim MH, Kim MK, Choi BY, *et al.* Educational disparities in the metabolic syndrome in  
34  
35 a rapidly changing society-the case of South Korea. *Int J Epidemiol* 2005;34(6):1266-73.  
36  
37  
38 39. King NB, Harper S, Young ME. Use of relative and absolute effect measures in reporting  
39  
40 health inequalities: structured review. *BMJ* 2012;345:e5774.  
41  
42  
43 40. Kim Y. The Korea National Health and Nutrition Examination Survey (KNHANES):  
44  
45 current status and challenges. *Epidemiol Health* 2014;36:e2014002.  
46  
47  
48  
49  
50  
51  
52  
53  
54  
55  
56  
57  
58  
59  
60

## Figure legends

Fig 1. Study enrollment. The enrolled study population was from the Korean National Health and Nutrition Examination Surveys (KNHANES) 2001-2014

\*Smoking: data from the health interviews were analysed; total number of participants is 45,522.

†Diabetes and hypercholesterolemia: data from the of KNHANES III (2005) to VI (2014) were analysed; total number of participants is 37,519.

1  
2  
3  
4  
5  
6  
7  
8  
9  
10  
11  
12  
13  
14  
15  
16  
17  
18  
19  
20  
21  
22  
23  
24  
25  
26  
27  
28  
29  
30  
31  
32  
33  
34  
35  
36  
37  
38  
39  
40  
41  
42  
43  
44  
45  
46  
47  
48  
49  
50  
51  
52  
53  
54  
55  
56  
57  
58  
59  
60

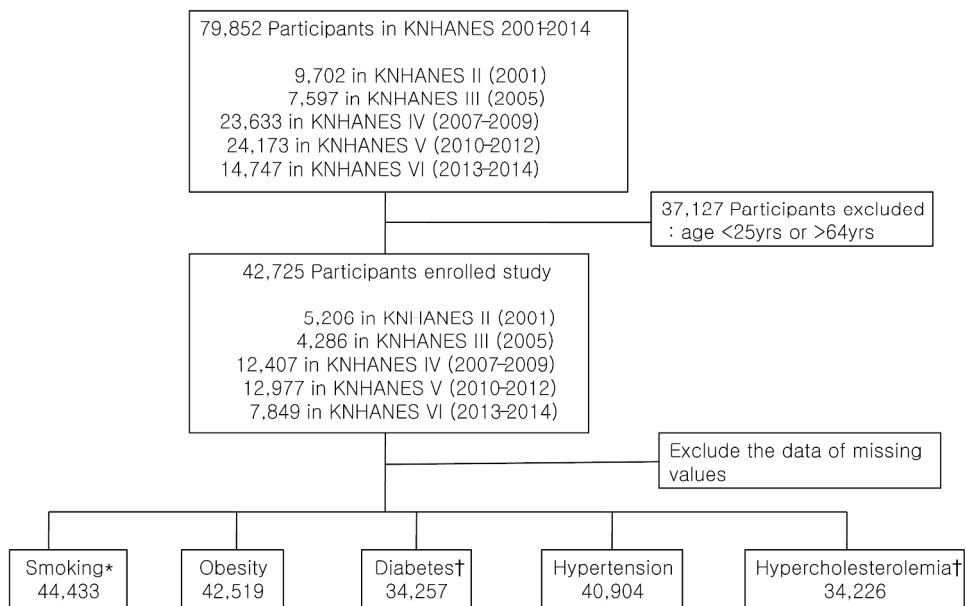

Figure 1

254x190mm (300 x 300 DPI)

ew only

Supplementary table 1. Age-adjusted prevalence (95% CI) and slope index of inequalities (SII) of smoking by SES from 2001 to 2014

|               | KNHAENS II (2001)      | KNHANES III (2005) | KNHANES IV (2007-2009) | KNHANES V (2010-2012) | KNHANES VI (2013-2014) |                 |
|---------------|------------------------|--------------------|------------------------|-----------------------|------------------------|-----------------|
| <b>Men</b>    |                        |                    |                        |                       |                        |                 |
| Education(yr) | ≥13                    | 56.6(56.6-56.7)    | 46.6(46.5-46.7)        | 42.0(41.9-42.1)       | 42.6(42.6-42.7)        | 41.9(41.9-42.0) |
|               | 10-12                  | 68.6(68.5-68.7)    | 59.2(59.2-59.3)        | 51.7(51.7-51.8)       | 53.6(53.5-53.6)        | 52.6(52.5-52.6) |
|               | 7-9                    | 67.4(67.3-67.6)    | 58.2(58.0-58.5)        | 63.6(63.4-63.8)       | 63.0(62.7-63.2)        | 44.9(44.7-45.1) |
|               | ≤6                     | 62.6(62.3-62.9)    | 51.2(50.9-51.6)        | 70.0(69.6-70.4)       | 45.8(45.6-46.1)        | 64.4(63.9-64.9) |
|               | SII                    | 9.83               | 8.98                   | 36.53                 | 13.72                  | 20.49           |
|               | P for SII trend        |                    | 0.454                  |                       |                        |                 |
| Income        | Q1 (highest)           | 57.2(57.1-57.2)    | 47.1(47.0-47.1)        | 41.2(41.1-41.2)       | 45.3(45.2-45.4)        | 42.1(42.0-42.1) |
|               | Q2                     | 62.0(61.9-62.1)    | 54.0(53.9-54.0)        | 47.9(47.8-48.0)       | 47.1(47.0-47.1)        | 47.4(47.4-47.5) |
|               | Q3                     | 67.4(67.3-67.5)    | 56.3(56.2-56.3)        | 52.0(52.0-52.1)       | 50.3(50.2-50.3)        | 48.6(48.5-48.7) |
|               | Q4 (lowest)            | 70.5(70.4-70.6)    | 62.1(62.1-62.2)        | 55.5(55.4-55.6)       | 55.1(55.0-55.1)        | 50.1(50.0-50.1) |
|               | SII                    | 17.96              | 19.08                  | 18.92                 | 12.99                  | 9.98            |
|               | P for SII linear trend |                    | 0.105                  |                       |                        |                 |
| <b>Women</b>  |                        |                    |                        |                       |                        |                 |
| Education(yr) | ≥13                    | 2.9(2.9-3.0)       | 2.5(2.4-2.5)           | 2.8(2.8-2.8)          | 4.3(4.3-4.3)           | 2.6(2.6-2.6)    |
|               | 10-12                  | 2.9(2.8-2.9)       | 6.5(6.5-6.6)           | 7.5(7.5-7.5)          | 8.8(8.8-8.9)           | 8.2(8.2-8.3)    |
|               | 7-9                    | 3.4(3.4-3.5)       | 9.2(9.0-9.3)           | 13.2(13.1-13.3)       | 26.9(26.7-27.1)        | 19.4(19.2-19.5) |
|               | ≤6                     | 2.6(2.6-2.6)       | 5.3(5.3-5.4)           | 15.2(15.0-15.4)       | 13.1(12.9-13.3)        | 15.1(14.9-15.3) |
|               | SII                    | -0.01              | 5.27                   | 16.69                 | 20.27                  | 20.55           |
|               | P for SII trend        |                    | 0.009                  |                       |                        |                 |
| Income        | Q1 (highest)           | 3.5(3.5-3.5)       | 3.5(3.5-3.5)           | 4.2(4.2-4.3)          | 4.7(4.7-4.7)           | 2.8(2.8-2.8)    |
|               | Q2                     | 2.4(2.3-2.4)       | 3.9(3.9-4.0)           | 4.1(4.1-4.1)          | 4.6(4.5-4.6)           | 4.4(4.4-4.4)    |
|               | Q3                     | 2.8(2.8-2.8)       | 5.2(5.2-5.2)           | 6.1(6.0-6.1)          | 6.8(6.8-6.8)           | 6.1(6.1-6.2)    |
|               | Q4 (lowest)            | 6.6(6.6-6.7)       | 9.0(9.0-9.1)           | 9.0(9.0-9.0)          | 10.9(10.8-10.9)        | 10.1(10.0-10.1) |
|               | SII                    | 3.82               | 7.22                   | 6.48                  | 8.39                   | 9.38            |
|               | P for SII linear trend |                    | 0.047                  |                       |                        |                 |

Narrow CI's are due to small SE for prevalence by using weighted samples, which are as large as whole population, for direct standardization

Supplementary table 2. Age-adjusted prevalence (95% CI) and slope index of inequalities (SII) of obesity by SES from 2001 to 2014

|               | KNHAES II<br>(2001)    | KNHANES III<br>(2005) | KNHANES IV<br>(2007-2009) | KNHANES V<br>(2010-2012) | KNHANES VI<br>(2013-2014) |                 |
|---------------|------------------------|-----------------------|---------------------------|--------------------------|---------------------------|-----------------|
| <b>Men</b>    |                        |                       |                           |                          |                           |                 |
| Education(yr) | ≥13                    | 36.4(36.3-36.5)       | 40.0(39.9-40.1)           | 41.8(41.7-41.8)          | 40.8(40.8-40.9)           | 41.4(41.3-41.4) |
|               | 10-12                  | 33.1(33.0-33.1)       | 37.9(37.9-38.0)           | 39.9(39.8-39.9)          | 38.8(38.8-38.9)           | 42.1(42.0-42.1) |
|               | 7-9                    | 33.2(33.1-33.3)       | 45.1(44.9-45.3)           | 41.3(41.1-41.5)          | 40.3(40.2-40.5)           | 32.9(32.8-33.1) |
|               | ≤6                     | 28.6(28.4-28.7)       | 17.2(17.1-17.2)           | 41.2(41.1-41.5)          | 29.0(28.7-29.2)           | 47.6(47.2-48.0) |
|               | SII                    | -8.22                 | -16.56                    | -0.50                    | -10.54                    | 0.08            |
|               | P for SII trend        |                       | 0.542                     |                          |                           |                 |
| Income        | Q1 (highest)           | 33.9(33.8-34.0)       | 42.3(42.8-42.9)           | 40.0(40.0-40.1)          | 41.7(41.6-41.8)           | 42.2(42.2-42.3) |
|               | Q2                     | 35.4(35.4-35.5)       | 40.0(40.0-40.1)           | 40.5(40.4-40.6)          | 38.9(38.8-39.0)           | 39.4(39.3-39.5) |
|               | Q3                     | 32.0(31.9-32.1)       | 34.2(34.1-34.2)           | 40.2(40.2-40.3)          | 40.9(40.8-40.9)           | 45.6(45.5-45.6) |
|               | Q4 (lowest)            | 34.3(34.3-34.4)       | 35.4(35.4-35.5)           | 39.0(38.9-39.1)          | 34.5(34.4-34.5)           | 38.5(38.4-38.5) |
|               | SII                    | -0.88                 | -11.40                    | -1.36                    | -7.97                     | -2.05           |
|               | P for SII linear trend |                       | 0.940                     |                          |                           |                 |
| <b>Women</b>  |                        |                       |                           |                          |                           |                 |
| Education(yr) | ≥13                    | 18.0(17.9-18.1)       | 19.1(18.9-19.2)           | 16.7(16.6-16.8)          | 18.9(18.9-19.0)           | 16.1(16.0-16.1) |
|               | 10-12                  | 30.0(29.9-30.1)       | 28.8(28.7-28.9)           | 24.8(24.7-24.8)          | 29.9(29.9-30.0)           | 24.3(24.3-24.4) |
|               | 7-9                    | 49.8(49.7-50.0)       | 35.2(35.1-35.3)           | 31.4(31.3-31.5)          | 37.0(36.8-37.1)           | 32.2(32.1-32.4) |
|               | ≤6                     | 38.0(37.8-38.2)       | 34.5(34.4-34.6)           | 42.9(42.7-43.2)          | 35.1(34.9-35.3)           | 50.8(50.5-51.2) |
|               | SII                    | 32.50                 | 21.32                     | 31.76                    | 23.51                     | 40.66           |
|               | P for SII trend        |                       | 0.487                     |                          |                           |                 |
| Income        | Q1 (highest)           | 27.2(27.1-27.3)       | 23.8(23.7-23.8)           | 22.5(22.5-22.6)          | 21.6(21.6-21.7)           | 16.2(16.1-16.2) |
|               | Q2                     | 30.0(29.9-30.1)       | 31.5(31.5-31.6)           | 23.5(23.5-23.6)          | 26.6(26.5-26.6)           | 24.0(24.0-24.1) |
|               | Q3                     | 31.3(31.2-31.4)       | 30.9(30.8-31.0)           | 29.8(29.7-29.9)          | 29.2(29.1-29.3)           | 27.6(27.6-27.7) |
|               | Q4 (lowest)            | 35.0(34.9-35.0)       | 33.1(33.0-33.1)           | 31.7(31.6-31.7)          | 33.7(33.7-33.8)           | 29.9(29.8-29.9) |
|               | SII                    | 9.76                  | 10.78                     | 13.43                    | 15.53                     | 17.86           |
|               | P for SII linear trend |                       | 0.023                     |                          |                           |                 |

Narrow CI's are due to small SE for prevalence by using weighted samples, which are as large as whole population, for direct standardization

Supplementary table 3. Age-adjusted prevalence (95% CI) and slope index of inequalities (SII) of diabetes by SES from 2005 to 2014

|               |                        | KNHANES III<br>(2005) | KNHANES IV<br>(2007-2009) | KNHANES V<br>(2010-2012) | KNHANES VI<br>(2013-2014) |
|---------------|------------------------|-----------------------|---------------------------|--------------------------|---------------------------|
| <b>Men</b>    |                        |                       |                           |                          |                           |
| Education(yr) | ≥13                    | 8.1(8.1-8.1)          | 8.3(8.2-8.3)              | 7.3(7.3-7.3)             | 8.9(8.9-8.9)              |
|               | 10-12                  | 9.4(9.4-9.5)          | 8.9(8.9-8.9)              | 9.5(9.5-9.5)             | 10.3(10.3-10.4)           |
|               | 7-9                    | 11.3(11.2-11.4)       | 10.1(10.0-10.2)           | 9.1(9.0-9.1)             | 14.2(14.1-14.3)           |
|               | ≤6                     | 10.2(10.2-10.3)       | 7.6(7.6-7.7)              | 11.1(10.9-11.2)          | 9.4(9.4-9.5)              |
|               | SII                    | 3.56                  | 0.41                      | 4.13                     | 3.66                      |
|               | P for SII trend        |                       | 0.602                     |                          |                           |
| Income        | Q1 (highest)           | 10.4(10.3-10.4)       | 7.9(7.9-8.0)              | 9.3 (9.2-9.3)            | 9.5(9.5-9.6)              |
|               | Q2                     | 6.6(6.6-6.6)          | 8.6(8.6-8.6)              | 7.3(7.3-7.3)             | 8.1(8.1-8.2)              |
|               | Q3                     | 9.0(9.0-9.0)          | 7.8(7.8-7.9)              | 8.6(8.6-8.7)             | 9.8(9.8-9.8)              |
|               | Q4 (lowest)            | 10.4(10.3-10.4)       | 11.4(11.3-11.4)           | 9.8(9.7-9.8)             | 12.1(12.1-12.2)           |
|               | SII                    | 1.05                  | 3.75                      | 1.16                     | 3.83                      |
|               | P for SII linear trend |                       | 0.576                     |                          |                           |
| <b>Women</b>  |                        |                       |                           |                          |                           |
| Education(yr) | ≥13                    | 0.6(0.6-0.6)          | 2.8(2.8-2.8)              | 3.8(3.8-3.8)             | 3.9(3.8-3.9)              |
|               | 10-12                  | 5.8(5.7-5.8)          | 5.2(5.1-5.2)              | 5.5(5.5-5.5)             | 5.6(5.6-5.7)              |
|               | 7-9                    | 7.7(7.6-7.7)          | 5.3(5.3-5.4)              | 5.0(5.0-5.1)             | 7.5(7.4-7.5)              |
|               | ≤6                     | 7.2(7.1-7.2)          | 9.2(9.1-9.2)              | 8.1(8.1-8.2)             | 7.3(7.3-7.4)              |
|               | SII                    | 8.92                  | 7.00                      | 4.55                     | 5.06                      |
|               | P for SII trend        |                       | 0.048                     |                          |                           |
| Income        | Q1 (highest)           | 6.1(6.1-6.1)          | 3.9(3.9-4.0)              | 2.9(2.8-2.9)             | 4.3(4.3-4.3)              |
|               | Q2                     | 5.1(5.1-5.1)          | 4.2(4.1-4.2)              | 4.9(4.9-5.0)             | 4.6(4.6-4.6)              |
|               | Q3                     | 6.4(6.4-6.4)          | 6.7(6.7-6.7)              | 6.4(6.3-6.4)             | 5.1(5.0-5.1)              |
|               | Q4 (lowest)            | 4.4(4.1-4.4)          | 7.5(7.5-7.5)              | 6.9(6.8-6.9)             | 7.9(7.9-7.9)              |
|               | SII                    | -1.51                 | 5.26                      | 5.31                     | 4.45                      |
|               | P for SII linear trend |                       | 0.016                     |                          |                           |

Narrow CI's are due to small SE for prevalence by using weighted samples, which are as large as whole population, for direct standardization

Supplementary table 4. Age-adjusted prevalence (95% CI) and slope index of inequalities (SII) of hypertension by SES from 2001 to 2014

|                        | KNHANES II<br>(2001) | KNHANES III<br>(2005) | KNHANES IV<br>(2007-2009) | KNHANES V<br>(2010-2012) | KNHANES VI<br>(2013-2014) |                 |
|------------------------|----------------------|-----------------------|---------------------------|--------------------------|---------------------------|-----------------|
| <b>Men</b>             |                      |                       |                           |                          |                           |                 |
| Education(yr)          | ≥13                  | 24.9(24.8-24.9)       | 24.7(24.7-24.8)           | 22.6(22.6-22.7)          | 24.7(24.6-24.7)           | 25.3(25.2-25.3) |
|                        | 10-12                | 30.6(30.5-30.7)       | 25.9(25.8-25.9)           | 23.5(23.5-23.6)          | 27.1(27.1-27.2)           | 25.2(25.2-25.3) |
|                        | 7-9                  | 28.3(28.2-28.4)       | 27.1(27.0-27.1)           | 21.9(21.9-22.0)          | 24.9(24.8-25.0)           | 23.7(23.5-23.8) |
|                        | ≤6                   | 28.2(28.0-28.3)       | 25.0(25.0-25.1)           | 24.7(24.6-24.9)          | 29.1(28.9-29.3)           | 28.5(28.2-28.7) |
|                        | SII                  | 3.96                  | 1.52                      | 1.37                     | 3.75                      | 1.79            |
| P for SII trend        |                      |                       | 0.888                     |                          |                           |                 |
| Income                 | Q1 (highest)         | 24.3(24.2-24.3)       | 26.3(26.3-26.4)           | 21.7(21.6-21.7)          | 24.4(24.4-24.5)           | 23.6(23.5-23.6) |
|                        | Q2                   | 27.8(27.8-27.9)       | 24.9(24.8-24.9)           | 23.1(23.0-23.1)          | 27.0(27.0-27.1)           | 28.4(28.4-28.5) |
|                        | Q3                   | 26.6(26.5-26.6)       | 26.0(25.9-26.1)           | 23.5(23.4-23.5)          | 26.5(26.4-26.5)           | 25.3(25.3-25.4) |
|                        | Q4 (lowest)          | 32.1(32.1-32.2)       | 30.6(30.6-30.7)           | 25.4(25.3-25.4)          | 26.4(26.3-26.4)           | 24.8(24.7-24.8) |
|                        | SII                  | 8.71                  | 5.86                      | 4.65                     | 2.10                      | 0.15            |
| P for SII linear trend |                      |                       | 0.038                     |                          |                           |                 |
| <b>Women</b>           |                      |                       |                           |                          |                           |                 |
| Education(yr)          | ≥13                  | 11.8(11.8-11.9)       | 9.1(8.9-9.2)              | 9.2(9.2-9.3)             | 10.7(10.7-10.8)           | 9.7(9.6-9.71)   |
|                        | 10-12                | 16.7(16.7-16.8)       | 15.1(15.1-15.2)           | 15.9(15.9-16.0)          | 15.1(15.0-15.1)           | 13.0(13.0-13.0) |
|                        | 7-9                  | 22.4(22.3-22.4)       | 19.3(19.2-19.3)           | 17.7(17.6-17.7)          | 20.5(20.4-20.6)           | 19.4(19.3-19.5) |
|                        | ≤6                   | 18.8(18.7-18.8)       | 22.4(22.3-22.5)           | 19.6(19.4-19.7)          | 20.9(20.7-21.0)           | 24.3(24.1-24.4) |
|                        | SII                  | 10.78                 | 17.02                     | 13.10                    | 14.39                     | 18.80           |
| P for SII trend        |                      |                       | 0.060                     |                          |                           |                 |
| Income                 | Q1 (highest)         | 15.4(15.3-15.4)       | 14.5(14.5-14.5)           | 13.9(13.8-13.9)          | 14.1(14.1-14.2)           | 9.9(9.8-9.9)    |
|                        | Q2                   | 20.0(20.0-20.1)       | 17.7(17.6-17.7)           | 13.7(13.7-13.8)          | 14.5(14.5-14.6)           | 13.3(13.2-13.3) |
|                        | Q3                   | 17.6(17.5-17.6)       | 17.4(17.4-17.5)           | 16.3(16.3-16.4)          | 17.1(17.0-17.1)           | 18.4(18.4-18.5) |
|                        | Q4 (lowest)          | 18.0(17.9-18.1)       | 18.5(18.4-18.5)           | 17.6(17.5-17.6)          | 18.2(18.1-18.2)           | 15.4(15.3-15.4) |
|                        | SII                  | 2.21                  | 4.62                      | 5.48                     | 5.82                      | 8.71            |
| P for SII linear trend |                      |                       | 0.057                     |                          |                           |                 |

Narrow CI's are due to small SE for prevalence by using weighted samples, which are as large as whole population, for direct standardization

Supplementary table 5. Age-adjusted prevalence (95% CI) and slope index of inequalities (SII) of hypercholesterolemia by SES from 2005 to 2014

|               | KNHANES III<br>(2005) | KNHANES IV<br>(2007-2009) | KNHANES V<br>(2010-2012) | KNHANES VI<br>(2013-2014) |                 |
|---------------|-----------------------|---------------------------|--------------------------|---------------------------|-----------------|
| <b>Men</b>    |                       |                           |                          |                           |                 |
| Education(yr) | ≥13                   | 7.1(7.1-7.1)              | 9.7(9.6-9.7)             | 11.2(11.2-11.3)           | 12.0(12.0-12.2) |
|               | 10-12                 | 8.2(8.2-8.2)              | 9.5(9.5-9.6)             | 12.4(12.4-12.4)           | 13.3(13.2-13.3) |
|               | 7-9                   | 4.3(4.2-4.3)              | 10.3(10.2-10.3)          | 9.8(9.8-9.9)              | 16.9(16.8-17.1) |
|               | ≤6                    | 7.6(7.6-7.7)              | 8.9(8.8-9.0)             | 8.9(8.9-9.0)              | 12.2(12.0-12.4) |
|               | SII                   | -1.40                     | -0.28                    | -3.02                     | 2.80            |
|               |                       |                           | 0.378                    |                           |                 |
| Income        | Q1 (highest)          | 8.0(8.0-8.1)              | 9.9(9.9-9.9)             | 13.1(13.0-13.1)           | 13.6(13.6-13.7) |
|               | Q2                    | 4.8(4.8-4.9)              | 8.7(8.6-8.7)             | 8.9(8.9-8.9)              | 14.7(14.6-14.7) |
|               | Q3                    | 7.6(7.6-7.7)              | 8.8(8.7-8.8)             | 12.9(12.9-12.9)           | 10.9(10.9-11.0) |
|               | Q4 (lowest)           | 8.9(8.9-9.0)              | 10.2(10.1-10.2)          | 12.4(12.4-12.5)           | 11.5(11.4-11.5) |
|               | SII                   | 2.27                      | 0.34                     | 0.86                      | -4.08           |
|               |                       |                           | 0.085                    |                           |                 |
| <b>Women</b>  |                       |                           |                          |                           |                 |
| Education(yr) | ≥13                   | 13.5(13.3-13.6)           | 13.1(13.0-13.2)          | 12.2(12.2-12.3)           | 12.4(12.3-12.4) |
|               | 10-12                 | 8.4(8.3-8.4)              | 9.7(9.7-9.8)             | 13.7(13.7-13.8)           | 11.0(11.0-11.0) |
|               | 7-9                   | 7.1(7.0-7.1)              | 10.3(10.3-10.4)          | 11.2(11.1-11.2)           | 9.8(9.7-9.8)    |
|               | ≤6                    | 5.2(5.1-5.2)              | 11.9(11.8-11.9)          | 9.8(9.8-9.9)              | 10.4(10.3-10.4) |
|               | SII                   | -10.25                    | -1.89                    | -3.27                     | -3.20           |
|               |                       |                           | 0.177                    |                           |                 |
| Income        | Q1 (highest)          | 8.0(7.9-8.0)              | 10.2(10.2-10.3)          | 12.4(12.4-12.5)           | 11.8(11.8-11.9) |
|               | Q2                    | 7.4(7.4-7.4)              | 9.2(9.2-9.3)             | 12.2(12.1-12.2)           | 9.8(9.8-9.8)    |
|               | Q3                    | 5.6(5.5-5.6)              | 10.0(10.0-10.0)          | 11.7(11.7-11.8)           | 14.2(14.2-14.3) |
|               | Q4 (lowest)           | 7.6(7.6-7.7)              | 10.9(10.9-10.9)          | 13.8(13.8-13.8)           | 11.7(11.6-11.7) |
|               | SII                   | -1.08                     | 1.08                     | 1.49                      | 1.58            |
|               |                       |                           | 0.535                    |                           |                 |

Narrow CI's are due to small SE for prevalence by using weighted samples, which are as large as whole population, for direct standardization



Supplementary table 6. Comparing difference of SES distribution between responder and non-responder (smoking)

|               |              | Response<br>(n=44433, 98%) |         | Non-response<br>(n=1089, 2%) |         |
|---------------|--------------|----------------------------|---------|------------------------------|---------|
| Education(yr) | ≥13          | 15438                      | (36%)   | 36                           | (27.3%) |
|               | 10-12        | 16815                      | (38.1%) | 49                           | (37.1%) |
|               | 7-9          | 5272                       | (12.0%) | 19                           | (14.4%) |
|               | ≤6           | 6583                       | (14.9%) | 28                           | (21.2%) |
| p-value*      |              |                            |         | 0.093                        |         |
| Income        | Q1 (highest) | 11112                      | (25.5%) | 198                          | (19.5%) |
|               | Q2           | 11032                      | (25.3%) | 235                          | (23.1%) |
|               | Q3           | 10915                      | (25.0%) | 243                          | (23.9%) |
|               | Q4 (lowest)  | 10576                      | (24.2%) | 340                          | (33.5%) |
| p-value*      |              |                            |         | <0.0001                      |         |

\*p-value for chi-square test

(We analyzed the data of health interview for smoking behaviour, total number is 45,522)

Supplementary table 7. Comparing difference of SES distribution between responder and non-responder (obesity)

|               |              | Response<br>(n=42519, 99%) |         | Non-response<br>(n=206, 1%) |         |
|---------------|--------------|----------------------------|---------|-----------------------------|---------|
| Education(yr) | ≥13          | 14399                      | (34.9%) | 47                          | (31.1%) |
|               | 10-12        | 15621                      | (37.8%) | 63                          | (41.7%) |
|               | 7-9          | 4972                       | (12.0%) | 26                          | (17.2%) |
|               | ≤6           | 6284                       | (15.2%) | 15                          | (9.9%)  |
| p-value*      |              |                            |         | 0.063                       |         |
| Income        | Q1 (highest) | 10535                      | (25.3%) | 31                          | (16.2%) |
|               | Q2           | 10516                      | (25.2%) | 44                          | (23.0%) |
|               | Q3           | 10453                      | (25.1%) | 51                          | (26.7%) |
|               | Q4 (lowest)  | 10218                      | (24.5%) | 65                          | (34.0%) |
| p-value*      |              |                            |         | 0.003                       |         |

\* p-value for chi-square test

Supplementary table 8. Comparing difference of SES distribution between responder and non-responder (diabetes)

|               |              | Response<br>(n=34257, 92%) |         | Non-response<br>(n=3262, 8%) |         |
|---------------|--------------|----------------------------|---------|------------------------------|---------|
| Education(yr) | ≥ 13         | 12308                      | (36.0%) | 670                          | (32.8%) |
|               | 10-12        | 12810                      | (37.5%) | 752                          | (36.8%) |
|               | 7-9          | 3975                       | (11.6%) | 258                          | (12.6%) |
|               | ≤ 6          | 5095                       | (14.9%) | 363                          | (17.8%) |
| p-value*      |              |                            |         | 0.001                        |         |
| Income        | Q1 (highest) | 8652                       | (25.5%) | 655                          | (21.0%) |
|               | Q2           | 8561                       | (25.3%) | 700                          | (22.4%) |
|               | Q3           | 8517                       | (25.1%) | 782                          | (25.0%) |
|               | Q4 (lowest)  | 8148                       | (24.1%) | 988                          | (31.6%) |
| p-value*      |              |                            |         | <0.001                       |         |

\*p-value for chi-square test

(We analyzed only the data of KNHANES III (2005) to VI (2014) for diabetes, total number is 37,519)

Supplementary table 9. Comparing difference of SES distribution between responder and non-responder (hypertension)

|               |              | Response<br>(n=40904, 96%) |         | Non-response<br>(n=1821, 4%) |         |
|---------------|--------------|----------------------------|---------|------------------------------|---------|
| Education(yr) | ≥ 13         | 14265                      | (35.0%) | 181                          | (29.4%) |
|               | 10-12        | 15430                      | (37.8%) | 254                          | (41.3%) |
|               | 7-9          | 4908                       | (12.0%) | 90                           | (14.6%) |
|               | ≤ 6          | 6209                       | (15.2%) | 90                           | (14.6%) |
| p-value*      |              |                            |         | 0.013                        |         |
| Income        | Q1 (highest) | 10176                      | (25.3%) | 390                          | (23.0%) |
|               | Q2           | 10149                      | (25.2%) | 411                          | (24.2%) |
|               | Q3           | 10102                      | (25.1%) | 402                          | (23.7%) |
|               | Q4 (lowest)  | 9788                       | (24.3%) | 495                          | (29.2%) |
| p-value*      |              |                            |         | <0.001                       |         |

\*p-value for chi-square test

Supplementary table 10. Comparing difference of SES distribution between responder and non-responder (hypercholesterolemia)

|               |              | Response<br>(n=34226, 91%) |         | Non-response<br>(n=3293, 9%) |         |
|---------------|--------------|----------------------------|---------|------------------------------|---------|
| Education(yr) | ≥13          | 12298                      | (36.0%) | 680                          | (32.8%) |
|               | 10-12        | 12794                      | (37.5%) | 768                          | (37.0%) |
|               | 7-9          | 3972                       | (11.6%) | 261                          | (12.6%) |
|               | ≤6           | 5093                       | (14.9%) | 365                          | (17.6%) |
| p-value*      |              | <0.001                     |         |                              |         |
| Income        | Q1 (highest) | 8645                       | (25.5%) | 662                          | (21.0%) |
|               | Q2           | 8552                       | (25.3%) | 709                          | (22.5%) |
|               | Q3           | 8508                       | (25.1%) | 791                          | (25.1%) |
|               | Q4 (lowest)  | 8142                       | (24.1%) | 994                          | (31.5%) |
| p-value*      |              | <0.001                     |         |                              |         |

\*p-value for chi-square test

(We analyzed only the data of KNHANES III (2005) to VI (2014) for hypercholesterolemia, total number is 37,519)

STROBE 2007 (v4)Statement—Checklist of items that should be included in reports of cross-sectional studies

| Section/Topic             | Item # | Recommendation                                                                                                                                                                       | Reported on page # |
|---------------------------|--------|--------------------------------------------------------------------------------------------------------------------------------------------------------------------------------------|--------------------|
| Title and abstract        | 1      | (a) Indicate the study’s design with a commonly used term in the title or the abstract                                                                                               | 1,3                |
|                           |        | (b) Provide in the abstract an informative and balanced summary of what was done and what was found                                                                                  | 3                  |
| <b>Introduction</b>       |        |                                                                                                                                                                                      |                    |
| Background/rationale      | 2      | Explain the scientific background and rationale for the investigation being reported                                                                                                 | 5                  |
| Objectives                | 3      | State specific objectives, including any prespecified hypotheses                                                                                                                     | 5                  |
| <b>Methods</b>            |        |                                                                                                                                                                                      |                    |
| Study design              | 4      | Present key elements of study design early in the paper                                                                                                                              | 6                  |
| Setting                   | 5      | Describe the setting, locations, and relevant dates, including periods of recruitment, exposure, follow-up, and data collection                                                      | 6-8                |
| Participants              | 6      | (a) Give the eligibility criteria, and the sources and methods of selection of participants                                                                                          | 6                  |
| Variables                 | 7      | Clearly define all outcomes, exposures, predictors, potential confounders, and effect modifiers. Give diagnostic criteria, if applicable                                             | 6-8                |
| Data sources/ measurement | 8*     | For each variable of interest, give sources of data and details of methods of assessment (measurement). Describe comparability of assessment methods if there is more than one group | 6-10               |
| Bias                      | 9      | Describe any efforts to address potential sources of bias                                                                                                                            | 6-8                |
| Study size                | 10     | Explain how the study size was arrived at                                                                                                                                            | -                  |
| Quantitative variables    | 11     | Explain how quantitative variables were handled in the analyses. If applicable, describe which groupings were chosen and why                                                         | 6-10               |
| Statistical methods       | 12     | (a) Describe all statistical methods, including those used to control for confounding                                                                                                | 9-10               |
|                           |        | (b) Describe any methods used to examine subgroups and interactions                                                                                                                  | 9-10               |
|                           |        | (c) Explain how missing data were addressed                                                                                                                                          | 6                  |
|                           |        | (d) If applicable, describe analytical methods taking account of sampling strategy                                                                                                   | 10                 |
|                           |        | (e) Describe any sensitivity analyses                                                                                                                                                | 10                 |
| <b>Results</b>            |        |                                                                                                                                                                                      |                    |

|                          |     |                                                                                                                                                                                                              |            |
|--------------------------|-----|--------------------------------------------------------------------------------------------------------------------------------------------------------------------------------------------------------------|------------|
| Participants             | 13* | (a) Report numbers of individuals at each stage of study—eg numbers potentially eligible, examined for eligibility, confirmed eligible, included in the study, completing follow-up, and analysed            | 6          |
|                          |     | (b) Give reasons for non-participation at each stage                                                                                                                                                         | 6          |
|                          |     | (c) Consider use of a flow diagram                                                                                                                                                                           | 6          |
| Descriptive data         | 14* | (a) Give characteristics of study participants (eg demographic, clinical, social) and information on exposures and potential confounders                                                                     | 11-12      |
|                          |     | (b) Indicate number of participants with missing data for each variable of interest                                                                                                                          | 6          |
| Outcome data             | 15* | Report numbers of outcome events or summary measures                                                                                                                                                         | 12         |
| Main results             | 16  | (a) Give unadjusted estimates and, if applicable, confounder-adjusted estimates and their precision (eg, 95% confidence interval). Make clear which confounders were adjusted for and why they were included | 10-17      |
|                          |     | (b) Report category boundaries when continuous variables were categorized                                                                                                                                    | 11-20      |
|                          |     | (c) If relevant, consider translating estimates of relative risk into absolute risk for a meaningful time period                                                                                             | 23         |
| Other analyses           | 17  | Report other analyses done—eg analyses of subgroups and interactions, and sensitivity analyses                                                                                                               | 10, 11, 23 |
| <b>Discussion</b>        |     |                                                                                                                                                                                                              |            |
| Key results              | 18  | Summarise key results with reference to study objectives                                                                                                                                                     | 16-21      |
| Limitations              | 19  | Discuss limitations of the study, taking into account sources of potential bias or imprecision. Discuss both direction and magnitude of any potential bias                                                   | 24         |
| Interpretation           | 20  | Give a cautious overall interpretation of results considering objectives, limitations, multiplicity of analyses, results from similar studies, and other relevant evidence                                   | 23-24      |
| Generalisability         | 21  | Discuss the generalisability (external validity) of the study results                                                                                                                                        | 24         |
| <b>Other information</b> |     |                                                                                                                                                                                                              |            |
| Funding                  | 22  | Give the source of funding and the role of the funders for the present study and, if applicable, for the original study on which the present article is based                                                | 25         |

\*Give information separately for cases and controls in case-control studies and, if applicable, for exposed and unexposed groups in cohort and cross-sectional studies.

**Note:** An Explanation and Elaboration article discusses each checklist item and gives methodological background and published examples of transparent reporting. The STROBE checklist is best used in conjunction with this article (freely available on the Web sites of PLoS Medicine at <http://www.plosmedicine.org/>, Annals of Internal Medicine at <http://www.annals.org/>, and Epidemiology at <http://www.epidem.com/>). Information on the STROBE Initiative is available at [www.strobe-statement.org](http://www.strobe-statement.org).
